# Supplementary material for: Monitoring deforestation, forest health, and environmental criticality in a protected area periphery using Geospatial Techniques
Source: PeerJ. 2024 Jul 18;12:e17714. doi: 10.7717/peerj.17714 (PMC11260410; doi:10.7717/peerj.17714)
Supplement: Supplemental Information 1 [file peerj-12-17714-s001.xls]

## Sheet: LST_NDVI1988
					1988	NDVI1988	LST1988
						0.563218	24.5451
						0.581395	24.115
						0.494505	24.5451
						0.536585	24.5451
						0.560976	24.9738
						0.542169	24.9738
						0.595506	24.5451
						0.482353	25.8268
						0.555556	24.9738
						0.463415	25.401
						0.506173	24.9738
						0.478261	24.9738
						0.393939	26.2512
						0.458824	26.2512
						0.522727	25.401
						0.552941	25.401
						0.56962	24.5451
						0.552941	24.5451
						0.425532	25.8268
						0.566265	24.9738
						0.505376	25.401
						0.382979	27.5159
						0.547619	24.5451
						0.555556	24.9738
						0.257143	26.6741
						0.5	24.9738
						0.573034	24.5451
						0.590909	24.9738
						0.419355	25.401
						0.44186	25.8268
						0.1875	27.0957
						0.269231	27.9348
						0.518072	25.401
						0.261261	27.5159
						0.511628	26.2512
						0.517241	24.9738
						0.609195	24.5451
						0.555556	24.115
						0.585366	24.115
						0.450549	24.9738
						0.52381	24.9738
						0.591398	24.9738
						0.397849	26.2512
						0.591398	24.9738
						0.518987	24.9738
						0.530864	24.9738
						0.45	26.2512
						0.5	25.401
						0.5	25.401
						0.180328	27.9348
						0.535714	26.6741
						0.369369	25.8268
						0.417476	23.6834
						0.552941	24.5451
						0.47619	24.9738
						0.096774	29.1833
						0.576471	24.115
						0.6	23.6834
						0.590909	24.5451
						0.576471	24.5451
						0.277311	26.2512
						0.22	28.3523
						0.505618	25.8268
						0.529412	25.8268
						0.402299	26.6741
						0.256198	26.6741
						0.574468	24.9738
						0.54023	25.401
						0.525	25.401
						0.445783	27.0957
						0.478261	26.6741
						0.162791	27.9348
						0.552941	24.9738
						0.25	30.0091
						0.301887	29.1833
						0.1875	27.5159
						0.493976	25.401
						0.518072	24.9738
						0.536585	24.5451
						0.581395	24.115
						0.576471	24.115
						0.6	24.115
						0.609195	24.5451
						0.564103	24.5451
						0.595238	24.115
						0.576471	23.6834
						0.595506	24.115
						0.536585	25.401
						0.545455	26.2512
						0.15493	24.9738
						0.376344	26.6741
						0.52809	25.8268
						0.27619	27.0957
						0.243243	28.3523
						0.535354	26.2512
						0.443038	25.8268
						0.15942	27.0957
						0.340426	27.5159
						0.258621	28.7684
						0.486239	26.2512
						0.531532	24.9738
						0.102804	30.4201
						0.525	25.8268
						0.468354	24.9738
						0.487179	24.9738
						0.526316	24.9738
						0.555556	24.5451
						0.580247	24.115
						0.566265	24.115
						0.566265	23.6834
						0.581395	24.115
						0.571429	23.6834
						0.576471	23.6834
						0.617977	24.5451
						0.529412	24.9738
						0.566265	24.9738
						0.576471	24.115
						0.46	28.3523
						0.219512	29.1833
						0.190476	29.5969
						0.209677	27.5159
						0.462963	27.0957
						0.259259	27.9348
						0.441441	26.2512
						0.189542	28.7684
						0.490196	25.8268
						0.327103	28.3523
						0.36	27.0957
						0.5	24.9738
						0.525	24.9738
						0.555556	24.9738
						0.512821	24.9738
						0.506494	24.9738
						0.560976	24.5451
						0.538462	24.9738
						0.571429	24.5451
						0.56962	24.5451
						0.560976	23.6834
						0.576471	23.6834
						0.590361	24.115
						0.571429	24.5451
						0.595506	24.115
						0.590909	24.115
						0.460674	25.8268
						0.534884	24.9738
						0.555556	25.8268
						0.572816	25.8268
						0.55102	24.5451
						0.310345	27.0957
						0.542857	24.9738
						0.252174	29.1833
						0.291667	29.1833
						0.571429	24.9738
						0.544304	24.9738
						0.530864	24.9738
						0.555556	24.9738
						0.542169	24.9738
						0.552941	24.9738
						0.558442	24.9738
						0.55	24.9738
						0.544304	24.5451
						0.555556	24.9738
						0.56962	24.5451
						0.589744	24.5451
						0.585366	24.115
						0.585366	24.5451
						0.571429	24.5451
						0.590909	24.115
						0.6	24.5451
						0.609195	24.5451
						0.586207	24.115
						0.428571	25.8268
						0.581395	24.5451
						0.494253	26.2512
						0.213675	30.0091
						0.52381	25.401
						0.586207	25.8268
						0.550562	24.9738
						0.586957	24.9738
						0.591398	25.401
						0.581395	24.9738
						0.529412	24.9738
						0.571429	24.9738
						0.581395	24.5451
						0.55	24.115
						0.590909	24.5451
						0.566265	24.9738
						0.530864	24.5451
						0.580247	24.9738
						0.580247	24.9738
						0.585366	24.5451
						0.571429	24.115
						0.55	24.9738
						0.580247	24.5451
						0.613636	24.115
						0.586207	24.9738
						0.411765	24.9738
						0.566265	24.115
						0.542169	25.8268
						0.395833	25.8268
						0.536585	24.9738
						0.431579	25.8268
						0.252525	27.0957
						0.534884	24.9738
						0.511111	25.401
						0.581395	24.9738
						0.568182	25.401
						0.604396	24.9738
						0.505376	24.9738
						0.555556	24.9738
						0.563218	24.9738
						0.552941	24.5451
						0.560976	24.9738
						0.581395	24.9738
						0.617021	24.5451
						0.586207	24.5451
						0.581395	24.5451
						0.566265	24.115
						0.571429	24.9738
						0.581395	24.9738
						0.586207	24.5451
						0.595506	24.115
						0.581395	24.5451
						0.609195	23.6834
						0.6	24.115
						0.542169	24.5451
						0.6	24.5451
						0.586207	24.115
						0.6	23.6834
						0.6	23.6834
						0.604651	24.115
						0.278351	28.7684
						0.505882	25.401
						0.333333	27.9348
						0.568182	24.9738
						0.582418	24.9738
						0.6	24.9738
						0.590909	24.9738
						0.6	24.9738
						0.576471	24.9738
						0.552941	24.9738
						0.542169	24.5451
						0.604396	24.9738
						0.542169	24.9738
						0.590909	24.9738
						0.586207	24.5451
						0.6	24.5451
						0.612903	24.5451
						0.590909	24.5451
						0.604396	24.115
						0.590909	23.6834
						0.581395	24.115
						0.560976	23.6834
						0.595238	23.6834
						0.568182	24.5451
						0.555556	24.9738
						0.576471	24.5451
						0.581395	24.9738
						0.604396	24.5451
						0.220339	30.0091
						0.228346	27.5159
						0.52381	25.401
						0.5	25.401
						0.595506	24.9738
						0.563218	24.9738
						0.595506	24.9738
						0.568182	24.9738
						0.586207	24.5451
						0.55814	24.9738
						0.576471	24.9738
						0.586207	24.5451
						0.568182	24.5451
						0.560976	24.5451
						0.6	24.5451
						0.577778	24.5451
						0.613636	24.5451
						0.595506	24.5451
						0.566265	24.115
						0.586207	24.5451
						0.604651	24.115
						0.558442	23.6834
						0.525	23.6834
						0.585366	24.115
						0.6	23.6834
						0.604651	24.115
						0.630435	23.6834
						0.46988	25.8268
						0.55814	24.9738
						0.547619	24.9738
						0.571429	24.9738
						0.617021	24.9738
						0.563218	24.9738
						0.581395	24.9738
						0.563218	24.9738
						0.617021	24.9738
						0.626374	24.9738
						0.617977	24.9738
						0.604651	24.5451
						0.55	24.9738
						0.55814	24.9738
						0.595506	24.9738
						0.609195	24.5451
						0.571429	24.5451
						0.560976	24.5451
						0.564103	24.5451
						0.619048	23.6834
						0.590909	24.5451
						0.6	24.5451
						0.595238	24.115
						0.566265	24.115
						0.586207	23.6834
						0.581395	24.115
						0.233333	28.3523
						0.488372	25.401
						0.54023	25.401
						0.550562	25.401
						0.525	25.401
						0.552941	25.401
						0.493976	26.6741
						0.565217	25.401
						0.582418	24.9738
						0.6	24.9738
						0.604167	24.9738
						0.346939	27.0957
						0.188406	27.9348
						0.6	24.9738
						0.586207	24.5451
						0.581395	24.5451
						0.560976	24.5451
						0.589744	24.115
						0.560976	24.5451
						0.585366	24.5451
						0.576471	24.5451
						0.604651	23.6834
						0.595238	24.115
						0.617977	23.6834
						0.192982	27.0957
						0.581395	24.115
						0.590909	24.5451
						0.487805	25.8268
						0.582418	25.401
						0.582418	25.401
						0.306931	28.3523
						0.568182	25.401
						0.590909	25.401
						0.577778	24.9738
						0.613636	24.9738
						0.608696	24.5451
						0.586957	24.9738
						0.617021	24.9738
						0.595506	24.5451
						0.571429	24.5451
						0.555556	24.5451
						0.566265	23.6834
						0.585366	24.115
						0.576471	24.115
						0.604396	24.115
						0.581395	24.5451
						0.590909	24.115
						0.590361	23.6834
						0.590909	24.9738
						0.586207	24.5451
						0.595506	24.5451
						0.462366	26.2512
						0.27619	28.7684
						0.47619	25.8268
						0.573034	25.401
						0.529412	25.401
						0.6	24.9738
						0.568182	24.9738
						0.6	24.9738
						0.595506	24.9738
						0.552941	24.9738
						0.545455	24.5451
						0.595506	24.9738
						0.55814	24.5451
						0.586207	24.5451
						0.576471	24.5451
						0.576471	24.5451
						0.326733	26.2512
						0.536585	25.401
						0.576471	24.5451
						0.217391	27.5159
						0.375	26.2512
						0.380952	26.2512
						0.302326	27.0957
						0.6	24.5451
						0.22807	26.2512
						0.42268	26.6741
						0.5	25.8268
						0.5	25.8268
						0.325843	26.6741
						0.577778	24.9738
						0.590909	24.9738
						0.576471	24.9738
						0.590909	24.9738
						0.525	25.401
						0.52381	25.401
						0.581395	24.9738
						0.586207	24.9738
						0.406593	25.8268
						0.279279	27.5159
						0.534884	25.401
						0.590361	24.115
						0.581395	24.5451
						0.581395	24.5451
						0.56962	24.115
						0.576471	24.5451
						0.585366	24.115
						0.590361	23.6834
						0.6	24.5451
						0.6	24.5451
						0.040541	29.1833
						0.5	25.8268
						0.506173	25.401
						0.5	25.8268
						0.536842	25.401
						0.460674	26.2512
						0.538462	25.8268
						0.518072	25.8268
						0.55	24.9738
						0.552941	24.9738
						0.225806	27.0957
						0.566265	24.9738
						0.581395	24.9738
						0.566265	24.115
						0.566265	24.5451
						0.581395	24.5451
						0.581395	24.5451
						0.622222	24.5451
						0.595238	23.6834
						0.595506	24.115
						0.619048	24.115
						0.595238	24.115
						0.6	24.5451
						0.609195	24.5451
						0.413043	26.6741
						0.465116	26.2512
						0.534884	25.401
						0.478261	26.6741
						0.52381	25.401
						0.444444	26.6741
						0.542169	25.401
						0.529412	25.401
						0.272727	27.9348
						0.078014	30.0091
						0.581395	24.9738
						0.604651	24.5451
						0.581395	24.5451
						0.6	24.5451
						0.576471	24.5451
						0.560976	24.5451
						0.590909	24.115
						0.604651	24.115
						0.580247	24.115
						0.590361	24.5451
						0.595238	23.6834
						0.595238	24.115
						0.590361	24.5451
						0.576471	24.115
						0.454545	27.9348
						0.015075	29.5969
						0.145299	28.3523
						0.493976	25.401
						0.511628	25.8268
						0.563218	25.401
						0.586207	24.9738
						0.590909	24.5451
						0.586207	24.9738
						0.555556	25.8268
						0.355556	27.0957
						0.571429	24.5451
						0.586207	24.9738
						0.586207	24.5451
						0.576471	24.5451
						0.560976	24.115
						0.609195	24.5451
						0.6	24.115
						0.609195	24.115
						0.595238	23.6834
						0.604651	24.115
						0.6	24.5451
						0.585366	24.115
						0.391304	27.5159
						0.404255	27.9348
						0.5	26.2512
						0.41573	25.8268
						0.6	24.9738
						0.604396	24.9738
						0.590909	24.9738
						0.581395	24.9738
						0.595506	24.5451
						0.573034	24.9738
						0.512195	25.401
						0.233645	27.0957
						0.560976	24.9738
						0.571429	24.5451
						0.518072	24.9738
						0.571429	24.9738
						0.581395	24.5451
						0.590909	24.5451
						0.613636	24.5451
						0.609195	24.115
						0.268817	26.2512
						0.609756	24.5451
						0.56962	24.115
						0.563218	24.9738
						0.112676	25.8268
						0.564103	24.9738
						0.575	25.401
						0.538462	24.5451
						0.576471	24.5451
						0.536585	24.9738
						0.564103	24.9738
						0.544304	24.9738
						0.481481	25.401
						0.355556	27.0957
						0.555556	24.9738
						0.270833	28.7684
						0.439024	26.2512
						0.418605	26.6741
						0.5	25.401
						0.568182	25.401
						0.612903	24.9738
						0.576471	24.9738
						0.608696	24.5451
						0.568182	24.5451
						0.6	24.9738
						0.6	24.5451
						0.511111	25.401
						0.576471	24.9738
						0.488372	25.401
						0.566265	24.5451
						0.560976	24.5451
						0.560976	24.5451
						0.590361	24.5451
						0.619048	24.5451
						0.571429	25.401
						0.595238	24.115
						0.580247	24.115
						0.576471	24.5451
						0.576471	25.401
						0.269565	25.8268
						0.576471	24.115
						0.604651	24.5451
						0.594937	24.115
						0.576471	24.115
						0.580247	24.5451
						0.571429	24.115
						0.566265	24.5451
						0.6	24.5451
						0.571429	24.115
						0.6	24.115
						0.544304	24.9738
						0.46988	26.2512
						0.304348	27.0957
						0.604651	24.5451
						0.255814	27.9348
						0.5	25.8268
						0.493671	26.2512
						0.481481	26.2512
						0.555556	25.401
						0.576471	24.9738
						0.595506	24.5451
						0.595506	24.5451
						0.617977	24.5451
						0.613636	24.115
						0.586207	24.5451
						0.576471	24.5451
						0.563218	24.5451
						0.590909	24.5451
						0.530864	24.9738
						0.573034	25.401
						0.590909	25.401
						0.326733	25.8268
						0.448276	25.8268
						0.576471	24.5451
						0.580247	24.5451
						0.609195	24.5451
						0.590361	24.115
						0.581395	24.9738
						0.581395	23.6834
						0.580247	24.115
						0.626667	23.6834
						0.56962	23.6834
						0.594937	24.115
						0.584416	24.115
						0.604938	24.115
						0.6	23.6834
						0.560976	23.6834
						0.604651	24.115
						0.595238	23.6834
						0.555556	24.5451
						0.571429	24.115
						0.617977	24.5451
						0.595506	23.6834
						0.604651	23.6834
						0.555556	25.401
						0.192661	27.5159
						0.242718	29.1833
						0.376344	27.0957
						0.577778	24.9738
						0.604396	24.9738
						0.604396	24.5451
						0.586207	24.9738
						0.595238	24.5451
						0.590909	24.5451
						0.577778	24.5451
						0.573034	24.5451
						0.590909	24.5451
						0.613636	24.115
						0.590909	24.115
						0.6	25.401
						0.571429	26.2512
						0.489796	27.0957
						0.489796	27.0957
						0.347826	28.3523
						0.404255	26.2512
						0.5	25.8268
						0.576471	24.9738
						0.393939	25.8268
						0.162791	27.9348
						0.55	24.5451
						0.571429	24.115
						0.564103	24.115
						0.575	23.6834
						0.578947	24.5451
						0.564103	23.6834
						0.578947	23.6834
						0.580247	24.115
						0.589744	24.115
						0.6	23.6834
						0.576471	23.6834
						0.580247	24.115
						0.452381	25.401
						0.393258	25.401
						0.566265	24.5451
						0.525	24.9738
						0.512821	24.5451
						0.590909	24.115
						0.609195	24.115
						0.566265	24.5451
						0.290323	27.0957
						0.47619	26.2512
						0.5	25.8268
						0.604396	24.9738
						0.622222	24.9738
						0.576471	24.5451
						0.608696	24.5451
						0.590909	24.5451
						0.581395	24.5451
						0.590909	24.5451
						0.613636	24.115
						0.581395	24.5451
						0.608247	25.401
						0.465116	26.6741
						0.339623	27.5159
						0.5	26.2512
						0.573034	25.8268
						0.48	25.401
						0.585366	24.5451
						0.564103	24.5451
						0.595238	24.5451
						0.555556	24.5451
						0.580247	24.115
						0.564103	23.6834
						0.566265	24.115
						0.589744	24.5451
						0.575	24.115
						0.558442	23.6834
						0.56962	23.6834
						0.584416	23.6834
						0.595238	24.115
						0.580247	24.115
						0.6	23.6834
						0.6	24.115
						0.580247	23.6834
						0.590361	24.115
						0.580247	23.6834
						0.55	24.115
						0.580247	24.115
						0.585366	23.6834
						0.581395	24.115
						0.6	24.115
						0.466667	27.5159
						0.55	25.401
						0.581395	24.9738
						0.604396	24.9738
						0.608696	24.5451
						0.571429	24.9738
						0.586207	24.115
						0.590909	24.5451
						0.609195	24.5451
						0.45098	25.8268
						0.504951	26.2512
						0.515152	27.0957
						0.56	25.8268
						0.5	26.6741
						0.547619	24.5451
						0.560976	24.5451
						0.590361	24.9738
						0.590361	24.115
						0.590361	24.115
						0.575	24.5451
						0.566265	24.5451
						0.55	24.5451
						0.56962	24.115
						0.56962	24.115
						0.56962	24.115
						0.564103	23.6834
						0.558442	23.6834
						0.580247	24.115
						0.589744	23.6834
						0.6	24.115
						0.586207	23.6834
						0.525	24.5451
						0.575	24.115
						0.566265	24.115
						0.595238	23.6834
						0.590361	24.115
						0.581395	24.115
						0.536585	25.401
						0.544304	24.115
						0.55	24.9738
						0.290909	27.0957
						0.465347	28.3523
						0.47619	26.6741
						0.47619	24.9738
						0.586207	24.9738
						0.6	24.5451
						0.595506	24.9738
						0.595506	24.5451
						0.626374	24.5451
						0.608247	24.9738
						0.514563	27.0957
						0.510204	26.2512
						0.495327	25.8268
						0.462366	26.2512
						0.44	28.3523
						0.612903	24.115
						0.609195	24.115
						0.590909	24.115
						0.613636	24.5451
						0.580247	23.6834
						0.576471	23.6834
						0.590361	24.5451
						0.615385	24.115
						0.575	23.6834
						0.585366	23.6834
						0.56962	23.6834
						0.558442	23.6834
						0.575	23.6834
						0.585366	24.5451
						0.590361	24.115
						0.575	24.115
						0.617977	23.2503
						0.585366	24.115
						0.609195	23.6834
						0.623529	24.115
						0.560976	24.115
						0.575	24.5451
						0.576471	24.5451
						0.595238	24.5451
						0.6	23.6834
						0.590361	24.115
						0.580247	23.6834
						0.6	23.6834
						0.5	26.6741
						0.397849	28.3523
						0.298969	27.9348
						0.550562	24.9738
						0.563218	24.9738
						0.622222	24.9738
						0.590909	24.5451
						0.590909	24.5451
						0.515789	26.6741
						0.578947	24.9738
						0.595745	23.6834
						0.55102	25.8268
						0.346535	27.5159
						0.578947	26.2512
						0.576471	24.5451
						0.581395	24.115
						0.581395	24.115
						0.586207	24.115
						0.595238	23.6834
						0.644444	24.115
						0.604651	24.115
						0.613636	23.6834
						0.581395	24.115
						0.590361	24.115
						0.604651	24.115
						0.614458	24.5451
						0.571429	24.5451
						0.609756	24.5451
						0.589744	24.115
						0.575	24.115
						0.6	23.6834
						0.6	23.6834
						0.580247	24.5451
						0.586207	24.115
						0.604651	23.6834
						0.6	23.6834
						0.609195	23.6834
						0.619048	23.6834
						0.604938	23.6834
						0.604651	24.115
						0.613636	24.5451
						0.571429	24.5451
						0.533333	26.2512
						0.425287	26.6741
						0.413043	24.9738
						0.555556	25.401
						0.511111	25.401
						0.586207	26.2512
						0.563218	25.8268
						0.52	26.6741
						0.535354	26.2512
						0.54	27.0957
						0.632653	24.5451
						0.54	26.2512
						0.553398	26.6741
						0.54902	26.2512
						0.46	26.6741
						0.528302	26.2512
						0.505155	27.0957
						0.472527	27.0957
						0.6	24.9738
						0.580247	24.5451
						0.595506	24.5451
						0.590909	24.5451
						0.590909	24.115
						0.609195	24.5451
						0.571429	24.5451
						0.604651	24.115
						0.558442	24.115
						0.604651	24.115
						0.564103	23.6834
						0.584416	24.115
						0.604938	23.6834
						0.56962	24.115
						0.619048	24.5451
						0.571429	23.6834
						0.613636	23.6834
						0.632184	24.115
						0.617977	24.115
						0.530864	24.5451
						0.560976	24.9738
						0.581395	23.6834
						0.612903	24.5451
						0.382979	26.6741
						0.55814	25.8268
						0.320388	27.5159
						0.456522	26.2512
						0.576471	25.401
						0.52381	25.401
						0.425926	27.0957
						0.5	26.6741
						0.505155	27.0957
						0.6	27.0957
						0.465347	27.5159
						0.591837	24.9738
						0.59596	25.401
						0.431579	27.5159
						0.495146	27.0957
						0.5	27.5159
						0.56701	25.8268
						0.58	25.8268
						0.583333	25.401
						0.069767	23.6834
						0.142857	24.5451
						0.55814	24.5451
						0.6	24.5451
						0.576471	24.5451
						0.555556	24.5451
						0.585366	24.5451
						0.580247	23.6834
						0.594937	24.115
						0.575	24.115
						0.552632	24.115
						0.552632	23.6834
						0.585366	23.6834
						0.604938	23.6834
						0.609195	23.6834
						0.584416	23.6834
						0.604651	24.115
						0.590909	23.6834
						0.621053	23.6834
						0.608696	23.6834
						0.609195	24.115
						0.590361	24.115
						0.585366	23.6834
						0.595506	24.5451
						0.494253	25.401
						0.460674	25.401
						0.511628	25.8268
						0.534884	27.0957
						0.511628	25.8268
						0.586207	24.9738
						0.595506	24.9738
						0.510204	26.6741
						0.533981	26.2512
						0.541667	26.6741
						0.608247	25.401
						0.553191	25.401
						0.6	26.2512
						0.423077	27.0957
						0.375	28.3523
						0.326316	30.8298
						0.595506	24.9738
						0.581395	23.6834
						0.609195	24.115
						0.571429	24.5451
						0.571429	24.115
						0.564103	23.6834
						0.56962	23.6834
						0.558442	23.6834
						0.552632	23.6834
						0.558442	23.2503
						0.564103	24.5451
						0.564103	23.6834
						0.558442	23.6834
						0.56962	23.6834
						0.575	24.115
						0.6	24.115
						0.566265	24.115
						0.575	23.6834
						0.585366	23.6834
						0.585366	23.6834
						0.604651	23.6834
						0.634409	24.115
						0.609195	24.5451
						0.645833	23.6834
						0.604396	23.6834
						0.623529	23.6834
						0.411765	24.9738
						0.326923	27.9348
						0.473684	28.3523
						0.723577	23.6834
						0.403509	24.9738
						0.509804	26.6741
						0.536842	25.8268
						0.504951	26.6741
						0.5625	25.8268
						0.604396	24.9738
						0.5625	25.401
						0.622222	25.401
						0.56044	25.401
						0.576471	24.5451
						0.525	24.115
						0.555556	24.5451
						0.585366	24.5451
						0.590909	24.5451
						0.575	24.5451
						0.555556	24.5451
						0.532468	24.115
						0.544304	24.115
						0.56962	23.6834
						0.56962	24.115
						0.584416	23.6834
						0.564103	24.115
						0.575	24.115
						0.580247	24.115
						0.555556	24.115
						0.558442	24.5451
						0.576471	24.115
						0.564103	23.6834
						0.580247	23.6834
						0.575	23.6834
						0.6	23.6834
						0.604651	24.115
						0.576471	24.115
						0.595506	23.6834
						0.595506	23.2503
						0.622222	23.6834
						0.622222	23.6834
						0.320755	29.1833
						0.395833	29.5969
						0.292929	26.2512
						0.296703	25.8268
						0.553191	25.8268
						0.510204	26.6741
						0.58	25.8268
						0.56701	26.2512
						0.571429	24.9738
						0.586207	24.5451
						0.617977	24.5451
						0.585366	24.115
						0.581395	24.5451
						0.55	24.5451
						0.560976	24.5451
						0.555556	24.5451
						0.566265	24.5451
						0.575	24.115
						0.55	24.115
						0.564103	24.5451
						0.55	24.115
						0.55	24.115
						0.580247	24.115
						0.575	24.115
						0.575	24.115
						0.564103	24.5451
						0.584416	24.115
						0.595238	24.5451
						0.595238	23.6834
						0.564103	24.115
						0.619048	24.115
						0.581395	23.6834
						0.590361	23.6834
						0.585366	23.6834
						0.558442	23.6834
						0.630435	23.2503
						0.634409	23.6834
						0.617977	24.115
						0.622222	24.5451
						0.604396	24.5451
						-0.029126	25.8268
						0.156863	31.2383
						0.403509	27.0957
						0.347826	28.3523
						0.5	27.9348
						0.404959	25.401
						0.617021	24.5451
						0.59596	25.8268
						0.585366	24.5451
						0.555556	24.9738
						0.544304	24.5451
						0.617977	24.9738
						0.581395	24.5451
						0.575	24.5451
						0.595238	24.9738
						0.555556	24.9738
						0.560976	24.9738
						0.576471	24.5451
						0.580247	24.5451
						0.580247	24.5451
						0.55	24.115
						0.580247	24.5451
						0.560976	24.115
						0.609756	24.115
						0.575	24.115
						0.580247	24.115
						0.555556	24.115
						0.585366	24.5451
						0.609756	24.115
						0.538462	23.6834
						0.564103	24.5451
						0.558442	24.5451
						0.538462	24.115
						0.571429	23.6834
						0.614458	24.115
						0.613636	24.115
						0.617977	24.115
						0.604651	24.115
						0.621053	24.115
						0.568182	24.5451
						0.530864	24.9738
						0.240741	30.0091
						0.422222	27.9348
						0.342105	27.5159
						0.370787	27.5159
						0.346939	27.9348
						0.483333	25.8268
						0.617977	25.401
						0.340426	27.9348
						0.604651	25.401
						0.560976	24.5451
						0.581395	24.5451
						0.566265	24.5451
						0.571429	24.115
						0.576471	24.115
						0.575	24.9738
						0.613636	24.5451
						0.555556	24.5451
						0.580247	24.5451
						0.590361	24.5451
						0.590361	24.115
						0.613636	24.115
						0.575	24.5451
						0.571429	24.5451
						0.560976	23.6834
						0.619048	24.115
						0.613636	24.115
						0.619048	24.115
						0.580247	24.115
						0.55	24.5451
						0.595238	23.6834
						0.575	24.115
						0.560976	24.5451
						0.544304	24.115
						0.580247	24.115
						0.580247	24.5451
						0.595506	24.5451
						0.622222	24.115
						0.613636	24.5451
						0.542169	24.5451
						0.580247	24.9738
						0.17037	30.0091
						0.125926	30.8298
						0.237288	28.7684
						0.490566	27.9348
						0.315789	27.5159
						0.402299	27.0957
						0.320388	28.7684
						0.461538	25.401
						0.538462	24.9738
						0.625	22.8157
						0.642105	25.401
						0.595238	24.5451
						0.55	24.5451
						0.571429	24.5451
						0.571429	24.9738
						0.580247	24.5451
						0.566265	24.5451
						0.55	24.5451
						0.555556	24.5451
						0.56962	24.115
						0.575	24.115
						0.585366	24.5451
						0.595238	24.5451
						0.585366	24.5451
						0.575	24.5451
						0.585366	24.5451
						0.609756	23.6834
						0.585366	24.5451
						0.619048	24.5451
						0.604938	24.5451
						0.594937	24.115
						0.580247	23.6834
						0.590361	24.115
						0.55	23.6834
						0.585366	24.115
						0.585366	24.5451
						0.532468	23.6834
						0.564103	24.5451
						0.627907	24.115
						0.590909	24.115
						0.6	24.9738
						0.542169	25.8268
						0.046729	26.6741
						0.286957	30.0091
						0.46	26.2512
						0.387755	26.6741
						0.287671	28.7684
						0.348315	27.9348
						0.376344	28.3523
						0.584906	26.2512
						0.616162	23.6834
						0.282051	24.9738
						0.290323	23.2503
						0.376623	25.8268
						0.595506	24.9738
						0.609195	24.9738
						0.542169	24.9738
						0.525	24.9738
						0.563218	24.5451
						0.571429	24.9738
						0.585366	24.9738
						0.581395	24.9738
						0.544304	24.5451
						0.581395	24.9738
						0.595238	24.5451
						0.576471	24.5451
						0.595506	24.115
						0.571429	24.115
						0.580247	24.115
						0.566265	24.5451
						0.560976	24.5451
						0.560976	24.5451
						0.590361	24.115
						0.590361	24.115
						0.56962	23.6834
						0.560976	24.5451
						0.595238	24.115
						0.590361	24.115
						0.604651	24.5451
						0.590361	23.6834
						0.640449	24.115
						0.6	23.6834
						0.566265	24.5451
						0.506173	24.9738
						0.268817	26.6741
						0.325843	27.5159
						0.416667	27.0957
						0.25	30.4201
						0.546392	25.8268
						0.318182	28.3523
						0.398058	25.401
						0.669565	23.6834
						0.2	22.8157
						0.230769	24.5451
						0.324675	26.2512
						0.333333	27.9348
						0.628866	24.5451
						0.6	24.5451
						0.386139	26.6741
						0.604651	24.5451
						0.560976	24.115
						0.560976	24.9738
						0.571429	24.9738
						0.586207	24.9738
						0.590361	24.5451
						0.614458	24.5451
						0.544304	24.9738
						0.619048	24.5451
						0.581395	24.5451
						0.571429	24.5451
						0.585366	24.5451
						0.595238	24.115
						0.566265	24.5451
						0.580247	23.6834
						0.581395	23.6834
						0.595238	24.5451
						0.6	24.5451
						0.56962	23.6834
						0.604938	23.6834
						0.636364	24.115
						0.613636	24.115
						0.630435	24.115
						0.632184	24.115
						0.6	24.5451
						0.560976	24.5451
						0.223529	27.0957
						0.345455	27.9348
						0.297297	28.7684
						0.661017	27.0957
						0.494949	23.6834
						0.267606	27.9348
						0.340426	27.5159
						0.340206	28.7684
						0.214953	27.9348
						0.4	26.2512
						0.382716	27.9348
						0.268293	29.5969
						0.460674	27.9348
						0.595506	24.9738
						0.582418	24.9738
						0.6	24.9738
						0.608696	24.9738
						0.580247	24.5451
						0.560976	24.5451
						0.571429	24.9738
						0.609195	24.9738
						0.585366	24.9738
						0.604651	24.9738
						0.604651	24.5451
						0.555556	24.5451
						0.604651	24.5451
						0.609195	24.5451
						0.604651	24.5451
						0.560976	24.115
						0.566265	24.5451
						0.576471	24.5451
						0.576471	24.115
						0.585366	24.5451
						0.560976	24.5451
						0.604651	24.115
						0.617977	24.115
						0.626374	23.6834
						0.617977	24.5451
						0.595506	24.115
						0.617977	24.5451
						0.56962	24.9738
						0.47619	25.401
						0.126984	30.8298
						0.393258	27.0957
						0.434343	26.2512
						0.326087	26.2512
						0.615385	23.6834
						0.348837	28.3523
						0.271028	29.1833
						0.360825	28.7684
						0.354167	27.0957
						0.623762	26.6741
						0.412844	24.9738
						0.406593	24.9738
						0.456	25.401
						0.581395	24.9738
						0.590909	24.9738
						0.581395	24.5451
						0.560976	24.9738
						0.586207	24.9738
						0.555556	24.9738
						0.595506	24.5451
						0.55814	24.9738
						0.609195	24.5451
						0.590361	24.5451
						0.595238	24.5451
						0.590361	24.9738
						0.576471	24.5451
						0.585366	24.5451
						0.585366	24.5451
						0.595506	24.115
						0.586207	24.115
						0.604651	24.115
						0.586207	24.115
						0.219512	28.7684
						0.126984	30.8298
						0.168142	29.1833
						0.657658	24.5451
						0.294118	28.3523
						0.657658	23.6834
						0.3125	25.8268
						0.355556	27.5159
						0.377778	28.7684
						0.268817	28.7684
						0.505376	24.5451
						0.4	24.115
						0.579832	27.9348
						0.382716	25.401
						0.541667	24.9738
						0.568182	24.9738
						0.506173	24.9738
						0.595506	24.5451
						0.563218	24.9738
						0.590909	24.5451
						0.395349	26.6741
						0.536842	23.6834
						0.438202	23.6834
						0.534884	23.6834
						0.487805	24.9738
						0.229358	28.7684
						0.6	24.9738
						0.55814	25.401
						0.545455	24.9738
						0.617021	24.5451
						0.5	26.2512
						0.233333	24.115
						0.093525	31.2383
						0.152	31.2383
						0.470588	27.5159
						0.681416	23.6834
						0.465347	26.2512
						0.294118	29.1833
						0.663717	23.6834
						0.333333	28.7684
						0.405941	27.0957
						0.378641	26.6741
						0.55102	24.9738
						0.266667	25.401
						0.288889	27.0957
						0.509434	24.9738
						0.419355	25.401
						0.282609	28.3523
						0.428571	25.8268
						0.319149	28.7684
						0.557895	27.0957
						0.318681	27.5159
						0.44086	26.6741
						0.448276	26.6741
						0.326316	28.3523
						0.372093	26.6741
						0.402299	27.5159
						0.274725	29.1833
						0.357143	30.0091
						0.534884	27.5159
						0.333333	27.9348
						0.414634	26.6741
						0.428571	27.0957
						0.435294	26.6741
						0.279279	30.8298
						0.145038	31.6455
						0.357143	29.1833
						0.44898	26.6741
						0.341176	27.9348
						0.619048	25.401
						0.358974	28.3523
						0.514019	25.401
						0.675214	24.5451
						0.333333	27.0957
						0.387755	24.9738
						0.341463	27.5159
						0.586207	24.9738
						0.292929	29.1833
						0.63964	23.6834
						0.596639	23.6834
						0.313131	27.0957
						0.252336	27.0957
						0.408451	25.401
						0.357143	25.8268
						0.52809	24.9738
						0.238095	28.3523
						0.493976	26.2512
						0.565217	25.8268
						0.348315	27.9348
						0.311111	27.9348
						0.573034	24.9738
						0.409091	25.401
						0.54023	25.8268
						0.563218	26.6741
						0.42029	24.5451
						0.536585	24.9738
						0.424	26.2512
						0.182609	30.4201
						0.574074	24.115
						0.304348	30.0091
						0.235294	30.4201
						0.381443	28.7684
						0.360825	28.7684
						0.570093	25.8268
						0.447619	26.6741
						0.449541	27.0957
						0.568627	26.2512
						0.206897	27.9348
						0.396226	25.8268
						0.428571	27.5159
						0.474747	27.5159
						0.2	30.4201
						0.490909	24.5451
						0.54717	24.5451
						0.272727	27.9348
						0.216	30.4201
						0.228346	29.1833
						0.176471	31.2383
						0.272727	26.2512
						0.450549	27.9348
						0.465347	29.5969
						0.140496	31.6455
						0.145038	31.2383
						0.267327	30.4201
						0.20339	30.8298
						0.306931	30.4201
						0.188119	29.5969
						0.566038	26.6741
						0.237113	27.0957
						0.565217	25.401
						0.444444	26.6741
						0.617021	24.9738
						0.486486	24.9738
						0.333333	28.3523
						0.56701	26.2512
						0.313131	29.5969
						0.196581	31.2383
						0.262136	27.5159
						0.27907	28.7684
						0.553191	26.2512
						-0.294118	24.5451
						0.106383	29.1833
						0.193277	30.4201
						0.391304	28.3523
						0.44086	27.5159
						0.291667	28.3523
						0.320388	27.0957
						0.505618	26.6741
						0.317647	27.9348
						0.297297	26.6741
						0.569892	27.0957
						-0.15	26.2512
						0.384615	27.5159

## Sheet: LST_NDVI_1996
					NDVI1996	LST1996
					0.187097	19.7298
					0.547619	20.1754
					0.56044	20.1754
					0.512195	20.6194
					0.581395	20.6194
					0.6	20.6194
					0.55814	20.6194
					0.555556	20.6194
					0.568182	20.6194
					0.506173	21.0619
					0.555556	21.0619
					0.525	21.0619
					0.542169	21.0619
					0.529412	21.0619
					0.576471	21.0619
					0.547619	21.0619
					0.52381	21.0619
					0.56044	21.0619
					0.563218	21.0619
					0.547619	21.0619
					0.604396	21.0619
					0.586957	21.0619
					0.522727	21.0619
					0.542169	21.0619
					0.425	21.0619
					0.55814	21.0619
					0.55814	21.0619
					0.581395	21.0619
					0.547619	21.0619
					0.55814	21.0619
					0.542169	21.0619
					0.55	21.0619
					0.542169	21.0619
					0.566265	21.0619
					0.577778	21.0619
					0.522727	21.0619
					0.566265	21.0619
					0.530864	21.0619
					0.576471	21.0619
					0.530864	21.0619
					0.55	21.0619
					0.566265	21.0619
					0.560976	21.0619
					0.547619	21.0619
					0.52381	21.5027
					0.52	21.5027
					0.487805	21.5027
					0.5	21.5027
					0.52381	21.5027
					0.571429	21.5027
					0.480519	21.5027
					0.5	21.5027
					0.525	21.5027
					0.563218	21.5027
					0.544304	21.5027
					0.525	21.5027
					0.52	21.5027
					0.512195	21.5027
					0.487805	21.5027
					0.518072	21.5027
					0.560976	21.5027
					0.532468	21.5027
					0.532468	21.5027
					0.582418	21.5027
					0.575	21.5027
					0.581395	21.5027
					0.591398	21.5027
					0.573034	21.5027
					0.52809	21.5027
					0.568182	21.5027
					0.547619	21.5027
					0.555556	21.5027
					0.512195	21.5027
					0.538462	21.5027
					0.55	21.5027
					0.560976	21.5027
					0.538462	21.5027
					0.536585	21.5027
					0.544304	21.5027
					0.525	21.5027
					0.536585	21.5027
					0.506173	21.5027
					0.486486	21.5027
					0.506173	21.5027
					0.571429	21.5027
					0.544304	21.5027
					0.536585	21.5027
					0.552941	21.5027
					0.536585	21.5027
					0.542169	21.5027
					0.547619	21.5027
					0.506494	21.5027
					0.276596	21.5027
					0.525	21.5027
					0.525	21.5027
					0.493671	21.5027
					0.493333	21.5027
					0.547619	21.5027
					0.518987	21.5027
					0.538462	21.5027
					0.525	21.5027
					0.538462	21.5027
					0.532468	21.5027
					0.518987	21.5027
					0.566265	21.5027
					0.560976	21.5027
					0.480519	21.5027
					0.544304	21.5027
					0.571429	21.5027
					0.544304	21.5027
					0.55	21.5027
					0.560976	21.5027
					0.56962	21.5027
					0.55814	21.5027
					0.454545	21.5027
					0.566265	21.5027
					0.525	21.5027
					0.538462	21.5027
					0.566265	21.5027
					0.55	21.5027
					0.547619	21.5027
					0.533333	21.5027
					0.54023	21.5027
					0.5	21.5027
					0.571429	21.5027
					0.571429	21.5027
					0.55	21.5027
					0.566265	21.5027
					0.544304	21.5027
					0.564103	21.5027
					0.530864	21.5027
					0.55814	21.5027
					0.571429	21.5027
					0.563218	21.5027
					0.536585	21.5027
					0.571429	21.5027
					0.55	21.5027
					0.566265	21.5027
					0.569892	21.5027
					0.581395	21.5027
					0.555556	21.5027
					0.552941	21.5027
					0.573034	21.5027
					0.560976	21.5027
					0.529412	21.5027
					0.511111	21.5027
					0.577778	21.5027
					0.46988	21.5027
					0.563218	21.5027
					0.555556	21.5027
					0.532468	21.5027
					0.518987	21.5027
					0.580247	21.5027
					0.56962	21.5027
					0.555556	21.5027
					0.525	21.5027
					0.560976	21.5027
					0.566265	21.5027
					0.552941	21.5027
					0.566265	21.5027
					0.547619	21.5027
					0.566265	21.5027
					0.55	21.5027
					0.560976	21.5027
					0.525	21.5027
					0.544304	21.5027
					0.518987	21.5027
					0.564103	21.5027
					0.564103	21.5027
					0.566265	21.5027
					0.555556	21.5027
					0.555556	21.5027
					0.563218	21.5027
					0.566265	21.5027
					0.585366	21.5027
					0.564103	21.5027
					0.566265	21.5027
					0.555556	21.5027
					0.571429	21.5027
					0.580247	21.5027
					0.571429	21.5027
					0.590909	21.5027
					0.595506	21.5027
					0.617021	21.5027
					0.555556	21.5027
					0.566265	21.5027
					0.555556	21.5027
					0.555556	21.5027
					0.571429	21.5027
					0.55	21.5027
					0.564103	21.5027
					0.571429	21.5027
					0.560976	21.5027
					0.575	21.5027
					0.573034	21.5027
					0.591398	21.5027
					0.566265	21.5027
					0.55814	21.5027
					0.566265	21.5027
					0.585366	21.5027
					0.590361	21.5027
					0.590361	21.5027
					0.558442	21.5027
					0.581395	21.5027
					0.568182	21.5027
					0.560976	21.5027
					0.55814	21.5027
					0.571429	21.5027
					0.573034	21.5027
					0.558442	21.5027
					0.589744	21.5027
					0.493976	21.5027
					0.52381	21.5027
					0.560976	21.5027
					0.580247	21.5027
					0.494253	21.5027
					0.475	21.9419
					0.530864	21.9419
					0.538462	21.9419
					0.39759	21.9419
					0.461538	21.9419
					0.55	21.9419
					0.506494	21.9419
					0.527778	21.9419
					0.532468	21.9419
					0.393258	21.9419
					0.546667	21.9419
					0.547619	21.9419
					0.534884	21.9419
					0.595506	21.9419
					0.580247	21.9419
					0.55	21.9419
					0.52	21.9419
					0.52381	21.9419
					0.536585	21.9419
					0.576471	21.9419
					0.564103	21.9419
					0.585366	21.9419
					0.506173	21.9419
					0.513514	21.9419
					0.530864	21.9419
					0.555556	21.9419
					0.512821	21.9419
					0.552941	21.9419
					0.526316	21.9419
					0.526316	21.9419
					0.571429	21.9419
					0.532468	21.9419
					0.560976	21.9419
					0.475	21.9419
					0.529412	21.9419
					0.461538	21.9419
					0.571429	21.9419
					0.55814	21.9419
					0.518987	21.9419
					0.461538	21.9419
					0.5	21.9419
					0.590909	21.9419
					0.525	21.9419
					0.538462	21.9419
					0.581395	21.9419
					0.563218	21.9419
					0.525	21.9419
					0.560976	21.9419
					0.538462	21.9419
					0.518987	21.9419
					0.518987	21.9419
					0.506494	21.9419
					0.473684	21.9419
					0.468354	21.9419
					0.518987	21.9419
					0.525	21.9419
					0.525	21.9419
					0.530864	21.9419
					0.538462	21.9419
					0.560976	21.9419
					0.555556	21.9419
					0.55	21.9419
					0.518072	21.9419
					0.544304	21.9419
					0.536585	21.9419
					0.52809	21.9419
					0.533333	21.9419
					0.525	21.9419
					0.571429	21.9419
					0.536585	21.9419
					0.536585	21.9419
					0.525	21.9419
					0.268817	21.9419
					0.505618	21.9419
					0.560976	21.9419
					0.538462	21.9419
					0.530864	21.9419
					0.564103	21.9419
					0.560976	21.9419
					0.564103	21.9419
					0.560976	21.9419
					0.542169	21.9419
					0.555556	21.9419
					0.544304	21.9419
					0.56962	21.9419
					0.580247	21.9419
					0.564103	21.9419
					0.526316	21.9419
					0.55	21.9419
					0.576471	21.9419
					0.576471	21.9419
					0.55814	21.9419
					0.555556	21.9419
					0.576471	21.9419
					0.522727	21.9419
					0.563218	21.9419
					0.52809	21.9419
					0.576471	21.9419
					0.560976	21.9419
					0.55	21.9419
					0.6	21.9419
					0.576471	21.9419
					0.55	21.9419
					0.617977	21.9419
					0.536585	21.9419
					0.550562	21.9419
					0.530864	21.9419
					0.542169	21.9419
					0.568182	21.9419
					0.538462	21.9419
					0.542169	21.9419
					0.571429	21.9419
					0.576471	21.9419
					0.480519	21.9419
					0.571429	21.9419
					0.571429	21.9419
					0.555556	21.9419
					0.525	21.9419
					0.511628	21.9419
					0.55814	21.9419
					0.532468	21.9419
					0.538462	21.9419
					0.552632	21.9419
					0.538462	21.9419
					0.571429	21.9419
					0.555556	21.9419
					0.595506	21.9419
					0.573034	21.9419
					0.536585	21.9419
					0.529412	21.9419
					0.505882	21.9419
					0.55	21.9419
					0.555556	21.9419
					0.555556	21.9419
					0.545455	21.9419
					0.522727	21.9419
					0.552941	21.9419
					0.536585	21.9419
					0.547619	21.9419
					0.525	21.9419
					0.571429	21.9419
					0.560976	21.9419
					0.555556	21.9419
					0.55814	21.9419
					0.538462	21.9419
					0.582418	21.9419
					0.555556	21.9419
					0.55	21.9419
					0.55	21.9419
					0.575	21.9419
					0.575	21.9419
					0.564103	21.9419
					0.580247	21.9419
					0.547619	21.9419
					0.566265	21.9419
					0.576471	21.9419
					0.604651	21.9419
					0.545455	21.9419
					0.566265	21.9419
					0.555556	21.9419
					0.585366	21.9419
					0.576471	21.9419
					0.6	21.9419
					0.595745	21.9419
					0.505882	21.9419
					0.52381	21.9419
					0.530864	21.9419
					0.55	21.9419
					0.560976	21.9419
					0.571429	21.9419
					0.555556	21.9419
					0.55	21.9419
					0.580247	21.9419
					0.560976	21.9419
					0.568182	21.9419
					0.518072	21.9419
					0.525	21.9419
					0.545455	21.9419
					0.566265	21.9419
					0.581395	21.9419
					0.576471	21.9419
					0.576471	21.9419
					0.555556	21.9419
					0.566265	21.9419
					0.564103	21.9419
					0.552632	21.9419
					0.564103	21.9419
					0.558442	21.9419
					0.590361	21.9419
					0.555556	21.9419
					0.552941	21.9419
					0.576471	21.9419
					0.576471	21.9419
					0.6	21.9419
					0.571429	21.9419
					0.576471	21.9419
					0.544304	21.9419
					0.558442	21.9419
					0.558442	21.9419
					0.544304	21.9419
					0.544304	21.9419
					0.544304	21.9419
					0.487805	21.9419
					0.568182	21.9419
					0.566265	21.9419
					0.575	21.9419
					0.586207	21.9419
					0.55	21.9419
					0.544304	21.9419
					0.529412	21.9419
					0.525	21.9419
					0.555556	21.9419
					-0.285714	21.9419
					0.563218	22.3795
					0.532468	22.3795
					0.404762	22.3795
					0.390244	22.3795
					0.421053	22.3795
					0.443038	22.3795
					0.525	22.3795
					0.555556	22.3795
					0.564103	22.3795
					0.532468	22.3795
					0.376344	22.3795
					0.555556	22.3795
					0.576471	22.3795
					0.571429	22.3795
					0.526316	22.3795
					0.505882	22.3795
					0.376344	22.3795
					0.47619	22.3795
					0.340909	22.3795
					0.552941	22.3795
					0.566265	22.3795
					0.563218	22.3795
					0.586207	22.3795
					0.586207	22.3795
					0.56962	22.3795
					0.580247	22.3795
					0.493976	22.3795
					0.604396	22.3795
					0.577778	22.3795
					0.493976	22.3795
					0.506173	22.3795
					0.552941	22.3795
					0.56962	22.3795
					0.544304	22.3795
					0.480519	22.3795
					0.52	22.3795
					0.513514	22.3795
					0.512821	22.3795
					0.538462	22.3795
					0.525	22.3795
					0.512821	22.3795
					0.530864	22.3795
					0.506494	22.3795
					0.370787	22.3795
					0.518072	22.3795
					0.555556	22.3795
					0.581395	22.3795
					0.576471	22.3795
					0.536585	22.3795
					0.544304	22.3795
					0.560976	22.3795
					0.555556	22.3795
					0.564103	22.3795
					0.544304	22.3795
					0.526316	22.3795
					0.560976	22.3795
					0.487805	22.3795
					0.480519	22.3795
					0.55	22.3795
					0.493976	22.3795
					0.506173	22.3795
					0.480519	22.3795
					0.487179	22.3795
					0.493671	22.3795
					0.525	22.3795
					0.522727	22.3795
					0.54023	22.3795
					0.530864	22.3795
					0.487179	22.3795
					0.525	22.3795
					0.493671	22.3795
					0.511111	22.3795
					0.545455	22.3795
					0.555556	22.3795
					0.473684	22.3795
					0.481481	22.3795
					0.518987	22.3795
					0.529412	22.3795
					0.547619	22.3795
					0.581395	22.3795
					0.544304	22.3795
					0.518987	22.3795
					0.566265	22.3795
					0.530864	22.3795
					0.534884	22.3795
					0.518072	22.3795
					0.530864	22.3795
					0.493671	22.3795
					0.5	22.3795
					0.542169	22.3795
					0.512195	22.3795
					0.55	22.3795
					0.547619	22.3795
					0.5	22.3795
					0.6	22.3795
					0.590909	22.3795
					0.566265	22.3795
					0.555556	22.3795
					0.536585	22.3795
					0.530864	22.3795
					0.505618	22.3795
					0.566265	22.3795
					0.560976	22.3795
					0.5	22.3795
					0.487179	22.3795
					0.418605	22.3795
					0.153846	22.3795
					0.469388	22.3795
					0.533333	22.3795
					0.576471	22.3795
					0.544304	22.3795
					0.55814	22.3795
					0.563218	22.3795
					0.530864	22.3795
					0.538462	22.3795
					0.518987	22.3795
					0.560976	22.3795
					0.560976	22.3795
					0.56962	22.3795
					0.56044	22.3795
					0.511111	22.3795
					0.439024	22.3795
					0.536585	22.3795
					0.555556	22.3795
					0.590361	22.3795
					0.575	22.3795
					0.550562	22.3795
					0.358025	22.3795
					0.560976	22.3795
					0.56962	22.3795
					0.580247	22.3795
					0.571429	22.3795
					0.560976	22.3795
					0.506173	22.3795
					0.547619	22.3795
					0.530864	22.3795
					0.544304	22.3795
					0.585366	22.3795
					0.566265	22.3795
					0.55	22.3795
					0.614458	22.3795
					0.552632	22.3795
					0.538462	22.3795
					0.544304	22.3795
					0.487179	22.3795
					0.402597	22.3795
					0.512195	22.3795
					0.536585	22.3795
					0.532468	22.3795
					0.566265	22.3795
					0.555556	22.3795
					0.586207	22.3795
					0.544304	22.3795
					0.546667	22.3795
					0.544304	22.3795
					0.540541	22.3795
					0.571429	22.3795
					0.358025	22.3795
					0.555556	22.3795
					0.55	22.3795
					0.55	22.3795
					0.530864	22.3795
					0.584416	22.3795
					0.555556	22.3795
					0.536585	22.3795
					0.468354	22.3795
					0.487179	22.3795
					0.560976	22.3795
					0.512821	22.3795
					0.564103	22.3795
					0.46988	22.8157
					0.530864	22.8157
					0.407407	22.8157
					0.530864	22.8157
					0.487805	22.8157
					0.357143	22.8157
					0.45	22.8157
					0.4	22.8157
					0.4	22.8157
					0.5	22.8157
					0.454545	22.8157
					0.327103	22.8157
					0.534884	22.8157
					0.14	22.8157
					0.480519	22.8157
					0.5	22.8157
					0.52	22.8157
					0.513514	22.8157
					0.506494	22.8157
					0.525	22.8157
					0.566265	22.8157
					0.532468	22.8157
					0.585366	22.8157
					0.52	22.8157
					0.581395	22.8157
					0.542169	22.8157
					0.56044	22.8157
					0.586207	22.8157
					0.555556	22.8157
					0.506173	22.8157
					0.552941	22.8157
					0.192661	22.8157
					0.513514	22.8157
					0.55814	22.8157
					0.545455	22.8157
					0.576471	22.8157
					0.586207	22.8157
					0.55814	22.8157
					0.542169	22.8157
					0.552941	22.8157
					0.566265	22.8157
					0.566265	22.8157
					0.425	22.8157
					0.506173	22.8157
					0.487179	22.8157
					0.468354	22.8157
					0.487179	22.8157
					0.4	22.8157
					0.265306	22.8157
					0.375	22.8157
					0.544304	22.8157
					0.530864	22.8157
					0.526316	22.8157
					0.417722	22.8157
					0.407407	22.8157
					0.511628	22.8157
					0.585366	22.8157
					0.536585	22.8157
					0.5	22.8157
					0.5	22.8157
					0.347368	22.8157
					0.52381	22.8157
					0.563218	22.8157
					0.563218	22.8157
					0.421687	22.8157
					0.480519	22.8157
					0.377778	22.8157
					0.422222	22.8157
					0.534884	22.8157
					0.54023	22.8157
					0.512195	22.8157
					0.52381	22.8157
					0.534884	22.8157
					0.566265	22.8157
					0.530864	22.8157
					0.5	22.8157
					0.52381	22.8157
					0.518072	22.8157
					0.576471	22.8157
					0.590909	22.8157
					0.494253	22.8157
					0.533333	22.8157
					0.5	22.8157
					0.47619	22.8157
					0.55814	22.8157
					0.545455	22.8157
					0.462366	22.8157
					0.524752	22.8157
					0.525773	22.8157
					0.569892	22.8157
					0.536585	22.8157
					0.463415	22.8157
					0.483146	22.8157
					0.44186	22.8157
					0.384615	22.8157
					0.47619	22.8157
					0.489362	22.8157
					0.55814	22.8157
					0.577778	22.8157
					0.263158	22.8157
					0.553191	22.8157
					0.466667	22.8157
					0.544304	22.8157
					0.536585	22.8157
					0.555556	22.8157
					-0.058824	22.8157
					0.406593	22.8157
					0.576471	22.8157
					0.560976	22.8157
					0.560976	22.8157
					0.555556	22.8157
					0.534884	22.8157
					0.45679	22.8157
					0.595506	22.8157
					0.571429	22.8157
					0.475	22.8157
					0.5	22.8157
					0.5	22.8157
					0.39759	22.8157
					0.566265	22.8157
					0.566265	22.8157
					0.530864	22.8157
					0.581395	22.8157
					0.590909	22.8157
					0.581395	22.8157
					0.566265	22.8157
					0.566265	22.8157
					0.571429	22.8157
					0.532468	22.8157
					0.544304	22.8157
					0.544304	22.8157
					0.454545	22.8157
					0.544304	22.8157
					0.525	22.8157
					0.542169	22.8157
					0.536585	22.8157
					0.530864	22.8157
					0.542169	22.8157
					0.530864	22.8157
					0.55	22.8157
					0.532468	22.8157
					0.525	22.8157
					0.518987	22.8157
					0.544304	22.8157
					0.530864	22.8157
					0.55	22.8157
					0.512821	22.8157
					0.518987	22.8157
					0.544304	22.8157
					0.586207	22.8157
					0.55	22.8157
					0.481481	22.8157
					0.402597	22.8157
					0.552941	22.8157
					0.506173	22.8157
					0.55	22.8157
					0.530864	22.8157
					0.464789	22.8157
					0.444444	22.8157
					0.5	22.8157
					-0.125	22.8157
					0.518072	23.2503
					0.487179	23.2503
					0.586957	23.2503
					0.472222	23.2503
					0.370787	23.2503
					0.355556	23.2503
					0.493671	23.2503
					0.493671	23.2503
					0.506494	23.2503
					0.432099	23.2503
					0.506494	23.2503
					0.237113	23.2503
					0.45	23.2503
					0.621053	23.2503
					0.532468	23.2503
					0.5	23.2503
					0.432099	23.2503
					0.244444	23.2503
					0.220779	23.2503
					0.447368	23.2503
					0.454545	23.2503
					0.486486	23.2503
					0.486486	23.2503
					0.486486	23.2503
					0.55814	23.2503
					0.525	23.2503
					0.512195	23.2503
					0.512821	23.2503
					0.55	23.2503
					0.536585	23.2503
					0.506173	23.2503
					0.547619	23.2503
					0.542169	23.2503
					0.512821	23.2503
					0.487179	23.2503
					0.525	23.2503
					0.530864	23.2503
					0.590909	23.2503
					0.506173	23.2503
					0.536585	23.2503
					0.493671	23.2503
					0.550562	23.2503
					0.518072	23.2503
					0.506173	23.2503
					0.494253	23.2503
					0.46988	23.2503
					0.443038	23.2503
					0.545455	23.2503
					0.52381	23.2503
					0.542169	23.2503
					0.506494	23.2503
					0.534884	23.2503
					0.518072	23.2503
					0.542169	23.2503
					0.506173	23.2503
					0.542169	23.2503
					0.55814	23.2503
					0.487805	23.2503
					0.568182	23.2503
					0.542169	23.2503
					0.586207	23.2503
					0.552941	23.2503
					0.552941	23.2503
					0.5	23.2503
					0.525	23.2503
					0.555556	23.2503
					0.55	23.2503
					0.36	23.2503
					0.136	23.2503
					0.309524	23.2503
					0.5	23.2503
					0.5	23.2503
					0.52809	23.2503
					0.542169	23.2503
					0.530864	23.2503
					0.544304	23.2503
					0.538462	23.2503
					0.284404	23.2503
					0.402299	23.2503
					0.448276	23.2503
					0.52809	23.2503
					0.555556	23.2503
					0.536585	23.2503
					0.55	23.2503
					0.54023	23.2503
					0.534884	23.2503
					0.313726	23.2503
					0.493976	23.2503
					0.560976	23.2503
					0.560976	23.2503
					0.55814	23.2503
					0.576471	23.2503
					0.450549	23.2503
					0.525	23.2503
					0.367347	23.2503
					0.534884	23.2503
					0.568182	23.2503
					0.547619	23.2503
					0.452632	23.2503
					0.571429	23.2503
					0.482353	23.2503
					0.52809	23.2503
					0.55814	23.2503
					0.586207	23.2503
					0.425287	23.2503
					0.505618	23.2503
					0.52381	23.2503
					0.536585	23.2503
					0.477273	23.2503
					0.534884	23.2503
					0.569892	23.2503
					0.5	23.2503
					0.407407	23.2503
					0.493976	23.2503
					0.377778	23.2503
					0.425287	23.2503
					0.494737	23.2503
					0.460674	23.2503
					0.494253	23.2503
					0.482353	23.2503
					0.536585	23.2503
					0.340909	23.2503
					0.377778	23.2503
					0.44086	23.2503
					-0.046729	23.2503
					0.445783	23.2503
					0.542169	23.2503
					0.530864	23.2503
					0.536585	23.2503
					0.525	23.2503
					0.518987	23.2503
					0.468354	23.2503
					0.428571	23.2503
					0.5	23.2503
					0.512821	23.2503
					0.530864	23.2503
					0.580247	23.2503
					0.536585	23.2503
					0.518987	23.2503
					0.532468	23.2503
					0.529412	23.2503
					0.435897	23.2503
					0.475	23.2503
					0.45679	23.2503
					0.512821	23.2503
					0.532468	23.2503
					0.518987	23.2503
					0.493671	23.2503
					0.493333	23.2503
					0.45679	23.2503
					0.417722	23.2503
					0.487805	23.2503
					0.465116	23.2503
					0.46988	23.2503
					0.414634	23.2503
					0.308642	23.2503
					0.367089	23.6834
					0.298969	23.6834
					0.180328	23.6834
					0.223301	23.6834
					0.410256	23.6834
					0.445783	23.6834
					0.439024	23.6834
					0.182796	23.6834
					0.432432	23.6834
					0.538462	23.6834
					0.542169	23.6834
					0.52381	23.6834
					0.512821	23.6834
					0.547619	23.6834
					0.480519	23.6834
					0.480519	23.6834
					0.547619	23.6834
					0.512821	23.6834
					0.5	23.6834
					0.529412	23.6834
					0.511628	23.6834
					0.418605	23.6834
					0.165049	23.6834
					0.402299	23.6834
					0.536585	23.6834
					0.536585	23.6834
					0.555556	23.6834
					0.542169	23.6834
					0.25	23.6834
					0.351351	23.6834
					0.45679	23.6834
					0.5	23.6834
					0.547619	23.6834
					0.482353	23.6834
					0.52381	23.6834
					0.552941	23.6834
					0.555556	23.6834
					0.276596	23.6834
					0.421687	23.6834
					0.377778	23.6834
					0.428571	23.6834
					0.46988	23.6834
					0.52381	23.6834
					0.566265	23.6834
					0.395349	23.6834
					0.494253	23.6834
					0.552941	23.6834
					0.552941	23.6834
					0.568182	23.6834
					0.432099	23.6834
					0.552941	23.6834
					0.530864	23.6834
					0.518987	23.6834
					0.4	23.6834
					0.185185	23.6834
					0.145833	23.6834
					0.565217	23.6834
					0.41573	23.6834
					0.125	23.6834
					0.348315	23.6834
					0.448276	23.6834
					0.439024	23.6834
					0.411765	23.6834
					0.483871	23.6834
					0.443038	23.6834
					0.505376	23.6834
					0.518072	23.6834
					0.454545	23.6834
					0.340426	23.6834
					0.446809	23.6834
					0.458824	23.6834
					0.526882	23.6834
					0.471264	23.6834
					0.353535	23.6834
					0.406593	23.6834
					0.510638	23.6834
					0.450549	23.6834
					0.357143	23.6834
					0.428571	23.6834
					0.368421	23.6834
					0.376623	23.6834
					0.481481	23.6834
					0.55	23.6834
					0.388235	23.6834
					0.417722	23.6834
					0.358974	23.6834
					0.530864	23.6834
					0.525	23.6834
					0.428571	23.6834
					0.410256	23.6834
					0.287671	23.6834
					0.439024	23.6834
					0.404762	23.6834
					0.506173	23.6834
					0.355556	23.6834
					0.36	23.6834
					0.392405	24.115
					0.362637	24.115
					0.380952	24.115
					0.356322	24.115
					0.356322	24.115
					0.100917	24.115
					0.518072	24.115
					0.463415	24.115
					0.428571	24.115
					0.506173	24.115
					0.45679	24.115
					0.463415	24.115
					0.493976	24.115
					0.54023	24.115
					0.542169	24.115
					0.475	24.115
					0.518072	24.115
					0.552941	24.115
					0.542169	24.115
					0.506173	24.115
					0.525	24.115
					0.506173	24.115
					0.506173	24.115
					0.52381	24.115
					0.55814	24.115
					0.555556	24.115
					0.160714	24.115
					0.393258	24.115
					0.5	24.115
					0.512195	24.115
					0.5	24.115
					0.536585	24.115
					0.512195	24.115
					0.529412	24.115
					0.482353	24.115
					0.487805	24.115
					0.512195	24.115
					0.505882	24.115
					0.506173	24.115
					0.566265	24.115
					0.319149	24.115
					0.252525	24.115
					0.319149	24.115
					0.414634	24.115
					0.529412	24.115
					0.461538	24.115
					0.397849	24.115
					0.435294	24.115
					0.463415	24.115
					0.454545	24.115
					0.388235	24.115
					0.382716	24.115
					0.481481	24.115
					0.428571	24.115
					0.4	24.115
					0.534884	24.115
					0.54023	24.115
					0.529412	24.115
					0.290323	24.115
					0.431818	24.115
					0.445783	24.115
					0.431818	24.115
					0.472527	24.115
					0.520833	24.115
					0.466667	24.115
					0.422222	24.115
					0.458333	24.115
					0.505618	24.115
					0.370787	24.115
					0.468085	24.115
					0.538462	24.115
					0.456522	24.115
					0.5	24.115
					0.5	24.115
					0.478261	24.115
					0.454545	24.115
					0.28	24.115
					0.281553	24.115
					0.483871	24.115
					0.494505	24.115
					0.466667	24.115
					0.471264	24.115
					0.434783	24.115
					0.516484	24.115
					0.462366	24.115
					0.145833	24.115
					0.454545	24.115
					0.341463	24.115
					0.333333	24.115
					0.325843	24.115
					0.445783	24.115
					0.225806	24.115
					0.258427	24.115
					0.325843	24.115
					0.432099	24.115
					0.363636	24.115
					0.318681	24.115
					0.465116	24.115
					0.370787	24.115
					0.404255	24.115
					0.370787	24.115
					0.307692	24.115
					0.216495	24.5451
					0.137931	24.5451
					0.39759	24.5451
					0.375	24.5451
					0.333333	24.5451
					0.454545	24.5451
					0.443038	24.5451
					0.411765	24.5451
					0.5	24.5451
					0.488372	24.5451
					0.41573	24.5451
					0.493976	24.5451
					0.384615	24.5451
					0.37931	24.5451
					0.452381	24.5451
					0.46988	24.5451
					0.475	24.5451
					0.395349	24.5451
					0.439024	24.5451
					0.435897	24.5451
					0.5	24.5451
					0.481481	24.5451
					0.475	24.5451
					0.44186	24.5451
					0.493976	24.5451
					0.47619	24.5451
					0.482353	24.5451
					0.435294	24.5451
					0.192982	24.5451
					0.463415	24.5451
					0.505882	24.5451
					0.506173	24.5451
					0.221239	24.5451
					0.493976	24.5451
					0.505882	24.5451
					0.319149	24.5451
					0.448276	24.5451
					0.5	24.5451
					0.281553	24.5451
					0.463415	24.5451
					0.529412	24.5451
					0.204301	24.5451
					0.244444	24.5451
					0.253012	24.5451
					0.377778	24.5451
					0.252525	24.5451
					0.533333	24.5451
					0.393258	24.5451
					0.494737	24.5451
					0.546392	24.5451
					0.458333	24.5451
					0.233645	24.5451
					0.373737	24.5451
					0.495146	24.5451
					0.428571	24.5451
					0.468085	24.5451
					0.185185	24.5451
					0.463415	24.5451
					0.402299	24.5451
					0.444444	24.5451
					0.227273	24.5451
					0.479167	24.5451
					0.296703	24.5451
					0.166667	24.5451
					0.347826	24.5451
					0.2	24.5451
					0.208333	24.5451
					0.341772	24.5451
					0.266055	24.5451
					0.445545	24.5451
					0.26087	24.5451
					0.4	24.5451
					0.268817	24.5451
					0.290323	24.9738
					0.163265	24.9738
					0.4	24.9738
					0.255319	24.9738
					0.46988	24.9738
					0.131148	24.9738
					0.28	24.9738
					0.409091	24.9738
					0.494253	24.9738
					0.247312	24.9738
					0.121951	24.9738
					0.365854	24.9738
					0.439024	24.9738
					0.428571	24.9738
					0.533333	24.9738
					0.252747	24.9738
					0.505618	24.9738
					0.494737	24.9738
					0.326087	24.9738
					0.235294	24.9738
					0.292929	24.9738
					0.39759	24.9738
					0.4	24.9738
					0.425287	24.9738
					0.306122	24.9738
					0.216495	24.9738
					0.16129	24.9738
					0.304348	24.9738
					0.22807	24.9738
					0.235955	24.9738
					0.22449	24.9738
					0.2	24.9738
					0.393258	24.9738
					0.18	24.9738
					0.271028	24.9738
					0.321429	24.9738
					0.326733	24.9738
					0.380952	24.9738
					0.235294	24.9738
					0.267857	24.9738
					0.478261	24.9738
					0.230769	24.9738
					0.341176	24.9738
					0.255319	24.9738
					0.247312	24.9738
					0.296703	24.9738
					0.346535	24.9738
					0.212766	24.9738
					0.296703	24.9738
					0.227723	24.9738
					0.095238	24.9738
					0.389474	24.9738
					0.301205	25.401
					0.211538	25.401
					0.225806	25.401
					0.232558	25.401
					0.204082	25.401
					0.015625	25.401
					0.384615	25.401
					0.4	25.401
					0.207921	25.401
					0.393258	25.401
					0.134021	25.401
					0.45098	25.401
					0.222222	25.401
					0.12	25.401
					0.161905	25.401
					0.207921	25.401
					0.287356	25.401
					0.260504	25.401
					0.235294	25.401
					0.223301	25.401
					0.274725	25.401
					0.244444	25.401
					0.23913	25.401
					0.296296	25.401
					0.283019	25.401
					0.347826	25.401
					0.210526	25.401
					0.267327	25.401
					0.262136	25.401
					0.296296	25.401
					0.112903	25.8268
					0.191489	25.8268
					0.266667	25.8268
					0.188119	25.8268
					0.232323	25.8268
					0.227723	25.8268
					0.010989	25.8268
					0.089286	25.8268
					0.439024	25.8268
					0.219048	25.8268
					0.207921	25.8268
					0.196078	25.8268
					0.232323	25.8268
					0.161905	25.8268
					0.27619	25.8268
					0.196429	25.8268
					0.191011	25.8268
					0.230769	25.8268
					0.183673	25.8268
					0.318681	25.8268
					0.2	25.8268
					0.163934	25.8268
					0.25	25.8268
					0.086614	25.8268
					0.122449	26.2512
					0.113402	26.2512
					0.22449	26.2512
					0.325581	26.2512
					0.360825	26.2512
					0.106796	26.2512
					0.339806	26.2512
					0.214953	26.2512
					0.388235	26.2512
					0.319149	26.2512
					0.203704	26.2512
					0.155172	26.2512
					0.156863	26.2512
					0.211538	26.2512
					0.169811	26.2512
					0.148148	26.2512
					0.181818	26.2512
					0.185185	26.2512
					0.169811	26.2512
					0.192661	26.2512
					0.169811	26.2512
					0.264151	26.2512
					0.151515	26.2512
					0.203704	26.2512
					0.171171	26.2512
					0.161905	26.2512
					0.227273	26.2512
					0.208791	26.2512
					0.068965	26.2512
					0.165049	26.2512
					0.189655	26.2512
					0.207207	26.2512
					0.2	26.2512
					0.204819	26.2512
					0.160714	26.2512
					0.182609	26.2512
					0.137931	26.6741
					0.235955	26.6741
					0.270833	26.6741
					0.276596	26.6741
					0.081967	26.6741
					0.192661	26.6741
					0.2	26.6741
					0.145455	26.6741
					0.150442	26.6741
					0.254545	26.6741
					0.208333	26.6741
					0.152174	26.6741
					0.227273	26.6741
					0.142857	26.6741
					0.148148	26.6741
					0.102804	26.6741
					0.24	26.6741
					0.215686	26.6741
					0.168317	26.6741
					0.117647	26.6741
					0.094017	26.6741
					0.24	26.6741
					0.140187	26.6741
					0.181818	26.6741
					0.178571	26.6741
					0.164835	26.6741
					0.247706	26.6741
					0.188119	26.6741
					0.107143	26.6741
					0.178947	26.6741
					0.186813	26.6741
					0.185185	26.6741
					0.207207	26.6741
					0.238095	26.6741
					0.163265	26.6741
					0.152	26.6741
					0.142857	26.6741
					0.159664	26.6741
					0.153846	26.6741
					0.214286	26.6741
					0.157895	26.6741
					0.284404	26.6741
					0.171717	26.6741
					0.207207	26.6741
					0.083333	26.6741
					0.153846	26.6741
					0.107438	26.6741
					0.152542	26.6741
					0.188679	26.6741
					0.272727	27.0957
					0.178947	27.0957
					0.142857	27.0957
					0.12381	27.0957
					0.264151	27.0957
					0.055118	27.0957
					0.230769	27.0957
					0.148515	27.0957
					0.140351	27.0957
					0.14	27.0957
					0.314815	27.0957
					0.140351	27.0957
					0.171171	27.0957
					0.145631	27.0957
					0.227723	27.0957
					0.162791	27.0957
					0.137931	27.0957
					0.140187	27.0957
					0.22	27.0957
					0.117647	27.0957
					0.037037	27.0957
					0.111111	27.0957
					0.150442	27.0957
					0.128205	27.0957
					0.163934	27.0957
					0.137615	27.0957
					0.189655	27.0957
					0.169811	27.0957
					0.092437	27.0957
					0.116667	27.0957
					0.136	27.0957
					0.140187	27.0957
					0.148148	27.0957
					0.127273	27.0957
					0.159664	27.0957
					0.090909	27.0957
					0.066667	27.0957
					0.112782	27.0957
					0.319149	27.5159
					0.226415	27.5159
					0.204819	27.5159
					0.111111	27.5159
					0.174312	27.5159
					0.207547	27.5159
					-0.017544	27.5159
					0.095238	27.5159
					0.127273	27.5159
					0.168317	27.5159
					0.153846	27.5159
					0.086207	27.5159
					0.153153	27.5159
					0.155963	27.5159
					0.195876	27.5159
					0.140187	27.5159
					0.119266	27.5159
					0.111111	27.5159
					0.152542	27.5159
					0.106383	27.5159
					0.126214	27.9348
					0.207547	27.9348
					0.203883	27.9348
					0.162393	27.9348
					0.109244	27.9348
					0.084746	28.3523
					0.122807	28.3523
					0.086614	28.3523
					0.066667	28.3523
					0.15493	28.7684
					0.054054	28.7684
					0.137255	28.7684
					0.111111	29.1833

## Sheet: LST_NDVI2009
				NDVI2009	LST2009
				0.460674	27.0957
				0.510638	27.0957
				0.489362	27.0957
				0.54	27.0957
				0.515789	27.0957
				0.5	27.0957
				0.483871	27.0957
				0.5	27.0957
				0.515152	27.0957
				0.488889	27.0957
				0.5	27.0957
				0.494505	27.0957
				0.52	27.0957
				0.54	27.0957
				0.533981	27.0957
				0.111111	27.0957
				0.245902	27.0957
				0.5	27.0957
				0.533981	27.0957
				0.504951	27.0957
				0.52	27.0957
				0.349398	27.0957
				0.479167	27.5159
				0.484536	27.5159
				0.468085	27.5159
				0.472527	27.5159
				0.450549	27.5159
				0.483871	27.5159
				0.489362	27.5159
				0.466667	27.5159
				0.479167	27.5159
				0.479167	27.5159
				0.488889	27.5159
				0.505376	27.5159
				0.483871	27.5159
				0.477273	27.5159
				0.471264	27.5159
				0.454545	27.5159
				0.466667	27.5159
				0.465116	27.5159
				0.494505	27.5159
				0.477273	27.5159
				0.5	27.5159
				0.478261	27.5159
				0.505155	27.5159
				0.494737	27.5159
				0.472527	27.5159
				0.460674	27.5159
				0.505376	27.5159
				0.466667	27.5159
				0.505376	27.5159
				0.5	27.5159
				0.5	27.5159
				0.494253	27.5159
				0.494737	27.5159
				0.505376	27.5159
				0.494737	27.5159
				0.472527	27.5159
				0.466667	27.5159
				0.494505	27.5159
				0.483871	27.5159
				0.488889	27.5159
				0.505618	27.5159
				0.510638	27.5159
				0.510638	27.5159
				0.515789	27.5159
				0.478261	27.5159
				0.478261	27.5159
				0.478261	27.5159
				0.520833	27.5159
				0.484536	27.5159
				0.479167	27.5159
				0.472527	27.5159
				0.472527	27.5159
				0.505376	27.5159
				0.472527	27.5159
				0.489362	27.5159
				0.494505	27.5159
				0.494505	27.5159
				0.5	27.5159
				0.494737	27.5159
				0.510638	27.5159
				0.489362	27.5159
				0.505155	27.5159
				0.253333	27.5159
				0.494737	27.5159
				0.428571	27.5159
				0.41573	27.5159
				0.489362	27.5159
				0.478261	27.5159
				0.460674	27.5159
				0.510638	27.5159
				0.494505	27.5159
				0.505376	27.5159
				0.510638	27.5159
				0.520833	27.5159
				0.5	27.5159
				0.521739	27.5159
				0.515789	27.5159
				0.454545	27.5159
				0.483871	27.5159
				0.494737	27.5159
				0.494505	27.5159
				0.488889	27.5159
				0.494737	27.5159
				0.4375	27.5159
				0.452632	27.5159
				0.484536	27.5159
				0.456522	27.5159
				0.489362	27.5159
				0.505376	27.5159
				0.510638	27.5159
				0.5	27.5159
				0.505376	27.5159
				0.520833	27.5159
				0.515789	27.5159
				0.494737	27.5159
				0.526882	27.5159
				0.494505	27.5159
				0.494505	27.5159
				0.428571	27.5159
				0.468085	27.5159
				0.468085	27.5159
				0.479167	27.5159
				0.483871	27.5159
				0.494737	27.5159
				0.515789	27.5159
				0.515789	27.5159
				0.494505	27.5159
				0.510638	27.5159
				0.515789	27.5159
				0.520833	27.5159
				0.520833	27.5159
				0.483871	27.5159
				0.536842	27.5159
				0.460674	27.5159
				0.444444	27.5159
				0.477273	27.5159
				0.494505	27.5159
				0.505376	27.5159
				0.44086	27.5159
				0.456522	27.5159
				0.468085	27.5159
				0.489796	27.5159
				0.452632	27.5159
				0.5	27.5159
				0.489362	27.5159
				0.525773	27.5159
				0.494737	27.5159
				0.536842	27.5159
				0.468085	27.5159
				0.452632	27.5159
				0.505155	27.5159
				0.478261	27.5159
				0.483146	27.5159
				0.471264	27.5159
				0.488889	27.5159
				0.505376	27.5159
				0.5	27.5159
				0.422222	27.5159
				0.505155	27.5159
				0.525773	27.5159
				0.483871	27.5159
				0.505376	27.5159
				0.494505	27.5159
				0.471264	27.5159
				0.488889	27.5159
				0.488889	27.5159
				0.494505	27.5159
				0.477273	27.5159
				0.462366	27.5159
				0.489796	27.5159
				0.510204	27.5159
				0.505155	27.5159
				0.525773	27.5159
				0.515789	27.5159
				0.494505	27.5159
				0.456522	27.5159
				0.5	27.5159
				0.494505	27.5159
				0.488889	27.5159
				0.466667	27.5159
				0.483871	27.5159
				0.479167	27.5159
				0.505376	27.5159
				0.515789	27.5159
				0.505376	27.5159
				0.484536	27.5159
				0.483871	27.5159
				0.505376	27.5159
				0.483871	27.5159
				0.468085	27.5159
				0.446809	27.5159
				0.478261	27.5159
				0.483871	27.5159
				0.466667	27.5159
				0.5	27.5159
				0.479167	27.5159
				0.456522	27.5159
				0.483871	27.5159
				0.483871	27.5159
				0.454545	27.5159
				0.478261	27.5159
				0.466667	27.5159
				0.478261	27.5159
				0.489362	27.5159
				0.489362	27.5159
				0.478261	27.5159
				0.483871	27.5159
				0.483871	27.5159
				0.489362	27.5159
				0.515789	27.5159
				0.488889	27.5159
				0.494737	27.5159
				0.472527	27.5159
				0.479167	27.5159
				0.5	27.5159
				0.489362	27.5159
				0.5	27.5159
				0.472527	27.5159
				0.505376	27.5159
				0.515789	27.5159
				0.483146	27.5159
				0.466667	27.5159
				0.477273	27.5159
				0.483146	27.5159
				0.473684	27.5159
				0.520833	27.5159
				0.5	27.5159
				0.494737	27.5159
				0.494737	27.5159
				0.5	27.5159
				0.472527	27.5159
				0.483146	27.5159
				0.472527	27.5159
				0.5	27.5159
				0.488889	27.5159
				0.473684	27.5159
				0.489362	27.5159
				0.489362	27.5159
				0.505155	27.5159
				0.472527	27.5159
				0.483871	27.5159
				0.466667	27.5159
				0.469388	27.5159
				0.450549	27.5159
				0.52	27.5159
				0.515789	27.5159
				0.479167	27.5159
				0.510204	27.5159
				0.494505	27.5159
				0.494505	27.5159
				0.505155	27.5159
				0.494737	27.5159
				0.484536	27.5159
				0.494737	27.5159
				0.494737	27.5159
				0.483871	27.5159
				0.494737	27.5159
				0.505376	27.5159
				0.511111	27.5159
				0.463918	27.5159
				0.473684	27.5159
				0.483871	27.5159
				0.505376	27.5159
				0.483871	27.5159
				0.488889	27.5159
				0.515789	27.5159
				0.505155	27.5159
				0.494737	27.5159
				0.479167	27.5159
				0.446809	27.5159
				0.5	27.5159
				0.462366	27.5159
				0.473684	27.5159
				0.515789	27.5159
				0.494949	27.5159
				0.489796	27.5159
				0.483146	27.5159
				0.465116	27.5159
				0.494505	27.5159
				0.5	27.5159
				0.517241	27.5159
				0.505376	27.5159
				0.473684	27.5159
				0.483871	27.5159
				0.5	27.5159
				0.474747	27.5159
				0.510204	27.5159
				0.505376	27.5159
				0.5	27.5159
				0.477273	27.5159
				0.477273	27.5159
				0.505618	27.5159
				0.505376	27.5159
				0.483871	27.5159
				0.5	27.5159
				0.510204	27.5159
				0.505155	27.5159
				0.510204	27.5159
				0.515789	27.5159
				0.5	27.5159
				0.5	27.5159
				0.478261	27.5159
				0.511111	27.5159
				0.5	27.5159
				0.526882	27.5159
				0.5	27.5159
				0.515789	27.5159
				0.5	27.5159
				0.510638	27.5159
				0.510638	27.5159
				0.526882	27.5159
				0.521739	27.5159
				0.484536	27.5159
				0.489362	27.5159
				0.489796	27.5159
				0.463918	27.5159
				0.529412	27.5159
				0.5	27.5159
				0.510638	27.5159
				0.5	27.5159
				0.510638	27.5159
				0.515789	27.5159
				0.488889	27.5159
				0.510638	27.5159
				0.488889	27.5159
				0.488889	27.5159
				0.516484	27.5159
				0.489362	27.5159
				0.516484	27.5159
				0.494253	27.5159
				0.505618	27.5159
				0.483146	27.5159
				0.5	27.5159
				0.526882	27.5159
				0.526882	27.5159
				0.494737	27.5159
				0.515152	27.5159
				0.533981	27.5159
				0.504951	27.5159
				0.5	27.5159
				0.505155	27.5159
				0.494505	27.5159
				0.5	27.5159
				0.505376	27.5159
				0.5	27.5159
				0.505376	27.5159
				0.494505	27.5159
				0.494253	27.5159
				0.488889	27.5159
				0.520833	27.5159
				0.494505	27.5159
				0.505376	27.5159
				0.479167	27.5159
				0.489796	27.5159
				0.505155	27.5159
				0.535354	27.5159
				0.494737	27.5159
				0.5	27.5159
				0.5	27.5159
				0.505376	27.5159
				0.483871	27.5159
				0.511111	27.5159
				0.510638	27.5159
				0.511628	27.5159
				0.494505	27.5159
				0.544554	27.5159
				0.555556	27.5159
				0.515789	27.5159
				0.484536	27.5159
				0.474747	27.5159
				0.52	27.5159
				0.5	27.5159
				0.54	27.5159
				0.490196	27.5159
				0.515789	27.5159
				0.488889	27.5159
				0.488889	27.5159
				0.511111	27.5159
				0.511111	27.5159
				0.54902	27.5159
				0.52	27.5159
				0.54717	27.5159
				0.531915	27.5159
				0.55102	27.5159
				0.369565	27.5159
				0.515152	27.5159
				0.5	27.5159
				0.509804	27.5159
				0.474747	27.5159
				0.494737	27.5159
				0.5	27.5159
				0.5	27.5159
				0.494505	27.5159
				0.494505	27.5159
				0.494505	27.5159
				0.494505	27.5159
				0.505618	27.5159
				0.494505	27.5159
				0.520833	27.5159
				0.520833	27.5159
				0.536842	27.5159
				0.525773	27.5159
				0.536842	27.5159
				0.530612	27.5159
				0.5	27.5159
				0.48	27.5159
				0.5	27.5159
				0.515789	27.5159
				0.520833	27.5159
				0.515789	27.5159
				0.516484	27.5159
				0.478261	27.5159
				0.505618	27.5159
				0.5	27.5159
				0.5	27.5159
				0.5	27.5159
				0.535354	27.5159
				0.52	27.5159
				0.463918	27.5159
				0.473684	27.5159
				0.494737	27.5159
				0.5	27.5159
				0.52	27.5159
				0.505376	27.5159
				0.510638	27.5159
				0.505376	27.5159
				0.494737	27.5159
				0.5	27.5159
				0.494505	27.5159
				0.5	27.5159
				0.494505	27.5159
				0.510204	27.5159
				0.468085	27.5159
				0.5	27.5159
				0.510638	27.5159
				0.489362	27.5159
				0.505155	27.5159
				0.505376	27.5159
				0.505376	27.5159
				0.483146	27.5159
				0.515789	27.5159
				0.494949	27.5159
				0.489362	27.5159
				0.489362	27.5159
				0.489362	27.5159
				0.5	27.5159
				0.483146	27.5159
				0.483146	27.5159
				0.488372	27.5159
				0.479167	27.5159
				0.510204	27.5159
				0.494949	27.5159
				0.5	27.5159
				0.489362	27.5159
				0.5	27.5159
				0.536842	27.5159
				0.5	27.5159
				0.494505	27.5159
				0.505618	27.5159
				0.521739	27.5159
				0.488889	27.5159
				0.488889	27.5159
				0.488889	27.5159
				0.524752	27.5159
				0.505376	27.5159
				0.505376	27.5159
				0.494737	27.5159
				0.505376	27.5159
				0.505376	27.5159
				0.5	27.5159
				0.510638	27.5159
				0.494505	27.5159
				0.494505	27.5159
				0.483871	27.5159
				0.488889	27.5159
				0.516484	27.5159
				0.488889	27.5159
				0.5	27.5159
				0.521739	27.5159
				0.510638	27.5159
				0.483871	27.5159
				0.489796	27.5159
				0.510638	27.5159
				0.553398	27.5159
				0.5	27.5159
				0.505376	27.5159
				0.483871	27.5159
				0.505376	27.5159
				0.5	27.5159
				0.505376	27.5159
				0.505618	27.5159
				0.510638	27.5159
				0.510638	27.5159
				0.526882	27.5159
				0.5	27.5159
				0.463918	27.5159
				0.5	27.5159
				0.484536	27.5159
				0.483871	27.5159
				0.489362	27.5159
				0.510204	27.5159
				0.489362	27.5159
				0.494505	27.5159
				0.5	27.5159
				0.494737	27.5159
				0.515789	27.5159
				0.521739	27.5159
				0.485149	27.5159
				0.510204	27.5159
				0.52	27.5159
				0.505155	27.5159
				0.524752	27.5159
				0.5	27.5159
				0.489362	27.9348
				0.431818	27.9348
				0.460674	27.9348
				0.438202	27.9348
				0.489362	27.9348
				0.458824	27.9348
				0.483871	27.9348
				0.477273	27.9348
				0.488889	27.9348
				0.466667	27.9348
				0.510638	27.9348
				0.5	27.9348
				0.472527	27.9348
				0.489796	27.9348
				0.468085	27.9348
				0.478261	27.9348
				0.483871	27.9348
				0.488889	27.9348
				0.515789	27.9348
				0.483871	27.9348
				0.413043	27.9348
				0.489362	27.9348
				0.477273	27.9348
				0.466667	27.9348
				0.488889	27.9348
				0.477273	27.9348
				0.489362	27.9348
				0.510638	27.9348
				0.452632	27.9348
				0.52	27.9348
				0.478261	27.9348
				0.438202	27.9348
				0.460674	27.9348
				0.510638	27.9348
				0.478261	27.9348
				0.510638	27.9348
				0.478261	27.9348
				0.473684	27.9348
				0.494505	27.9348
				0.5	27.9348
				0.505376	27.9348
				0.425532	27.9348
				0.462366	27.9348
				0.446809	27.9348
				0.510204	27.9348
				0.494737	27.9348
				0.489362	27.9348
				0.419355	27.9348
				0.485149	27.9348
				0.458333	27.9348
				0.520833	27.9348
				0.494737	27.9348
				0.494737	27.9348
				0.479167	27.9348
				0.5	27.9348
				0.44086	27.9348
				0.472527	27.9348
				0.377778	27.9348
				0.473684	27.9348
				0.472527	27.9348
				0.483146	27.9348
				0.483871	27.9348
				0.526882	27.9348
				0.419355	27.9348
				0.422222	27.9348
				0.484536	27.9348
				0.5	27.9348
				0.444444	27.9348
				0.477273	27.9348
				0.483871	27.9348
				0.483871	27.9348
				0.489796	27.9348
				0.5	27.9348
				0.489362	27.9348
				0.5	27.9348
				0.478261	27.9348
				0.463918	27.9348
				0.494737	27.9348
				0.483871	27.9348
				0.483871	27.9348
				0.478261	27.9348
				0.471264	27.9348
				0.488889	27.9348
				0.466667	27.9348
				0.422222	27.9348
				0.478261	27.9348
				0.483146	27.9348
				0.5	27.9348
				0.5	27.9348
				0.410526	27.9348
				0.446809	27.9348
				0.456522	27.9348
				0.505376	27.9348
				0.483146	27.9348
				0.483146	27.9348
				0.391304	27.9348
				0.478261	27.9348
				0.510638	27.9348
				0.494505	27.9348
				0.494505	27.9348
				0.484536	27.9348
				0.483871	27.9348
				0.468085	27.9348
				0.483871	27.9348
				0.494737	27.9348
				0.478261	27.9348
				0.483871	27.9348
				0.494737	27.9348
				0.466667	27.9348
				0.488889	27.9348
				0.483871	27.9348
				0.494505	27.9348
				0.468085	27.9348
				0.483871	27.9348
				0.494505	27.9348
				0.511111	27.9348
				0.494505	27.9348
				0.494505	27.9348
				0.472527	27.9348
				0.494505	27.9348
				0.494505	27.9348
				0.488889	27.9348
				0.488889	27.9348
				0.494505	27.9348
				0.472527	27.9348
				0.488889	27.9348
				0.494505	27.9348
				0.488889	27.9348
				0.483871	27.9348
				0.472527	27.9348
				0.505155	27.9348
				0.505376	27.9348
				0.494505	27.9348
				0.526882	27.9348
				0.516484	27.9348
				0.494253	27.9348
				0.494253	27.9348
				0.5	27.9348
				0.5	27.9348
				0.516484	27.9348
				0.5	27.9348
				0.511111	27.9348
				0.516484	27.9348
				0.472527	27.9348
				0.488889	27.9348
				0.505376	27.9348
				0.510638	27.9348
				0.473684	27.9348
				0.5	27.9348
				0.510204	27.9348
				0.488889	27.9348
				0.5	27.9348
				0.483146	27.9348
				0.516484	27.9348
				0.5	27.9348
				0.511111	27.9348
				0.483146	27.9348
				0.505618	27.9348
				0.488889	27.9348
				0.505618	27.9348
				0.488889	27.9348
				0.5	27.9348
				0.488889	27.9348
				0.494505	27.9348
				0.511111	27.9348
				0.466667	27.9348
				0.494737	27.9348
				0.510638	27.9348
				0.52	27.9348
				0.535354	27.9348
				0.505376	27.9348
				0.472527	27.9348
				0.505376	27.9348
				0.477273	27.9348
				0.494505	27.9348
				0.488372	27.9348
				0.494505	27.9348
				0.5	27.9348
				0.521739	27.9348
				0.505618	27.9348
				0.5	27.9348
				0.5	27.9348
				0.494505	27.9348
				0.511111	27.9348
				0.505618	27.9348
				0.483146	27.9348
				0.505618	27.9348
				0.494505	27.9348
				0.516484	27.9348
				0.462366	27.9348
				0.494505	27.9348
				0.489796	27.9348
				0.504951	27.9348
				0.494737	27.9348
				0.5	27.9348
				0.5	27.9348
				0.488889	27.9348
				0.505376	27.9348
				0.505618	27.9348
				0.505376	27.9348
				0.5	27.9348
				0.488372	27.9348
				0.494505	27.9348
				0.473684	27.9348
				0.450549	27.9348
				0.511111	27.9348
				0.488889	27.9348
				0.521739	27.9348
				0.494505	27.9348
				0.44086	27.9348
				0.460674	27.9348
				0.446809	27.9348
				0.474747	27.9348
				0.465347	27.9348
				0.5	27.9348
				0.514563	27.9348
				0.509804	27.9348
				0.5	27.9348
				0.505376	27.9348
				0.516484	27.9348
				0.505618	27.9348
				0.516484	27.9348
				0.494505	27.9348
				0.488889	27.9348
				0.516484	27.9348
				0.488889	27.9348
				0.444444	27.9348
				0.462366	27.9348
				0.5	27.9348
				0.5	27.9348
				0.494505	27.9348
				0.510638	27.9348
				0.516484	27.9348
				0.511111	27.9348
				0.488889	27.9348
				0.505618	27.9348
				0.410526	27.9348
				0.456522	27.9348
				0.479167	27.9348
				0.48	27.9348
				0.505155	27.9348
				0.515152	27.9348
				0.535354	27.9348
				0.510204	27.9348
				0.489362	27.9348
				0.477273	27.9348
				0.488889	27.9348
				0.505618	27.9348
				0.521739	27.9348
				0.5	27.9348
				0.546392	27.9348
				0.526882	27.9348
				0.515789	27.9348
				0.384615	27.9348
				0.458333	27.9348
				0.5	27.9348
				0.529412	27.9348
				0.52	27.9348
				0.478261	27.9348
				0.489362	27.9348
				0.5	27.9348
				0.472527	27.9348
				0.478261	27.9348
				0.5	27.9348
				0.494253	27.9348
				0.510204	27.9348
				0.488889	27.9348
				0.5	27.9348
				0.391304	27.9348
				0.494949	27.9348
				0.495146	27.9348
				0.490196	27.9348
				0.515152	27.9348
				0.520833	27.9348
				0.5	27.9348
				0.494505	27.9348
				0.478261	27.9348
				0.5	27.9348
				0.5	27.9348
				0.505618	27.9348
				0.488889	27.9348
				0.5	27.9348
				0.478261	27.9348
				0.516484	27.9348
				0.494505	27.9348
				0.505618	27.9348
				0.516484	27.9348
				0.485149	27.9348
				0.494737	27.9348
				0.494505	27.9348
				0.505376	27.9348
				0.494505	27.9348
				0.5	27.9348
				0.511111	27.9348
				0.5	27.9348
				0.5	27.9348
				0.494505	27.9348
				0.494505	27.9348
				0.5	27.9348
				0.516484	27.9348
				0.515789	27.9348
				0.48	27.9348
				0.505376	27.9348
				0.5	27.9348
				0.494505	27.9348
				0.511111	27.9348
				0.478261	27.9348
				0.494505	27.9348
				0.511111	27.9348
				0.5	27.9348
				0.521739	27.9348
				0.510638	27.9348
				0.494505	27.9348
				0.483146	27.9348
				0.471264	27.9348
				0.511111	27.9348
				0.478261	27.9348
				0.521739	27.9348
				0.477273	27.9348
				0.535354	27.9348
				0.535354	27.9348
				-0.010526	27.9348
				0.490196	27.9348
				0.515789	27.9348
				0.510638	27.9348
				0.5	27.9348
				0.494505	27.9348
				0.5	27.9348
				0.505376	27.9348
				0.510638	27.9348
				0.5	27.9348
				0.5	27.9348
				0.511111	27.9348
				0.5	27.9348
				0.483146	27.9348
				0.471264	27.9348
				0.521739	27.9348
				0.488889	27.9348
				0.525773	27.9348
				0.520833	27.9348
				0.509804	27.9348
				0.479167	27.9348
				0.5	27.9348
				0.510638	27.9348
				0.483871	27.9348
				0.483871	27.9348
				0.494737	27.9348
				0.515789	27.9348
				0.488889	27.9348
				0.510638	27.9348
				0.505376	27.9348
				0.516484	27.9348
				0.510204	27.9348
				0.477273	27.9348
				0.494505	27.9348
				0.505618	27.9348
				0.511111	27.9348
				0.477273	27.9348
				0.505618	27.9348
				0.5	27.9348
				0.515789	27.9348
				0.510638	27.9348
				0.462366	27.9348
				0.489362	27.9348
				0.5	27.9348
				0.5	27.9348
				0.5	27.9348
				0.511111	27.9348
				0.483871	27.9348
				0.516484	27.9348
				0.478261	27.9348
				0.516484	27.9348
				0.505376	27.9348
				0.5	27.9348
				0.5	27.9348
				0.511111	27.9348
				0.477273	27.9348
				0.511111	27.9348
				0.5	27.9348
				0.488889	27.9348
				0.488889	27.9348
				0.505618	27.9348
				0.494253	27.9348
				0.472527	27.9348
				0.505376	27.9348
				0.472527	27.9348
				0.510638	27.9348
				0.510638	27.9348
				0.505376	27.9348
				0.466667	27.9348
				0.483871	27.9348
				0.483871	27.9348
				0.521739	27.9348
				0.483146	27.9348
				0.488889	27.9348
				0.477273	27.9348
				0.511111	27.9348
				0.494505	27.9348
				0.488889	27.9348
				0.5	27.9348
				0.478261	27.9348
				0.505376	27.9348
				0.510638	27.9348
				0.483871	27.9348
				0.488889	27.9348
				0.454545	27.9348
				0.494505	27.9348
				0.5	27.9348
				0.494505	27.9348
				0.494505	27.9348
				0.488889	27.9348
				0.5	27.9348
				0.494737	27.9348
				0.494737	27.9348
				0.505376	27.9348
				0.488889	27.9348
				0.494505	27.9348
				0.5	27.9348
				0.510638	27.9348
				0.494505	27.9348
				0.505376	27.9348
				0.505376	27.9348
				0.5	27.9348
				0.489362	27.9348
				0.5	27.9348
				0.485149	27.9348
				0.494949	27.9348
				0.4375	27.9348
				0.505155	27.9348
				0.37931	27.9348
				0.490566	27.9348
				0.460674	28.3523
				0.428571	28.3523
				0.47619	28.3523
				0.425287	28.3523
				0.472527	28.3523
				0.454545	28.3523
				0.386364	28.3523
				0.422222	28.3523
				0.460674	28.3523
				0.402299	28.3523
				0.494737	28.3523
				0.391304	28.3523
				0.355556	28.3523
				0.243902	28.3523
				0.428571	28.3523
				0.456522	28.3523
				0.456522	28.3523
				0.4375	28.3523
				0.452632	28.3523
				0.454545	28.3523
				0.428571	28.3523
				0.422222	28.3523
				0.218391	28.3523
				0.431579	28.3523
				0.4375	28.3523
				0.472527	28.3523
				0.483871	28.3523
				0.393258	28.3523
				0.452632	28.3523
				0.468085	28.3523
				0.406593	28.3523
				0.391304	28.3523
				0.44898	28.3523
				0.434783	28.3523
				0.462366	28.3523
				0.391304	28.3523
				0.458333	28.3523
				0.454545	28.3523
				0.410526	28.3523
				0.488889	28.3523
				0.5	28.3523
				0.489362	28.3523
				0.462366	28.3523
				0.511111	28.3523
				0.450549	28.3523
				0.489362	28.3523
				0.52	28.3523
				0.438202	28.3523
				0.472527	28.3523
				0.477273	28.3523
				0.489796	28.3523
				0.462366	28.3523
				0.525773	28.3523
				0.494505	28.3523
				0.460674	28.3523
				0.384615	28.3523
				0.466667	28.3523
				0.466667	28.3523
				0.460674	28.3523
				0.431579	28.3523
				0.5	28.3523
				0.5	28.3523
				0.462366	28.3523
				0.460674	28.3523
				0.452632	28.3523
				0.391304	28.3523
				0.397849	28.3523
				0.469388	28.3523
				0.485149	28.3523
				0.485149	28.3523
				0.5	28.3523
				0.494737	28.3523
				0.48	28.3523
				0.505376	28.3523
				0.245283	28.3523
				0.483146	28.3523
				0.471264	28.3523
				0.468085	28.3523
				0.373737	28.3523
				0.473684	28.3523
				-0.060606	28.3523
				0.416667	28.3523
				0.402299	28.7684
				0.387755	28.7684
				0.434783	28.7684
				0.397849	28.7684
				0.444444	28.7684
				0.428571	28.7684
				0.391304	28.7684
				0.406593	28.7684
				0.4	28.7684
				0.409091	28.7684
				0.483871	28.7684
				0.472527	28.7684
				0.444444	28.7684
				0.354167	28.7684
				0.452632	28.7684
				0.406593	28.7684
				0.431818	28.7684
				0.402299	28.7684
				0.375	28.7684
				0.483871	28.7684
				0.462366	28.7684
				0.347826	28.7684
				0.448276	28.7684
				0.479167	28.7684
				0.483146	28.7684
				0.443299	28.7684
				0.468085	28.7684
				0.5	28.7684
				0.276596	28.7684
				0.454545	28.7684
				0.391304	28.7684
				0.52	28.7684
				0.416667	28.7684
				0.5	28.7684
				0.419355	28.7684
				0.431818	28.7684
				0.454545	28.7684
				0.488889	28.7684
				0.36	28.7684
				0.177778	28.7684
				0.381443	28.7684
				0.443299	28.7684
				0.434783	28.7684
				0.42	28.7684
				0.480769	28.7684
				0.414141	28.7684
				0.363636	29.1833
				0.32	29.1833
				0.326316	29.1833
				0.224138	29.1833
				0.425532	29.1833
				0.44086	29.1833
				0.4375	29.1833
				0.308642	29.1833
				0.212598	29.1833
				0.282051	29.1833
				0.414141	29.1833
				0.389474	29.1833
				0.391304	29.1833
				0.397849	29.1833
				0.454545	29.1833
				0.444444	29.1833
				0.448276	29.1833
				0.425287	29.1833
				0.340659	29.1833
				0.4	29.1833
				0.478261	29.1833
				0.37931	29.1833
				0.288462	29.1833
				0.460674	29.1833
				0.406593	29.1833
				0.460674	29.1833
				0.479167	29.1833
				0.354167	29.1833
				0.452632	29.1833
				0.447619	29.1833
				0.4375	29.1833
				0.428571	29.1833
				-0.058824	29.1833
				0.354839	29.1833
				0.422222	29.1833
				0.395833	29.1833
				0.395833	29.1833
				0.452632	29.1833
				0.410526	29.1833
				0.402062	29.1833
				0.431818	29.5969
				0.326316	29.5969
				0.219048	29.5969
				0.431579	29.5969
				0.391304	29.5969
				0.413043	29.5969
				0.377778	29.5969
				0.333333	29.5969
				0.32	29.5969
				0.34	29.5969
				0.381443	29.5969
				0.381443	29.5969
				0.340659	29.5969
				0.263158	29.5969
				0.354167	29.5969
				0.362637	29.5969
				0.406593	29.5969
				0.384615	29.5969
				0.222222	29.5969
				0.463918	29.5969
				0.276596	29.5969
				0.307692	29.5969
				0.159091	29.5969
				0.422222	29.5969
				0.27907	29.5969
				0.346939	29.5969
				0.479167	29.5969
				0.258427	29.5969
				0.408163	29.5969
				0.485149	29.5969
				0.368421	29.5969
				0.175258	29.5969
				0.402062	29.5969
				-0.087719	29.5969
				0.402062	30.0091
				0.347826	30.0091
				0.285714	30.0091
				0.347826	30.0091
				0.289256	30.0091
				0.450549	30.0091
				0.311828	30.0091
				0.410526	30.0091
				0.306122	30.0091
				0.319149	30.0091
				0.326087	30.0091
				0.354839	30.0091
				0.208791	30.0091
				0.326316	30.0091
				0.264151	30.0091
				0.196429	30.0091
				0.367347	30.0091
				0.354167	30.0091
				0.147287	30.0091
				0.355556	30.0091
				0.252174	30.0091
				0.477273	30.0091
				0.366337	30.0091
				0.389474	30.0091
				0.359223	30.0091
				0.333333	30.0091
				0.333333	30.0091
				0.373737	30.0091
				0.384615	30.0091
				0.333333	30.0091
				0.42	30.0091
				0.319588	30.0091
				0.333333	30.0091
				0.261905	30.0091
				0.406593	30.0091
				0.397849	30.0091
				0.290323	30.0091
				0.36	30.0091
				0.318182	30.0091
				0.365385	30.0091
				0.397849	30.0091
				0.252336	30.4201
				0.221239	30.4201
				0.382979	30.4201
				0.272727	30.4201
				0.382979	30.4201
				0.294118	30.4201
				0.384615	30.4201
				0.384615	30.4201
				0.406593	30.4201
				0.393258	30.4201
				0.340206	30.4201
				0.474747	30.4201
				0.419355	30.4201
				0.369565	30.4201
				0.192308	30.4201
				0.288889	30.4201
				0.292929	30.4201
				0.23913	30.4201
				0.278351	30.4201
				0.3125	30.4201
				0.101449	30.4201
				0.326087	30.4201
				0.319149	30.4201
				0.272727	30.4201
				0.391304	30.4201
				0.32	30.4201
				0.354839	30.4201
				0.255319	30.4201
				0.408163	30.4201
				0.24	30.4201
				0.340206	30.4201
				0.34	30.4201
				0.269565	30.8298
				0.292035	30.8298
				0.319588	30.8298
				0.285714	30.8298
				0.206612	30.8298
				0.278351	30.8298
				0.186441	30.8298
				0.319588	30.8298
				0.319149	30.8298
				0.262136	30.8298
				0.319149	30.8298
				0.375	30.8298
				0.281553	30.8298
				0.26087	30.8298
				0.252747	30.8298
				0.28	30.8298
				0.25	30.8298
				0.284211	30.8298
				0.25	30.8298
				0.218391	30.8298
				0.222222	30.8298
				0.306931	30.8298
				0.26	30.8298
				0.225806	30.8298
				0.242718	30.8298
				0.25	30.8298
				0.272727	30.8298
				0.278351	30.8298
				0.172414	30.8298
				0.232	30.8298
				0.247312	30.8298
				0.25	30.8298
				0.347368	30.8298
				0.319588	30.8298
				0.326316	30.8298
				0.266667	30.8298
				0.375	30.8298
				0.247706	30.8298
				0.186441	31.2383
				0.313131	31.2383
				0.212121	31.2383
				0.242105	31.2383
				0.206349	31.2383
				0.306122	31.2383
				0.225806	31.2383
				0.354839	31.2383
				0.3125	31.2383
				0.184466	31.2383
				0.177778	31.2383
				0.352941	31.2383
				0.274725	31.2383
				0.257732	31.2383
				0.173077	31.2383
				0.333333	31.2383
				0.28	31.2383
				0.272727	31.2383
				0.285714	31.2383
				0.27619	31.2383
				0.22449	31.2383
				0.333333	31.2383
				0.268817	31.2383
				0.284211	31.2383
				0.182796	31.2383
				0.215686	31.2383
				0.263158	31.2383
				0.272727	31.2383
				0.298969	31.2383
				0.24	31.2383
				0.265306	31.2383
				0.292929	31.2383
				0.425743	31.2383
				0.290323	31.2383
				0.311828	31.2383
				0.149425	31.2383
				0.306122	31.6455
				0.207547	31.6455
				0.185841	31.6455
				0.326316	31.6455
				0.34	31.6455
				0.313131	31.6455
				0.270833	31.6455
				0.145631	31.6455
				0.112903	31.6455
				0.222222	31.6455
				0.286957	31.6455
				0.265306	31.6455
				0.191489	31.6455
				0.305263	31.6455
				0.254902	31.6455
				0.252174	31.6455
				0.290909	31.6455
				0.381443	31.6455
				0.227723	31.6455
				0.254902	31.6455
				0.305263	31.6455
				0.244898	31.6455
				0.216495	31.6455
				0.247525	31.6455
				0.259259	31.6455
				0.185841	31.6455
				0.24	31.6455
				0.292929	31.6455
				0.242105	31.6455
				0.290323	31.6455
				0.111111	31.6455
				0.185185	31.6455
				0.22449	31.6455
				0.3	32.0515
				0.267327	32.0515
				0.211009	32.0515
				0.223301	32.0515
				0.319588	32.0515
				0.254902	32.0515
				0.2	32.0515
				0.235294	32.0515
				0.434343	32.0515
				0.227723	32.0515
				0.352941	32.0515
				0.2	32.0515
				0.244898	32.0515
				0.254902	32.0515
				0.288462	32.0515
				0.225225	32.0515
				0.3	32.0515
				0.2	32.0515
				0.242718	32.0515
				0.22449	32.0515
				0.1875	32.0515
				0.25	32.0515
				0.270833	32.0515
				0.346535	32.0515
				0.122807	32.4562
				0.281553	32.4562
				0.272727	32.4562
				0.216495	32.4562
				0.214953	32.4562
				0.125926	32.4562
				0.178947	32.4562
				0.2	32.4562
				0.242718	32.4562
				0.173077	32.4562
				0.2	32.4562
				0.25	32.4562
				0.254902	32.4562
				0.212598	32.4562
				0.264151	32.4562
				0.27619	32.4562
				0.247525	32.4562
				0.262136	32.4562
				0.184466	32.4562
				0.274725	32.4562
				0.203883	32.4562
				0.157895	32.4562
				0.227723	32.8598
				0.19403	32.8598
				0.248	32.8598
				0.189655	32.8598
				0.130435	32.8598
				0.229358	32.8598
				0.172414	32.8598
				0.24	32.8598
				0.227723	32.8598
				0.211009	32.8598
				0.180952	32.8598
				0.232323	32.8598
				0.254902	32.8598
				0.173077	32.8598
				0.230769	32.8598
				0.25	32.8598
				0.26	32.8598
				0.232323	32.8598
				0.196078	32.8598
				0.171171	32.8598
				0.242105	33.2621
				0.2	33.2621
				0.25	33.2621
				0.080292	33.2621
				0.172932	33.2621
				0.089552	33.2621
				0.176471	33.2621
				0.230769	33.2621
				0.155963	33.2621
				0.152174	33.2621
				0.185185	33.2621
				0.159091	33.2621
				0.192308	33.2621
				0.219048	33.2621
				0.114754	33.2621
				0.20354	33.2621
				0.207921	33.2621
				0.235294	33.2621
				0.233645	33.2621
				0.16	33.2621
				0.203883	33.2621
				0.156863	33.2621
				0.227723	33.2621
				0.118644	33.2621
				0.153153	33.6633
				0.161905	33.6633
				0.25	33.6633
				0.240741	33.6633
				0.137931	33.6633
				0.12605	33.6633
				0.188679	33.6633
				0.171171	33.6633
				0.24	33.6633
				0.270833	33.6633
				0.037433	34.0633
				0.252336	34.0633
				0.238095	34.0633
				0.12963	34.0633
				0.226415	34.0633
				0.206897	34.0633
				0.211009	34.0633
				0.219048	34.0633
				0.192661	34.0633
				0.174312	34.0633
				0.128713	34.4621
				0.131148	34.4621
				0.203883	34.4621
				0.192661	34.4621
				0.188679	34.4621
				0.131148	34.4621
				0.181818	34.8598
				0.111111	34.8598
				0.140496	34.8598
				0.134615	35.2563
				0.154472	35.2563

## Sheet: LST_NDVI2022
		NDVI2022	LST2022
		0.416501	26.5551
		0.398903	26.1528
		0.391926	26.09
		0.374066	26.2276
		0.38298	26.2975
		0.401229	26.6729
		0.412231	26.3071
		0.354521	26.9707
		0.38696	26.5744
		0.376698	26.7475
		0.368037	26.9251
		0.360482	26.7931
		0.373427	27.0281
		0.363173	26.7019
		0.379468	26.7162
		0.387938	27.4251
		0.369387	26.1963
		0.387269	26.5431
		0.365301	27.9779
		0.408796	26.4901
		0.351388	26.7955
		0.310132	28.9936
		0.2889	25.4439
		0.383933	26.649
		0.234861	28.2395
		0.364666	26.8603
		0.402233	26.2613
		0.398632	26.4902
		0.332175	27.368
		0.374366	27.5135
		0.275887	29.0997
		0.279172	29.2009
		0.384899	27.3534
		0.308533	28.3176
		0.378976	27.1646
		0.375728	26.4324
		0.401912	26.2348
		0.397495	26.3119
		0.38475	26.1528
		0.327669	26.8197
		0.313948	25.519
		0.406641	26.2155
		0.340348	27.7282
		0.450704	26.3551
		0.420349	26.2757
		0.390161	26.4373
		0.38168	27.143
		0.403584	26.6681
		0.395778	26.4348
		0.061466	28.259
		0.257531	26.4545
		0.345473	25.7662
		0.421831	26.0537
		0.418474	26.2733
		0.335443	26.858
		0.184417	29.2083
		0.398162	26.3216
		0.399837	26.0393
		0.402915	25.9088
		0.389897	26.2999
		0.313743	27.0953
		0.201187	30.4002
		0.369924	27.8066
		0.360636	27.7257
		0.36711	27.4968
		0.272429	28.4006
		0.406359	26.8314
		0.43041	26.4226
		0.404193	26.5311
		0.366449	27.859
		0.394417	27.1956
		0.30182	28.7742
		0.427334	26.4805
		-0.097911	25.3086
		-0.058424	25.1528
		0.267026	25.9309
		0.392578	26.1769
		0.39548	26.2276
		0.394151	26.1552
		0.394544	26.02
		0.403465	26.1721
		0.423249	25.928
		0.394807	26.1697
		0.389451	26.1528
		0.393853	26.23
		0.396011	26.1431
		0.410508	25.9668
		0.376593	26.418
		0.401069	27.8588
		0.30789	27.5519
		0.335415	28.0564
		0.404568	27.4919
		0.332045	29.9491
		0.272595	28.8758
		0.437455	26.644
		0.399093	26.6993
		0.246394	27.8023
		0.289625	26.3894
		0.268369	26.2231
		0.301953	25.8195
		0.346545	26.0394
		-0.063436	25.1139
		0.404663	25.9184
		0.394858	25.9668
		0.391908	26.1069
		0.372904	26.0683
		0.379359	25.9862
		0.398137	26.1117
		0.382789	26.1456
		0.395855	25.9547
		0.407168	26.0248
		0.398927	25.7442
		0.392015	26.2493
		0.42899	26.0344
		0.392685	26.3096
		0.3871	26.3626
		0.417008	26.295
		0.180883	30.8654
		0.378709	29.0121
		0.33077	28.9887
		0.361383	28.431
		0.379027	28.1584
		0.322856	26.4904
		0.307363	25.8244
		0.311131	26.1603
		0.329152	26.1264
		0.327745	27.6376
		0.324566	27.2126
		0.380215	26.1408
		0.393568	26.0465
		0.389779	26.3553
		0.389655	26.4036
		0.379447	26.3723
		0.408557	26.2034
		0.381562	26.2493
		0.409131	26.2806
		0.395716	26.0465
		0.391879	25.9668
		0.412004	26.0513
		0.426474	26.1623
		0.430216	26.1454
		0.410362	26.3553
		0.419839	26.073
		0.363253	26.7043
		0.409728	26.1793
		0.304635	27.9852
		0.290398	28.6324
		0.320151	26.5939
		0.33024	27.0594
		0.335972	25.8437
		0.159404	26.409
		0.356963	29.384
		0.390445	26.471
		0.379796	26.5311
		0.3814	26.3072
		0.390493	26.4348
		0.397174	26.3722
		0.421549	26.4516
		0.390379	26.2493
		0.405747	26.3457
		0.393611	26.2469
		0.421451	26.1744
		0.404461	26.2517
		0.426665	25.9619
		0.43227	25.9788
		0.423822	25.9522
		0.413653	26.1696
		0.412855	26.0175
		0.41138	25.9063
		0.396879	26.0803
		0.415314	26.3312
		0.330296	27.2174
		0.415091	25.9643
		0.38959	28.2888
		0.310261	27.752
		0.315375	27.9448
		0.335504	30.5836
		0.377991	30.1989
		0.365463	29.2665
		0.342703	31.8015
		0.296714	32.1124
		0.400544	28.6297
		0.39825	26.7522
		0.403317	26.4011
		0.390126	26.3625
		0.408754	26.3191
		0.398267	26.2082
		0.413054	26.2106
		0.411377	26.3529
		0.413743	26.3721
		0.424193	26.1309
		0.434857	26.0802
		0.423392	26.1696
		0.435484	26.155
		0.416188	25.9716
		0.425861	25.7175
		-0.080026	25.4155
		0.420535	25.9474
		0.376994	26.9322
		0.369314	26.5432
		0.377405	26.4589
		0.35035	27.0018
		0.147112	27.6191
		0.40386	26.805
		0.396968	27.2578
		0.395032	27.4466
		0.395771	26.9873
		0.409421	27.2386
		0.322689	31.7786
		0.270043	32.4729
		0.412997	28.4356
		0.400355	26.3842
		0.362093	26.2831
		0.408085	26.2589
		0.434643	26.3094
		0.400541	26.2227
		0.418868	26.0537
		0.414338	26.1551
		0.407292	26.1021
		0.4107	26.1793
		0.422512	26.0682
		0.438169	26.0029
		0.42156	26.0295
		0.421521	26.044
		0.413969	25.7562
		0.365256	26.0901
		0.403451	25.9764
		0.428758	26.1382
		0.404432	25.9402
		0.400401	25.8072
		0.409888	26.0006
		-0.126871	25.3013
		0.371687	27.8042
		0.33068	30.7998
		0.304362	29.5979
		0.397823	27.0089
		0.313967	30.9786
		0.31402	31.7394
		0.405034	28.22
		0.400265	26.8074
		0.405999	26.4107
		0.418108	26.2612
		0.421714	26.2588
		0.408994	26.2348
		0.425935	26.2757
		0.419773	26.0923
		0.433174	26.348
		0.429174	26.1527
		0.411379	26.1913
		0.431445	25.9304
		0.421613	25.8288
		0.417648	26.307
		0.413036	26.1817
		0.410673	26.131
		0.397189	25.991
		0.383991	26.4349
		0.398597	25.7854
		0.408123	26.1648
		0.423043	26.0802
		0.132445	26.9425
		0.334433	29.9257
		0.394357	27.5706
		0.38026	27.0712
		0.399902	27.2124
		0.319089	32.9005
		0.39869	27.4561
		0.408963	27.0783
		0.406623	26.5551
		0.403518	26.5142
		0.411043	26.3432
		0.424581	26.3022
		0.429413	26.4203
		0.38971	26.1045
		0.408734	26.1865
		0.417152	26.2998
		0.426631	26.0971
		0.419021	26.0706
		0.39728	26.1962
		0.387813	26.1673
		0.416999	25.9304
		0.363608	25.2638
		0.362423	26.4782
		0.382585	25.9475
		0.406414	25.8386
		0.411356	26.0465
		0.413033	26.0827
		0.360838	27.909
		0.403397	27.2291
		0.38656	26.9154
		0.402303	26.8938
		0.252226	32.5829
		0.348923	28.3008
		0.414058	26.4973
		0.397128	26.6633
		0.422043	26.4973
		0.420581	26.4179
		0.408346	26.4203
		0.42372	26.0464
		0.374918	26.4975
		0.406061	26.3746
		0.377857	26.5456
		0.42041	26.2516
		0.401037	25.8289
		0.391843	26.2107
		0.38425	26.1914
		0.334229	25.3952
		0.425355	26.0416
		0.414876	26.0899
		0.401387	25.9233
		0.393987	26.0321
		0.404766	25.9015
		0.425135	26.0682
		0.225292	29.6826
		0.364377	27.0353
		0.369255	27.1431
		0.379545	27.0401
		0.374646	27.2842
		0.326633	28.2535
		0.34438	26.4229
		0.412573	26.7473
		0.400701	26.596
		0.408974	26.5551
		0.428225	26.5189
		-0.01938	25.6895
		0.158063	25.7497
		0.404697	26.3264
		0.420841	26.3287
		0.383314	26.312
		0.413895	26.131
		0.399873	26.4974
		0.39134	26.119
		0.396511	26.1576
		0.409223	26.2034
		0.406117	25.9982
		0.395575	26.09
		0.416952	25.9063
		0.215931	28.909
		0.411237	26.2444
		0.410288	26.3432
		0.354433	27.8804
		0.392848	27.48
		0.426547	27.1979
		0.092868	26.3561
		0.377991	27.076
		0.402843	26.7762
		0.388959	26.4228
		0.411423	26.4901
		0.422914	26.3866
		0.419658	26.4203
		0.422061	26.1672
		0.421032	26.0634
		0.40237	26.271
		0.382128	26.3024
		0.393726	26.2806
		0.414651	26.2757
		0.405927	26.0272
		0.415049	26.1165
		0.403387	26.0876
		0.425525	26.003
		0.406842	26.1479
		0.410184	26.7185
		0.410748	26.3191
		0.405206	26.131
		0.365119	27.1096
		0.25594	30.323
		0.34783	27.2221
		0.291793	31.5896
		0.245594	31.6036
		0.405685	26.7041
		0.399498	26.5888
		0.400941	26.5383
		0.420932	26.3842
		0.417474	26.5719
		0.40649	26.4853
		0.417433	26.3312
		0.396046	26.4902
		0.408582	26.1889
		0.409759	26.3023
		0.40224	26.4998
		0.291045	28.8049
		0.372666	26.7643
		0.395861	26.3312
		0.206118	28.876
		0.294087	27.6139
		0.296465	28.1349
		0.250236	28.4125
		0.424165	26.307
		0.224893	27.7071
		0.360897	28.4618
		0.38987	27.4275
		0.376041	27.5206
		0.19016	31.2502
		0.390005	26.745
		0.394363	26.4324
		0.395617	26.4854
		0.412549	26.4709
		0.389285	25.9886
		0.385289	26.5648
		0.415144	26.3721
		0.412493	26.4516
		0.32818	27.4635
		0.22331	29.187
		0.391602	26.8434
		0.387772	26.3144
		0.41682	26.4564
		0.417636	26.2564
		0.387261	26.4228
		0.407522	26.283
		0.384637	26.2469
		0.397138	26.0876
		0.39581	26.2179
		0.393103	26.3457
		0.108475	32.2418
		0.361864	27.6399
		0.37239	27.4084
		0.33257	28.8472
		0.406503	28.0561
		0.359838	28.1679
		0.351456	27.5613
		0.370309	27.155
		0.389481	26.5696
		0.406725	26.6657
		0.235351	28.147
		0.402187	26.4589
		0.414509	26.143
		0.403833	26.1141
		0.397363	26.3915
		0.406302	25.8797
		0.41008	25.6836
		0.415753	26.0272
		0.406675	25.9958
		0.419147	26.2347
		0.391236	26.0296
		0.390682	26.0803
		0.418852	26.2227
		0.396978	26.09
		0.350571	29.1842
		0.374034	27.947
		0.382201	27.4872
		0.285235	30.3556
		0.368881	27.0616
		0.32799	27.9258
		0.39353	26.6321
		0.39013	27.1214
		0.255798	30.1177
		0.129557	32.3518
		0.397241	26.4709
		0.418785	26.307
		0.416608	26.3239
		0.410477	26.3601
		0.404473	26.1648
		0.397489	26.1407
		0.417297	26.348
		0.423668	26.0996
		0.385565	26.1262
		0.395162	26.1166
		0.404696	25.9184
		0.397621	26.1214
		0.385927	26.0949
		0.404865	26.0779
		0.326813	30.8068
		0.103738	32.0395
		0.171135	31.3382
		0.375949	27.9731
		0.350931	27.3464
		0.397849	26.5238
		0.404557	26.4107
		0.422232	26.4323
		0.415505	26.7737
		0.389895	27.1143
		0.281689	29.3209
		0.399665	26.3481
		0.415967	26.3384
		0.423836	26.0658
		0.410352	25.8603
		0.398845	26.1672
		0.407424	26.0175
		0.396598	25.9571
		0.411336	26.1045
		0.399452	26.16
		0.409403	26.1576
		0.417735	26.0827
		0.41103	26.0948
		0.310552	28.8992
		0.343399	29.3324
		0.359476	29.1842
		0.30145	28.8214
		0.411785	26.7281
		0.40744	26.5311
		0.396066	26.6129
		0.412037	26.3938
		0.417187	26.283
		0.426052	26.5646
		0.390354	27.5897
		0.245244	29.3233
		0.398101	26.1335
		0.389478	26.0803
		0.395025	26.1745
		0.405435	26.2275
		0.409867	25.9619
		0.405846	26.0851
		0.422786	26.2082
		0.416121	26.0899
		0.41737	26.5118
		0.417955	26.102
		0.387456	25.9136
		0.388202	26.7114
		0.190077	27.8072
		0.381806	26.4228
		0.381041	26.4397
		0.391161	26.0755
		0.392597	25.9402
		0.362378	26.1625
		0.379675	26.2397
		0.383638	26.2782
		0.33902	27.0737
		0.282603	27.8759
		0.371917	26.0539
		0.289063	30.1876
		0.321187	27.5876
		0.33632	28.5661
		0.277981	29.3726
		0.414239	26.7882
		0.410332	26.6272
		0.395077	26.584
		0.435202	26.3528
		0.407509	26.2661
		0.421659	26.5214
		0.427968	26.3384
		0.365431	26.7763
		0.427586	26.98
		0.338813	27.2341
		0.381914	26.3361
		0.386039	26.2252
		0.406716	26.1793
		0.39881	25.9692
		0.397003	26.0489
		0.413462	26.3047
		0.408226	26.2324
		0.40432	26.0803
		0.399522	25.945
		0.400568	26.8218
		0.287679	27.664
		0.393307	26.4155
		0.417409	26.131
		0.391058	26.312
		0.407337	25.9692
		0.406323	26.2685
		0.407838	25.9184
		0.39491	25.904
		0.409296	25.6763
		0.400672	25.9813
		0.394477	25.8314
		0.393294	25.9426
		0.352236	27.5517
		0.277879	29.1797
		0.399728	25.9136
		0.251163	30.3417
		0.364791	26.9011
		0.370878	27.4586
		0.361403	27.5469
		0.317991	28.8072
		0.402092	26.4902
		0.417047	26.3119
		0.425701	26.4203
		0.418193	26.1648
		0.421943	26.2106
		0.416685	26.172
		0.411567	26.3264
		0.413658	26.1865
		0.417481	26.1648
		0.39035	26.6465
		0.403189	26.6585
		0.398824	27.1597
		0.271545	27.0285
		0.289542	27.5853
		0.406284	25.9547
		0.396038	25.9039
		0.408351	26.1576
		0.40916	26.061
		0.418767	26.377
		0.40854	26.2203
		0.397597	25.9305
		0.394508	25.7926
		0.397742	25.7926
		0.412323	25.9837
		0.398728	25.5624
		0.408057	25.841
		0.420952	25.7781
		0.428697	25.7635
		0.41574	25.7562
		0.414593	25.5624
		0.397337	26.0321
		0.399514	26.0635
		0.428396	25.6981
		0.424401	25.6545
		0.387513	25.8265
		0.37959	26.9058
		0.231007	28.2822
		0.250144	30.2927
		0.359601	28.5802
		0.423936	26.6055
		0.411588	26.4733
		0.421774	26.348
		0.399739	26.2589
		0.388741	26.1214
		0.415945	26.4227
		0.416347	26.213
		0.40346	26.1551
		0.412112	26.2034
		0.426533	26.1647
		0.392592	26.2059
		0.425894	26.1985
		0.415328	26.0755
		0.453814	26.2177
		0.409596	27.253
		0.277148	29.544
		0.311888	27.3083
		0.337992	27.5685
		0.383948	26.9298
		0.296007	27.7235
		0.215629	29.3399
		0.395802	25.9136
		0.394377	26.1624
		0.389255	25.9692
		0.402303	25.8773
		0.393727	25.7951
		0.384425	25.7128
		0.396154	25.8749
		0.402101	25.8773
		0.410258	25.6303
		0.422045	25.6206
		0.413951	25.6691
		0.397426	25.8241
		0.348642	26.2132
		0.319658	26.3291
		0.386886	25.8725
		0.372931	26.0901
		0.386527	26.0224
		0.418752	25.5187
		0.406753	25.8579
		0.3991	25.7345
		0.27263	28.6183
		0.373462	29.8577
		0.346489	26.8172
		0.424799	26.5334
		0.40944	26.5863
		0.388904	26.43
		0.412357	26.3071
		0.407841	26.0538
		0.404723	26.3336
		0.402296	26.3288
		0.413808	26.3408
		0.415461	26.2998
		0.444584	26.4587
		0.178766	34.6478
		0.381345	28.431
		0.432617	26.1695
		0.428719	25.9401
		0.438099	25.778
		0.397727	26.0755
		0.379526	26.0152
		0.402781	26.3023
		0.379838	25.7757
		0.40864	26.0006
		0.38713	26.0586
		0.397846	25.9305
		0.392323	25.904
		0.409629	25.7878
		0.388218	25.8532
		0.407982	25.6812
		0.379776	25.7491
		0.414502	25.8168
		0.40483	25.8168
		0.413365	25.543
		0.39303	25.7127
		0.397718	25.6376
		0.416595	25.5527
		0.395755	25.7418
		0.404506	25.6425
		0.417136	25.8555
		0.390016	25.7152
		0.407427	25.6497
		0.413151	25.703
		0.387469	28.9579
		0.414476	28.087
		0.406332	26.829
		0.412469	26.4227
		0.419254	26.3047
		0.392701	26.2348
		0.407954	26.1479
		0.41002	26.3384
		0.406486	26.1793
		0.427313	26.348
		0.448906	27.6729
		0.146393	35.6824
		0.408235	27.7517
		0.388004	28.8589
		0.408001	26.1841
		0.409479	26.0344
		0.408973	25.8483
		0.386915	25.8677
		0.401306	26.1093
		0.402986	26.0803
		0.406977	26.1093
		0.394218	26.2903
		0.411654	25.9547
		0.395748	25.9934
		0.39178	25.9523
		0.389834	25.8048
		0.388961	25.829
		0.396205	25.56
		0.385729	25.5237
		0.418308	25.7127
		0.419796	25.6182
		0.395874	25.8701
		0.409132	25.7054
		0.401155	25.6328
		0.422974	25.6448
		0.386008	25.6497
		0.396112	25.9789
		0.362394	26.4975
		0.373428	26.02
		0.37866	26.2276
		0.275673	28.6963
		0.357179	28.9368
		0.388736	28.8753
		0.322893	29.5274
		0.327023	31.534
		0.402532	26.3601
		0.402684	26.3673
		0.400468	26.1551
		0.43164	26.1334
		0.419249	26.2709
		0.430313	26.4636
		0.251049	33.5682
		0.268715	33.3385
		0.385868	28.7975
		0.355205	28.2747
		0.419324	26.003
		0.431949	25.9087
		0.40392	25.9015
		0.409323	25.9184
		0.407855	25.9643
		0.407977	25.887
		0.403802	25.8192
		0.398403	26.1672
		0.40109	26.1117
		0.407667	25.9015
		0.389021	25.8846
		0.406863	26.1093
		0.402099	25.8483
		0.410291	25.6351
		0.408588	25.7926
		0.408713	25.8144
		0.424906	25.7078
		0.379912	25.9378
		0.407735	25.8095
		0.422376	25.6836
		0.382014	25.7733
		0.379554	26.0562
		0.388068	26.0224
		0.416017	25.7926
		0.416532	25.6521
		0.417305	25.8119
		0.413235	25.6933
		0.420354	25.6472
		0.430324	27.6087
		0.375697	27.8185
		0.35774	29.1064
		0.347805	30.744
		0.395678	26.4781
		0.401578	26.4035
		0.406372	26.2251
		0.412858	26.0803
		0.430697	25.8651
		0.425668	25.9546
		0.362073	27.84
		0.427957	27.6373
		0.223249	33.0539
		0.413809	28.208
		0.407424	25.9982
		0.412279	26.1141
		0.425674	25.9909
		0.418198	25.9449
		0.405052	25.8894
		0.429104	25.9256
		0.402815	25.7442
		0.409739	26.061
		0.405748	25.9982
		0.404602	25.7732
		0.404333	25.8942
		0.41204	25.8337
		0.408305	25.6909
		0.414924	25.7442
		0.399606	26.003
		0.400394	25.6788
		0.404934	25.7781
		0.411759	25.8845
		0.388974	25.8725
		0.40924	25.9595
		0.403147	25.8507
		0.410312	25.7393
		0.418548	25.7781
		0.418296	25.7248
		0.400817	25.6109
		0.412666	25.7732
		0.42371	25.5114
		0.400216	25.8967
		0.408213	27.2554
		0.355025	27.5851
		0.055884	26.8155
		0.42631	28.9224
		0.399381	26.4059
		0.418964	26.4757
		0.414443	26.1648
		0.435158	25.9787
		0.446283	26.0898
		0.399385	27.2817
		0.439838	27.6635
		0.178175	35.0325
		0.249528	30.8001
		0.453882	25.7997
		0.446196	26.2708
		0.39698	32.2016
		0.440487	27.3963
		0.396931	27.1597
		0.434122	26.0392
		0.392534	26.1142
		0.405692	25.9764
		0.408282	26.0803
		0.400325	25.9934
		0.412651	25.87
		0.398717	25.8072
		0.391698	25.7781
		0.385562	25.991
		0.411495	25.7078
		0.408088	25.7829
		0.399871	25.8749
		0.39685	25.795
		0.395837	26.0369
		0.413004	25.5794
		0.419223	25.7998
		0.424961	25.7199
		0.414527	25.7175
		0.422257	25.7369
		0.385258	26.0296
		0.402007	26.1166
		0.393056	25.8338
		0.413377	25.6545
		0.284289	27.3132
		0.427543	27.4464
		0.298615	27.7092
		0.338512	27.8234
		0.473208	28.679
		0.437718	27.1883
		0.428347	26.4443
		0.418937	26.1141
		0.434295	26.1092
		0.441493	27.1883
		0.452918	26.9535
		0.409946	26.0199
		0.355645	26.3723
		0.448808	25.9642
		0.420813	25.8772
		0.43481	26.0971
		0.397575	29.1981
		0.424113	27.9848
		0.39463	28.0348
		-0.10579	25.4956
		0.148108	25.6116
		0.397383	26.1359
		0.416418	25.7974
		0.404382	26.0755
		0.394687	26.0635
		0.399517	25.9958
		0.394609	25.8386
		0.403464	25.7151
		0.403608	25.9208
		0.373384	25.9233
		0.403701	25.7757
		0.403934	25.6546
		0.384645	26.0828
		0.407407	25.6642
		0.399881	25.7442
		0.402363	25.8434
		0.417919	25.899
		0.431403	25.6956
		0.427883	25.5114
		0.420773	25.7272
		0.407725	25.8894
		0.411424	25.8676
		0.427473	25.715
		0.392117	26.8866
		0.394127	27.143
		0.382391	27.1909
		0.384781	29.7031
		0.385182	26.3915
		0.454907	26.237
		0.421551	27.2983
		0.466176	26.9487
		0.170974	33.6163
		0.439319	26.0246
		0.393652	26.0852
		0.445351	25.9401
		0.41646	26.0972
		0.446044	25.6569
		0.463764	25.6737
		0.435893	25.7949
		0.421326	26.0489
		0.405089	26.0561
		0.40892	25.7974
		0.396927	25.8652
		0.406453	26.0054
		0.398121	26.0127
		0.391803	25.8652
		0.390086	25.9934
		0.3843	26.1818
		0.400761	25.8338
		0.392379	25.9475
		0.395319	25.9765
		0.394105	25.9209
		0.395989	25.7926
		0.406233	25.8241
		0.409799	25.9498
		0.403718	25.6425
		0.396439	25.6497
		0.413233	25.7297
		0.390129	25.7588
		0.397347	25.9281
		0.423626	25.7465
		0.426474	25.7271
		0.440412	25.5453
		0.42523	25.8579
		0.41516	25.4605
		0.416976	25.9449
		0.406677	27.9064
		0.429809	28.3313
		0.223243	27.4447
		0.220226	27.1794
		0.422303	27.0183
		0.307815	31.1919
		0.423079	28.3787
		0.442134	25.928
		0.450764	26.0198
		0.436541	25.8312
		0.450897	25.7319
		0.401929	25.7224
		0.408904	25.8652
		0.413921	25.7006
		0.402347	25.9305
		0.404648	25.9813
		0.4031	25.8338
		0.39982	25.9619
		0.407047	25.9764
		0.396554	26.0924
		0.401844	26.1455
		0.394143	25.9257
		0.397615	25.858
		0.405018	26.032
		0.399817	25.8846
		0.410735	25.795
		0.406677	25.9498
		0.406006	25.945
		0.397833	25.9692
		0.41018	26.0972
		0.416306	25.7732
		0.400018	25.8096
		0.417294	25.87
		0.419189	25.9135
		0.424245	25.9401
		0.417297	25.8555
		0.410124	25.6763
		0.428349	25.6981
		0.423167	25.9836
		0.425874	25.8167
		0.349529	28.8566
		0.397754	28.9131
		0.231526	26.2425
		0.240814	25.9769
		0.464184	26.0512
		0.247162	31.4743
		0.438323	25.9787
		0.43287	25.8288
		0.420121	25.9401
		0.412866	25.8966
		0.414872	25.9063
		0.421543	25.9861
		0.402707	25.6933
		0.407305	25.8942
		0.402306	26.0344
		0.407923	26.0199
		0.406287	26.1117
		0.415341	25.9498
		0.406531	26.032
		0.407414	26.0489
		0.398988	25.8918
		0.413875	25.9015
		0.407623	26.0127
		0.407644	26.1334
		0.407009	26.1865
		0.407005	26.1938
		0.414617	26.1044
		0.408974	25.9692
		0.391981	26.1335
		0.38565	26.1094
		0.404543	26.0852
		0.394107	25.4241
		0.413012	25.8119
		0.410395	25.5915
		0.392191	25.8822
		0.411016	25.5284
		0.413254	25.64
		0.411193	25.7127
		0.423696	25.7611
		0.416319	25.5794
		-0.045647	27.6553
		0.253136	29.4925
		0.430736	25.957
		0.233624	29.2787
		0.307535	29.8743
		0.092488	26.5223
		0.429568	25.4847
		0.440464	25.9594
		0.394457	25.766
		0.393279	25.7685
		0.399726	25.9015
		0.429442	25.8385
		0.422934	25.974
		0.409453	25.8192
		0.425882	25.6981
		0.420067	25.8289
		0.406185	25.841
		0.411601	25.9813
		0.402027	25.7611
		0.409566	25.9015
		0.408544	26.1769
		0.407219	26.2758
		0.415027	26.1551
		0.418652	26.0006
		0.418283	26.295
		0.40475	26.1576
		0.404134	26.2613
		0.401419	25.9136
		0.413017	26.0102
		0.404199	26.189
		0.409097	26.2107
		0.338309	25.9331
		0.392505	26.0369
		0.414089	26.0078
		0.400819	25.8846
		0.419766	25.974
		0.414343	25.8144
		0.423408	25.928
		0.424745	25.6109
		0.407149	26.2517
		0.396821	26.1287
		0.272735	30.663
		0.421818	25.5648
		0.299438	26.7285
		0.290488	27.2223
		0.371356	26.3096
		0.303734	26.4833
		0.445614	25.9836
		0.289591	25.5846
		0.414924	25.6666
		0.394599	25.9934
		0.419375	26.0102
		0.412619	25.9232
		0.418626	25.8289
		0.422745	25.9135
		0.412907	25.7006
		0.429183	25.7514
		0.402662	25.9934
		0.407225	25.7466
		0.416759	25.8458
		0.414981	26.0102
		0.410542	25.8386
		0.405625	26.0876
		0.408969	26.0755
		0.398929	26.0465
		0.405359	25.812
		0.420659	26.0827
		0.405001	26.1166
		0.39112	25.962
		0.405904	26.0658
		0.39269	26.1914
		0.402752	26.1576
		0.399635	26.0465
		0.394364	25.945
		0.393039	25.8048
		0.402323	25.8822
		0.43926	25.8191
		0.425218	25.8506
		0.422754	25.7562
		0.385637	25.945
		0.393934	25.8943
		0.25255	31.5713
		0.215947	30.8119
		0.232899	27.2296
		0.424313	26.3914
		0.299089	26.0734
		0.306757	26.3869
		0.436835	25.7077
		0.401209	25.766
		0.46402	26.8888
		0.315609	25.4195
		0.443607	25.7029
		0.406585	25.8265
		0.403416	26.0224
		0.40394	25.9498
		0.411901	25.8603
		0.412891	25.9474
		0.410404	26.1407
		0.39718	25.8168
		0.39727	25.9499
		0.397238	26.0006
		0.402241	25.795
		0.399244	25.6982
		0.403697	25.9547
		0.396278	26.0562
		0.397315	25.9837
		0.399454	25.7321
		0.410492	26.061
		0.4064	26.3216
		0.411112	25.9813
		0.409864	25.7224
		0.402218	26.0103
		0.395649	26.0345
		0.406197	26.0634
		0.408311	26.2492
		0.399837	26.0538
		0.396065	26.0465
		0.389323	25.7733
		0.386982	26.0586
		0.401553	25.9112
		0.402102	25.6521
		0.379139	26.1601
		0.373696	26.4638
		-0.100358	26.7438
		0.359384	30.143
		0.473733	25.7537
		0.417001	26.2372
		0.063115	26.2333
		0.433154	25.9667
		0.338078	26.1288
		0.374926	25.8847
		0.411079	26.0465
		-0.041508	25.675
		-0.037804	25.2987
		-0.051515	25.3571
		0.339311	28.9581
		0.413196	27.0495
		0.429517	25.7441
		0.392598	25.9982
		0.413002	25.9111
		0.413072	25.9958
		0.391704	25.7539
		0.408694	25.7054
		0.397003	25.8967
		0.414211	25.8966
		0.409301	25.6085
		0.393083	25.9185
		0.403812	26.0707
		0.394661	25.7854
		0.408733	25.7563
		0.421034	26.0537
		0.404624	26.1986
		0.403871	26.2613
		0.411272	25.7539
		0.40935	25.8192
		0.397373	26.1624
		0.402423	26.0635
		0.401175	26.1503
		0.401313	25.8676
		0.390802	25.7999
		0.382274	25.8048
		0.419682	25.7998
		0.392065	25.9837
		0.381332	26.0176
		0.364882	26.7139
		0.383703	28.5091
		0.362805	25.5286
		0.356531	26.5817
		0.311779	26.942
		0.321872	26.1458
		0.228185	26.8055
		0.366094	26.7259
		0.410138	26.3866
		0.129197	26.3223
		-0.041372	24.9921
		-0.009521	25.3279
		-0.033871	25.2428
		0.297721	30.0731
		0.363442	28.156
		0.184329	26.1992
		0.412575	25.841
		0.41135	25.8676
		0.401239	25.9474
		0.401699	25.7418
		0.409107	25.8144
		0.404591	25.8047
		0.404317	25.5867
		0.420629	25.7199
		0.388267	25.9016
		0.413951	25.8119
		0.416835	25.6303
		0.393627	25.9571
		0.397684	25.8918
		0.399729	26.0997
		0.400145	25.9233
		0.406586	26.0972
		0.393233	25.9015
		0.404271	25.9063
		0.387214	26.1069
		0.408682	26.0199
		0.413013	25.7998
		0.407471	25.7757
		0.422613	25.6569
		0.403975	25.5479
		0.401306	25.7539
		0.376599	26.4373
		0.248048	28.6893
		0.446425	25.635
		0.339104	27.2365
		0.467711	27.0206
		0.387726	25.7854
		0.141851	26.2861
		0.314384	25.9622
		0.445775	26.1116
		0.322	29.3089
		0.227278	26.076
		0.07862	25.1137
		-0.032875	24.9969
		0.123765	25.8491
		0.331486	29.8414
		0.420546	27.3079
		0.403899	25.8217
		0.439393	25.7077
		0.3946	25.7103
		0.41092	25.7756
		0.405097	25.7708
		0.404762	25.7757
		0.396621	25.8096
		0.405587	25.8918
		0.417143	25.7539
		0.392915	25.7951
		0.41069	25.7781
		0.397732	25.6812
		0.406461	25.6254
		0.413842	25.8555
		0.40208	25.858
		0.406691	25.8652
		0.399856	25.9402
		0.390794	25.8773
		0.389849	25.8265
		0.392976	25.6376
		0.388199	25.6861
		0.392234	25.7466
		0.413019	25.766
		0.411974	25.4168
		0.411597	25.339
		0.381082	25.8774
		0.386789	26.7642
		0.262799	31.0391
		0.354719	28.5731
		0.449227	25.4336
		0.416374	26.1479
		0.422663	25.7562
		0.251566	28.448
		0.304833	28.2986
		0.387525	25.9064
		0.421301	27.0232
		0.326811	25.9815
		0.393958	25.6109
		0.302154	26.1989
		0.471871	26.6126
		0.23105	33.1085
		0.417544	26.2781
		0.402761	26.061
		0.389189	25.7709
		0.389076	25.9185
		0.393122	25.7612
		0.407171	25.6739
		0.414503	25.5721
		0.395635	25.703
		0.407207	25.5479
		0.401583	25.9934
		0.404782	25.9643
		0.410705	25.9692
		0.399146	25.7393
		0.397531	26.02
		0.402764	25.6328
		0.402719	25.8314
		0.398225	25.8967
		0.399193	25.5794
		0.344892	30.4905
		0.312076	30.0053
		0.317653	28.4478
		0.44735	25.698
		0.320665	28.5211
		0.420827	25.9039
		0.328509	26.2736
		0.344135	26.1553
		0.387873	25.6788
		0.425711	25.4216
		0.424662	25.7659
		0.378793	26.1263
		0.411877	26.8458
		0.350074	25.6717
		0.268301	27.3634
		0.331761	30.1337
		0.351487	29.4005
		0.28944	30.6768
		0.423475	26.4612
		0.417072	25.686
		0.333698	26.5265
		0.296283	25.8825
		0.303663	26.3195
		0.326518	25.8582
		0.232034	26.5244
		0.298176	26.0975
		0.422249	25.6957
		0.42488	25.7489
		0.354337	25.7976
		0.423869	25.6787
		0.36712	26.4084
		0.25986	25.9261
		0.210457	32.6448
		0.31685	27.9115
		0.434261	26.3335
		0.384139	25.6134
		0.285825	28.4195
		0.353574	27.3751
		0.43473	25.8046
		0.245951	26.2955
		0.46339	25.836
		0.33752	26.0926
		0.378099	26.5071
		0.337382	27.1288
		0.283192	27.9211
		0.419932	25.6399
		0.303074	25.7856
		0.163982	26.8945
		0.421778	26.6296
		0.355846	26.2229
		0.320263	29.3207
		0.259451	25.6744
		0.346544	25.788
		0.401015	25.8507
		0.336526	28.0469
		0.357677	26.8147
		0.332433	28.1657
		0.374697	26.0804
		0.462435	25.6786
		0.376468	27.6017
		0.396741	25.5988
		0.3696	26.3024
		0.373004	27.0664
		0.393512	27.4155
		0.244845	31.5182
		0.412311	26.6584
		0.392918	25.6473
		0.446093	25.9787
		0.335023	26.4302
		0.38913	26.4107
		0.232885	26.7455
		0.318707	25.8292
		0.452174	25.7537
		0.353885	27.1
		0.430232	25.3365
		0.289538	25.7736
		0.434079	25.5672
		0.41115	26.4107
		0.379669	26.7018
		0.417792	26.5551
		0.338157	26.5986
		0.308323	26.3339
		0.406255	26.2034
		0.308537	25.6282
		0.375034	25.8435
		0.260116	26.4159
		0.404586	26.5166
		0.431557	26.2491
		0.296685	26.9397
		0.372467	26.7619
		0.457719	25.807
		0.374355	26.2156
		0.42209	25.7127
		0.417908	26.2492
		0.354552	25.4583
		0.435539	25.9594
		0.296647	26.0348
		0.307848	30.1175
		0.432379	25.5284
		0.330903	27.6448
		0.388398	26.2517
		0.343196	27.0881
		0.328407	25.9017
		0.342543	25.5844
		0.389562	26.0586
		0.448206	26.3455
		0.377663	26.1842
		0.318891	28.5496
		0.376614	27.4418
		0.403694	26.1551
		0.409553	27.4417
		0.300982	30.1759
		0.411944	25.3633
		0.408817	26.003
		0.324858	26.0443
		0.306461	29.6682
		0.277316	28.0542
		0.303637	30.5721
		0.295309	26.1555
		0.428008	28.7288
		0.352178	28.9675
		0.304067	30.5512
		0.297926	31.1201
		0.259232	26.2401
		0.294102	27.2438
		0.294133	28.1325
		0.282166	29.2386
		0.355551	28.45
		0.33154	27.5375
		0.298491	30.9276
		0.405954	28.125
		0.337732	28.3625
		0.337026	26.2109
		0.46441	26.343
		0.39972	26.1769
		0.349722	29.0665
		0.329998	29.9818
		0.349648	27.2771
		0.410799	26.9729
		0.436655	25.8094
		0.196169	29.6967
		0.126597	28.9611
		0.260505	30.9464
		0.354644	29.9584
		0.29221	30.995
		0.259404	30.0429
		0.346485	29.4569
		0.167673	33.2547
		0.351156	28.1086
		0.37323	27.2244
		0.43637	26.9008
		0.01051	27.2349
		0.297392	27.6997

## Sheet: ECI_NDVI1988
		ECI1988	LST1988			ECI1988	NDVI1988
		0.046092	22.8157			0.046092	0.625
		0.072019	22.8157			0.072019	0.2
		0.091595	23.2503			0.091595	0.630435
		0.092567	23.2503			0.092567	0.617977
		0.094374	23.2503			0.094374	0.595506
		0.097514	23.2503			0.097514	0.558442
		0.127167	23.6834			0.127167	0.723577
		0.128423	23.2503			0.128423	0.290323
		0.131502	23.6834			0.131502	0.681416
		0.132774	23.6834			0.132774	0.669565
		0.133411	23.6834			0.133411	0.663717
		0.134077	23.6834			0.134077	0.657658
		0.135396	23.6834			0.135396	0.645833
		0.136098	23.6834			0.136098	0.63964
		0.136696	23.6834			0.136696	0.634409
		0.137154	23.6834			0.137154	0.630435
		0.137592	23.6834			0.137592	0.626667
		0.137626	23.6834			0.137626	0.626374
		0.137958	23.6834			0.137958	0.623529
		0.138111	23.6834			0.138111	0.622222
		0.138111	23.6834			0.138111	0.622222
		0.138248	23.6834			0.138248	0.621053
		0.138484	23.6834			0.138484	0.619048
		0.138484	23.6834			0.138484	0.619048
		0.13861	23.6834			0.13861	0.617977
		0.138825	23.6834			0.138825	0.616162
		0.138917	23.6834			0.138917	0.615385
		0.139125	23.6834			0.139125	0.613636
		0.139125	23.6834			0.139125	0.613636
		0.139588	23.6834			0.139588	0.609756
		0.139655	23.6834			0.139655	0.609195
		0.139655	23.6834			0.139655	0.609195
		0.139655	23.6834			0.139655	0.609195
		0.139655	23.6834			0.139655	0.609195
		0.139715	23.6834			0.139715	0.608696
		0.140168	23.6834			0.140168	0.604938
		0.140168	23.6834			0.140168	0.604938
		0.140168	23.6834			0.140168	0.604938
		0.140168	23.6834			0.140168	0.604938
		0.140202	23.6834			0.140202	0.604651
		0.140202	23.6834			0.140202	0.604651
		0.140202	23.6834			0.140202	0.604651
		0.140202	23.6834			0.140202	0.604651
		0.140233	23.6834			0.140233	0.604396
		0.140767	23.6834			0.140767	0.6
		0.140767	23.6834			0.140767	0.6
		0.140767	23.6834			0.140767	0.6
		0.140767	23.6834			0.140767	0.6
		0.140767	23.6834			0.140767	0.6
		0.140767	23.6834			0.140767	0.6
		0.140767	23.6834			0.140767	0.6
		0.140767	23.6834			0.140767	0.6
		0.140767	23.6834			0.140767	0.6
		0.140767	23.6834			0.140767	0.6
		0.140767	23.6834			0.140767	0.6
		0.140767	23.6834			0.140767	0.6
		0.140767	23.6834			0.140767	0.6
		0.140767	23.6834			0.140767	0.6
		0.141177	23.6834			0.141177	0.596639
		0.141287	23.6834			0.141287	0.595745
		0.141316	23.6834			0.141316	0.595506
		0.141316	23.6834			0.141316	0.595506
		0.141349	23.6834			0.141349	0.595238
		0.141349	23.6834			0.141349	0.595238
		0.141349	23.6834			0.141349	0.595238
		0.141349	23.6834			0.141349	0.595238
		0.141349	23.6834			0.141349	0.595238
		0.141349	23.6834			0.141349	0.595238
		0.141349	23.6834			0.141349	0.595238
		0.141349	23.6834			0.141349	0.595238
		0.141349	23.6834			0.141349	0.595238
		0.141883	23.6834			0.141883	0.590909
		0.141883	23.6834			0.141883	0.590909
		0.141951	23.6834			0.141951	0.590361
		0.141951	23.6834			0.141951	0.590361
		0.141951	23.6834			0.141951	0.590361
		0.141951	23.6834			0.141951	0.590361
		0.142027	23.6834			0.142027	0.589744
		0.142467	23.6834			0.142467	0.586207
		0.142467	23.6834			0.142467	0.586207
		0.142572	23.6834			0.142572	0.585366
		0.142572	23.6834			0.142572	0.585366
		0.142572	23.6834			0.142572	0.585366
		0.142572	23.6834			0.142572	0.585366
		0.142572	23.6834			0.142572	0.585366
		0.142572	23.6834			0.142572	0.585366
		0.142572	23.6834			0.142572	0.585366
		0.142691	23.6834			0.142691	0.584416
		0.142691	23.6834			0.142691	0.584416
		0.142691	23.6834			0.142691	0.584416
		0.14307	23.6834			0.14307	0.581395
		0.14307	23.6834			0.14307	0.581395
		0.14307	23.6834			0.14307	0.581395
		0.14307	23.6834			0.14307	0.581395
		0.14307	23.6834			0.14307	0.581395
		0.143215	23.6834			0.143215	0.580247
		0.143215	23.6834			0.143215	0.580247
		0.143215	23.6834			0.143215	0.580247
		0.143215	23.6834			0.143215	0.580247
		0.143215	23.6834			0.143215	0.580247
		0.143215	23.6834			0.143215	0.580247
		0.143215	23.6834			0.143215	0.580247
		0.143215	23.6834			0.143215	0.580247
		0.143379	23.6834			0.143379	0.578947
		0.143693	23.6834			0.143693	0.576471
		0.143693	23.6834			0.143693	0.576471
		0.143693	23.6834			0.143693	0.576471
		0.143693	23.6834			0.143693	0.576471
		0.143693	23.6834			0.143693	0.576471
		0.14388	23.6834			0.14388	0.575
		0.14388	23.6834			0.14388	0.575
		0.14388	23.6834			0.14388	0.575
		0.14388	23.6834			0.14388	0.575
		0.14388	23.6834			0.14388	0.575
		0.144335	23.6834			0.144335	0.571429
		0.144335	23.6834			0.144335	0.571429
		0.144335	23.6834			0.144335	0.571429
		0.144567	23.6834			0.144567	0.56962
		0.144567	23.6834			0.144567	0.56962
		0.144567	23.6834			0.144567	0.56962
		0.144567	23.6834			0.144567	0.56962
		0.144567	23.6834			0.144567	0.56962
		0.144567	23.6834			0.144567	0.56962
		0.144567	23.6834			0.144567	0.56962
		0.144567	23.6834			0.144567	0.56962
		0.145	23.6834			0.145	0.566265
		0.145	23.6834			0.145	0.566265
		0.14528	23.6834			0.14528	0.564103
		0.14528	23.6834			0.14528	0.564103
		0.14528	23.6834			0.14528	0.564103
		0.14528	23.6834			0.14528	0.564103
		0.14528	23.6834			0.14528	0.564103
		0.14528	23.6834			0.14528	0.564103
		0.14528	23.6834			0.14528	0.564103
		0.145687	23.6834			0.145687	0.560976
		0.145687	23.6834			0.145687	0.560976
		0.145687	23.6834			0.145687	0.560976
		0.145687	23.6834			0.145687	0.560976
		0.146018	23.6834			0.146018	0.558442
		0.146018	23.6834			0.146018	0.558442
		0.146018	23.6834			0.146018	0.558442
		0.146018	23.6834			0.146018	0.558442
		0.146018	23.6834			0.146018	0.558442
		0.146018	23.6834			0.146018	0.558442
		0.146018	23.6834			0.146018	0.558442
		0.146784	23.6834			0.146784	0.552632
		0.146784	23.6834			0.146784	0.552632
		0.147133	23.6834			0.147133	0.55
		0.148685	23.6834			0.148685	0.538462
		0.148905	23.6834			0.148905	0.536842
		0.149173	23.6834			0.149173	0.534884
		0.149504	23.6834			0.149504	0.532468
		0.150537	23.6834			0.150537	0.525
		0.154843	23.6834			0.154843	0.494949
		0.163686	23.6834			0.163686	0.438202
		0.167172	23.6834			0.167172	0.417476
		0.180426	24.115			0.180426	0.644444
		0.181028	24.115			0.181028	0.640449
		0.181649	24.115			0.181649	0.636364
		0.181947	24.115			0.181947	0.634409
		0.182288	24.115			0.182288	0.632184
		0.182288	24.115			0.182288	0.632184
		0.182557	24.115			0.182557	0.630435
		0.182947	24.115			0.182947	0.627907
		0.183626	24.115			0.183626	0.623529
		0.18383	24.115			0.18383	0.622222
		0.184013	24.115			0.184013	0.621053
		0.184327	24.115			0.184327	0.619048
		0.184327	24.115			0.184327	0.619048
		0.184327	24.115			0.184327	0.619048
		0.184327	24.115			0.184327	0.619048
		0.184495	24.115			0.184495	0.617977
		0.184495	24.115			0.184495	0.617977
		0.184495	24.115			0.184495	0.617977
		0.184495	24.115			0.184495	0.617977
		0.184903	24.115			0.184903	0.615385
		0.18505	24.115			0.18505	0.614458
		0.18518	24.115			0.18518	0.613636
		0.18518	24.115			0.18518	0.613636
		0.18518	24.115			0.18518	0.613636
		0.18518	24.115			0.18518	0.613636
		0.18518	24.115			0.18518	0.613636
		0.18518	24.115			0.18518	0.613636
		0.18518	24.115			0.18518	0.613636
		0.18518	24.115			0.18518	0.613636
		0.185296	24.115			0.185296	0.612903
		0.185796	24.115			0.185796	0.609756
		0.185796	24.115			0.185796	0.609756
		0.185886	24.115			0.185886	0.609195
		0.185886	24.115			0.185886	0.609195
		0.185886	24.115			0.185886	0.609195
		0.185886	24.115			0.185886	0.609195
		0.185886	24.115			0.185886	0.609195
		0.185886	24.115			0.185886	0.609195
		0.186568	24.115			0.186568	0.604938
		0.186614	24.115			0.186614	0.604651
		0.186614	24.115			0.186614	0.604651
		0.186614	24.115			0.186614	0.604651
		0.186614	24.115			0.186614	0.604651
		0.186614	24.115			0.186614	0.604651
		0.186614	24.115			0.186614	0.604651
		0.186614	24.115			0.186614	0.604651
		0.186614	24.115			0.186614	0.604651
		0.186614	24.115			0.186614	0.604651
		0.186614	24.115			0.186614	0.604651
		0.186614	24.115			0.186614	0.604651
		0.186614	24.115			0.186614	0.604651
		0.186614	24.115			0.186614	0.604651
		0.186614	24.115			0.186614	0.604651
		0.186614	24.115			0.186614	0.604651
		0.186614	24.115			0.186614	0.604651
		0.186655	24.115			0.186655	0.604396
		0.186655	24.115			0.186655	0.604396
		0.187365	24.115			0.187365	0.6
		0.187365	24.115			0.187365	0.6
		0.187365	24.115			0.187365	0.6
		0.187365	24.115			0.187365	0.6
		0.187365	24.115			0.187365	0.6
		0.187365	24.115			0.187365	0.6
		0.187365	24.115			0.187365	0.6
		0.187365	24.115			0.187365	0.6
		0.188097	24.115			0.188097	0.595506
		0.188097	24.115			0.188097	0.595506
		0.188097	24.115			0.188097	0.595506
		0.188097	24.115			0.188097	0.595506
		0.188097	24.115			0.188097	0.595506
		0.188097	24.115			0.188097	0.595506
		0.188097	24.115			0.188097	0.595506
		0.18814	24.115			0.18814	0.595238
		0.18814	24.115			0.18814	0.595238
		0.18814	24.115			0.18814	0.595238
		0.18814	24.115			0.18814	0.595238
		0.18814	24.115			0.18814	0.595238
		0.18814	24.115			0.18814	0.595238
		0.18814	24.115			0.18814	0.595238
		0.18814	24.115			0.18814	0.595238
		0.18814	24.115			0.18814	0.595238
		0.18819	24.115			0.18819	0.594937
		0.18819	24.115			0.18819	0.594937
		0.18819	24.115			0.18819	0.594937
		0.18819	24.115			0.18819	0.594937
		0.188851	24.115			0.188851	0.590909
		0.188851	24.115			0.188851	0.590909
		0.188851	24.115			0.188851	0.590909
		0.188851	24.115			0.188851	0.590909
		0.188851	24.115			0.188851	0.590909
		0.188851	24.115			0.188851	0.590909
		0.188851	24.115			0.188851	0.590909
		0.188851	24.115			0.188851	0.590909
		0.188851	24.115			0.188851	0.590909
		0.188941	24.115			0.188941	0.590361
		0.188941	24.115			0.188941	0.590361
		0.188941	24.115			0.188941	0.590361
		0.188941	24.115			0.188941	0.590361
		0.188941	24.115			0.188941	0.590361
		0.188941	24.115			0.188941	0.590361
		0.188941	24.115			0.188941	0.590361
		0.188941	24.115			0.188941	0.590361
		0.188941	24.115			0.188941	0.590361
		0.188941	24.115			0.188941	0.590361
		0.188941	24.115			0.188941	0.590361
		0.188941	24.115			0.188941	0.590361
		0.188941	24.115			0.188941	0.590361
		0.188941	24.115			0.188941	0.590361
		0.188941	24.115			0.188941	0.590361
		0.188941	24.115			0.188941	0.590361
		0.189043	24.115			0.189043	0.589744
		0.189043	24.115			0.189043	0.589744
		0.189043	24.115			0.189043	0.589744
		0.189628	24.115			0.189628	0.586207
		0.189628	24.115			0.189628	0.586207
		0.189628	24.115			0.189628	0.586207
		0.189628	24.115			0.189628	0.586207
		0.189628	24.115			0.189628	0.586207
		0.189628	24.115			0.189628	0.586207
		0.189628	24.115			0.189628	0.586207
		0.189768	24.115			0.189768	0.585366
		0.189768	24.115			0.189768	0.585366
		0.189768	24.115			0.189768	0.585366
		0.189768	24.115			0.189768	0.585366
		0.189768	24.115			0.189768	0.585366
		0.189768	24.115			0.189768	0.585366
		0.189768	24.115			0.189768	0.585366
		0.189768	24.115			0.189768	0.585366
		0.189768	24.115			0.189768	0.585366
		0.189926	24.115			0.189926	0.584416
		0.189926	24.115			0.189926	0.584416
		0.189926	24.115			0.189926	0.584416
		0.190431	24.115			0.190431	0.581395
		0.190431	24.115			0.190431	0.581395
		0.190431	24.115			0.190431	0.581395
		0.190431	24.115			0.190431	0.581395
		0.190431	24.115			0.190431	0.581395
		0.190431	24.115			0.190431	0.581395
		0.190431	24.115			0.190431	0.581395
		0.190431	24.115			0.190431	0.581395
		0.190431	24.115			0.190431	0.581395
		0.190431	24.115			0.190431	0.581395
		0.190431	24.115			0.190431	0.581395
		0.190624	24.115			0.190624	0.580247
		0.190624	24.115			0.190624	0.580247
		0.190624	24.115			0.190624	0.580247
		0.190624	24.115			0.190624	0.580247
		0.190624	24.115			0.190624	0.580247
		0.190624	24.115			0.190624	0.580247
		0.190624	24.115			0.190624	0.580247
		0.190624	24.115			0.190624	0.580247
		0.190624	24.115			0.190624	0.580247
		0.190624	24.115			0.190624	0.580247
		0.190624	24.115			0.190624	0.580247
		0.190624	24.115			0.190624	0.580247
		0.190624	24.115			0.190624	0.580247
		0.190624	24.115			0.190624	0.580247
		0.190624	24.115			0.190624	0.580247
		0.190624	24.115			0.190624	0.580247
		0.191259	24.115			0.191259	0.576471
		0.191259	24.115			0.191259	0.576471
		0.191259	24.115			0.191259	0.576471
		0.191259	24.115			0.191259	0.576471
		0.191259	24.115			0.191259	0.576471
		0.191259	24.115			0.191259	0.576471
		0.191259	24.115			0.191259	0.576471
		0.191259	24.115			0.191259	0.576471
		0.191259	24.115			0.191259	0.576471
		0.191259	24.115			0.191259	0.576471
		0.191259	24.115			0.191259	0.576471
		0.191508	24.115			0.191508	0.575
		0.191508	24.115			0.191508	0.575
		0.191508	24.115			0.191508	0.575
		0.191508	24.115			0.191508	0.575
		0.191508	24.115			0.191508	0.575
		0.191508	24.115			0.191508	0.575
		0.191508	24.115			0.191508	0.575
		0.191508	24.115			0.191508	0.575
		0.191508	24.115			0.191508	0.575
		0.191508	24.115			0.191508	0.575
		0.191508	24.115			0.191508	0.575
		0.191508	24.115			0.191508	0.575
		0.191508	24.115			0.191508	0.575
		0.191665	24.115			0.191665	0.574074
		0.192115	24.115			0.192115	0.571429
		0.192115	24.115			0.192115	0.571429
		0.192115	24.115			0.192115	0.571429
		0.192115	24.115			0.192115	0.571429
		0.192115	24.115			0.192115	0.571429
		0.192115	24.115			0.192115	0.571429
		0.192115	24.115			0.192115	0.571429
		0.192115	24.115			0.192115	0.571429
		0.192424	24.115			0.192424	0.56962
		0.192424	24.115			0.192424	0.56962
		0.192424	24.115			0.192424	0.56962
		0.192424	24.115			0.192424	0.56962
		0.192424	24.115			0.192424	0.56962
		0.192424	24.115			0.192424	0.56962
		0.192424	24.115			0.192424	0.56962
		0.192424	24.115			0.192424	0.56962
		0.192999	24.115			0.192999	0.566265
		0.192999	24.115			0.192999	0.566265
		0.192999	24.115			0.192999	0.566265
		0.192999	24.115			0.192999	0.566265
		0.192999	24.115			0.192999	0.566265
		0.192999	24.115			0.192999	0.566265
		0.192999	24.115			0.192999	0.566265
		0.192999	24.115			0.192999	0.566265
		0.192999	24.115			0.192999	0.566265
		0.193372	24.115			0.193372	0.564103
		0.193372	24.115			0.193372	0.564103
		0.193372	24.115			0.193372	0.564103
		0.193914	24.115			0.193914	0.560976
		0.193914	24.115			0.193914	0.560976
		0.193914	24.115			0.193914	0.560976
		0.193914	24.115			0.193914	0.560976
		0.193914	24.115			0.193914	0.560976
		0.194355	24.115			0.194355	0.558442
		0.19486	24.115			0.19486	0.555556
		0.19486	24.115			0.19486	0.555556
		0.19486	24.115			0.19486	0.555556
		0.195374	24.115			0.195374	0.552632
		0.195839	24.115			0.195839	0.55
		0.195839	24.115			0.195839	0.55
		0.195839	24.115			0.195839	0.55
		0.195839	24.115			0.195839	0.55
		0.195839	24.115			0.195839	0.55
		0.195839	24.115			0.195839	0.55
		0.196853	24.115			0.196853	0.544304
		0.196853	24.115			0.196853	0.544304
		0.196853	24.115			0.196853	0.544304
		0.197904	24.115			0.197904	0.538462
		0.198995	24.115			0.198995	0.532468
		0.20037	24.115			0.20037	0.525
		0.219514	24.5451			0.219514	0.675214
		0.22269	24.5451			0.22269	0.657658
		0.226581	24.115			0.226581	0.4
		0.227377	24.5451			0.227377	0.632653
		0.228104	24.5451			0.228104	0.628866
		0.228585	24.5451			0.228585	0.626374
		0.22939	24.5451			0.22939	0.622222
		0.22939	24.5451			0.22939	0.622222
		0.23001	24.5451			0.23001	0.619048
		0.23001	24.5451			0.23001	0.619048
		0.23001	24.5451			0.23001	0.619048
		0.23001	24.5451			0.23001	0.619048
		0.23022	24.5451			0.23022	0.617977
		0.23022	24.5451			0.23022	0.617977
		0.23022	24.5451			0.23022	0.617977
		0.23022	24.5451			0.23022	0.617977
		0.23022	24.5451			0.23022	0.617977
		0.23022	24.5451			0.23022	0.617977
		0.230408	24.5451			0.230408	0.617021
		0.230408	24.5451			0.230408	0.617021
		0.230408	24.5451			0.230408	0.617021
		0.230913	24.5451			0.230913	0.614458
		0.230913	24.5451			0.230913	0.614458
		0.231075	24.5451			0.231075	0.613636
		0.231075	24.5451			0.231075	0.613636
		0.231075	24.5451			0.231075	0.613636
		0.231075	24.5451			0.231075	0.613636
		0.231075	24.5451			0.231075	0.613636
		0.231075	24.5451			0.231075	0.613636
		0.23122	24.5451			0.23122	0.612903
		0.23122	24.5451			0.23122	0.612903
		0.231844	24.5451			0.231844	0.609756
		0.231844	24.5451			0.231844	0.609756
		0.231956	24.5451			0.231956	0.609195
		0.231956	24.5451			0.231956	0.609195
		0.231956	24.5451			0.231956	0.609195
		0.231956	24.5451			0.231956	0.609195
		0.231956	24.5451			0.231956	0.609195
		0.231956	24.5451			0.231956	0.609195
		0.231956	24.5451			0.231956	0.609195
		0.231956	24.5451			0.231956	0.609195
		0.231956	24.5451			0.231956	0.609195
		0.231956	24.5451			0.231956	0.609195
		0.231956	24.5451			0.231956	0.609195
		0.231956	24.5451			0.231956	0.609195
		0.232056	24.5451			0.232056	0.608696
		0.232056	24.5451			0.232056	0.608696
		0.232056	24.5451			0.232056	0.608696
		0.232056	24.5451			0.232056	0.608696
		0.232807	24.5451			0.232807	0.604938
		0.232865	24.5451			0.232865	0.604651
		0.232865	24.5451			0.232865	0.604651
		0.232865	24.5451			0.232865	0.604651
		0.232865	24.5451			0.232865	0.604651
		0.232865	24.5451			0.232865	0.604651
		0.232865	24.5451			0.232865	0.604651
		0.232865	24.5451			0.232865	0.604651
		0.232865	24.5451			0.232865	0.604651
		0.232865	24.5451			0.232865	0.604651
		0.232916	24.5451			0.232916	0.604396
		0.232916	24.5451			0.232916	0.604396
		0.232916	24.5451			0.232916	0.604396
		0.233802	24.5451			0.233802	0.6
		0.233802	24.5451			0.233802	0.6
		0.233802	24.5451			0.233802	0.6
		0.233802	24.5451			0.233802	0.6
		0.233802	24.5451			0.233802	0.6
		0.233802	24.5451			0.233802	0.6
		0.233802	24.5451			0.233802	0.6
		0.233802	24.5451			0.233802	0.6
		0.233802	24.5451			0.233802	0.6
		0.233802	24.5451			0.233802	0.6
		0.233802	24.5451			0.233802	0.6
		0.233802	24.5451			0.233802	0.6
		0.233802	24.5451			0.233802	0.6
		0.233802	24.5451			0.233802	0.6
		0.233802	24.5451			0.233802	0.6
		0.233802	24.5451			0.233802	0.6
		0.233802	24.5451			0.233802	0.6
		0.233802	24.5451			0.233802	0.6
		0.234715	24.5451			0.234715	0.595506
		0.234715	24.5451			0.234715	0.595506
		0.234715	24.5451			0.234715	0.595506
		0.234715	24.5451			0.234715	0.595506
		0.234715	24.5451			0.234715	0.595506
		0.234715	24.5451			0.234715	0.595506
		0.234715	24.5451			0.234715	0.595506
		0.234715	24.5451			0.234715	0.595506
		0.234715	24.5451			0.234715	0.595506
		0.234715	24.5451			0.234715	0.595506
		0.234715	24.5451			0.234715	0.595506
		0.234715	24.5451			0.234715	0.595506
		0.234715	24.5451			0.234715	0.595506
		0.234769	24.5451			0.234769	0.595238
		0.234769	24.5451			0.234769	0.595238
		0.234769	24.5451			0.234769	0.595238
		0.234769	24.5451			0.234769	0.595238
		0.234769	24.5451			0.234769	0.595238
		0.234769	24.5451			0.234769	0.595238
		0.234769	24.5451			0.234769	0.595238
		0.234769	24.5451			0.234769	0.595238
		0.234769	24.5451			0.234769	0.595238
		0.235656	24.5451			0.235656	0.590909
		0.235656	24.5451			0.235656	0.590909
		0.235656	24.5451			0.235656	0.590909
		0.235656	24.5451			0.235656	0.590909
		0.235656	24.5451			0.235656	0.590909
		0.235656	24.5451			0.235656	0.590909
		0.235656	24.5451			0.235656	0.590909
		0.235656	24.5451			0.235656	0.590909
		0.235656	24.5451			0.235656	0.590909
		0.235656	24.5451			0.235656	0.590909
		0.235656	24.5451			0.235656	0.590909
		0.235656	24.5451			0.235656	0.590909
		0.235656	24.5451			0.235656	0.590909
		0.235656	24.5451			0.235656	0.590909
		0.235656	24.5451			0.235656	0.590909
		0.235656	24.5451			0.235656	0.590909
		0.235656	24.5451			0.235656	0.590909
		0.235656	24.5451			0.235656	0.590909
		0.235768	24.5451			0.235768	0.590361
		0.235768	24.5451			0.235768	0.590361
		0.235768	24.5451			0.235768	0.590361
		0.235768	24.5451			0.235768	0.590361
		0.235768	24.5451			0.235768	0.590361
		0.235768	24.5451			0.235768	0.590361
		0.235768	24.5451			0.235768	0.590361
		0.235896	24.5451			0.235896	0.589744
		0.235896	24.5451			0.235896	0.589744
		0.236626	24.5451			0.236626	0.586207
		0.236626	24.5451			0.236626	0.586207
		0.236626	24.5451			0.236626	0.586207
		0.236626	24.5451			0.236626	0.586207
		0.236626	24.5451			0.236626	0.586207
		0.236626	24.5451			0.236626	0.586207
		0.236626	24.5451			0.236626	0.586207
		0.236626	24.5451			0.236626	0.586207
		0.236626	24.5451			0.236626	0.586207
		0.236626	24.5451			0.236626	0.586207
		0.236626	24.5451			0.236626	0.586207
		0.236626	24.5451			0.236626	0.586207
		0.236801	24.5451			0.236801	0.585366
		0.236801	24.5451			0.236801	0.585366
		0.236801	24.5451			0.236801	0.585366
		0.236801	24.5451			0.236801	0.585366
		0.236801	24.5451			0.236801	0.585366
		0.236801	24.5451			0.236801	0.585366
		0.236801	24.5451			0.236801	0.585366
		0.236801	24.5451			0.236801	0.585366
		0.236801	24.5451			0.236801	0.585366
		0.236801	24.5451			0.236801	0.585366
		0.236801	24.5451			0.236801	0.585366
		0.236801	24.5451			0.236801	0.585366
		0.236801	24.5451			0.236801	0.585366
		0.236801	24.5451			0.236801	0.585366
		0.236801	24.5451			0.236801	0.585366
		0.236801	24.5451			0.236801	0.585366
		0.236801	24.5451			0.236801	0.585366
		0.236801	24.5451			0.236801	0.585366
		0.237628	24.5451			0.237628	0.581395
		0.237628	24.5451			0.237628	0.581395
		0.237628	24.5451			0.237628	0.581395
		0.237628	24.5451			0.237628	0.581395
		0.237628	24.5451			0.237628	0.581395
		0.237628	24.5451			0.237628	0.581395
		0.237628	24.5451			0.237628	0.581395
		0.237628	24.5451			0.237628	0.581395
		0.237628	24.5451			0.237628	0.581395
		0.237628	24.5451			0.237628	0.581395
		0.237628	24.5451			0.237628	0.581395
		0.237628	24.5451			0.237628	0.581395
		0.237628	24.5451			0.237628	0.581395
		0.237628	24.5451			0.237628	0.581395
		0.237628	24.5451			0.237628	0.581395
		0.237628	24.5451			0.237628	0.581395
		0.237628	24.5451			0.237628	0.581395
		0.237628	24.5451			0.237628	0.581395
		0.237628	24.5451			0.237628	0.581395
		0.237868	24.5451			0.237868	0.580247
		0.237868	24.5451			0.237868	0.580247
		0.237868	24.5451			0.237868	0.580247
		0.237868	24.5451			0.237868	0.580247
		0.237868	24.5451			0.237868	0.580247
		0.237868	24.5451			0.237868	0.580247
		0.237868	24.5451			0.237868	0.580247
		0.237868	24.5451			0.237868	0.580247
		0.237868	24.5451			0.237868	0.580247
		0.237868	24.5451			0.237868	0.580247
		0.237868	24.5451			0.237868	0.580247
		0.237868	24.5451			0.237868	0.580247
		0.23814	24.5451			0.23814	0.578947
		0.238386	24.5451			0.238386	0.577778
		0.238386	24.5451			0.238386	0.577778
		0.238661	24.5451			0.238661	0.576471
		0.238661	24.5451			0.238661	0.576471
		0.238661	24.5451			0.238661	0.576471
		0.238661	24.5451			0.238661	0.576471
		0.238661	24.5451			0.238661	0.576471
		0.238661	24.5451			0.238661	0.576471
		0.238661	24.5451			0.238661	0.576471
		0.238661	24.5451			0.238661	0.576471
		0.238661	24.5451			0.238661	0.576471
		0.238661	24.5451			0.238661	0.576471
		0.238661	24.5451			0.238661	0.576471
		0.238661	24.5451			0.238661	0.576471
		0.238661	24.5451			0.238661	0.576471
		0.238661	24.5451			0.238661	0.576471
		0.238661	24.5451			0.238661	0.576471
		0.238661	24.5451			0.238661	0.576471
		0.238661	24.5451			0.238661	0.576471
		0.238661	24.5451			0.238661	0.576471
		0.238661	24.5451			0.238661	0.576471
		0.238661	24.5451			0.238661	0.576471
		0.238661	24.5451			0.238661	0.576471
		0.238661	24.5451			0.238661	0.576471
		0.238972	24.5451			0.238972	0.575
		0.238972	24.5451			0.238972	0.575
		0.238972	24.5451			0.238972	0.575
		0.238972	24.5451			0.238972	0.575
		0.238972	24.5451			0.238972	0.575
		0.238972	24.5451			0.238972	0.575
		0.239388	24.5451			0.239388	0.573034
		0.239388	24.5451			0.239388	0.573034
		0.239729	24.5451			0.239729	0.571429
		0.239729	24.5451			0.239729	0.571429
		0.239729	24.5451			0.239729	0.571429
		0.239729	24.5451			0.239729	0.571429
		0.239729	24.5451			0.239729	0.571429
		0.239729	24.5451			0.239729	0.571429
		0.239729	24.5451			0.239729	0.571429
		0.239729	24.5451			0.239729	0.571429
		0.239729	24.5451			0.239729	0.571429
		0.239729	24.5451			0.239729	0.571429
		0.239729	24.5451			0.239729	0.571429
		0.239729	24.5451			0.239729	0.571429
		0.239729	24.5451			0.239729	0.571429
		0.239729	24.5451			0.239729	0.571429
		0.240114	24.5451			0.240114	0.56962
		0.240114	24.5451			0.240114	0.56962
		0.240114	24.5451			0.240114	0.56962
		0.240422	24.5451			0.240422	0.568182
		0.240422	24.5451			0.240422	0.568182
		0.240422	24.5451			0.240422	0.568182
		0.240422	24.5451			0.240422	0.568182
		0.240833	24.5451			0.240833	0.566265
		0.240833	24.5451			0.240833	0.566265
		0.240833	24.5451			0.240833	0.566265
		0.240833	24.5451			0.240833	0.566265
		0.240833	24.5451			0.240833	0.566265
		0.240833	24.5451			0.240833	0.566265
		0.240833	24.5451			0.240833	0.566265
		0.240833	24.5451			0.240833	0.566265
		0.240833	24.5451			0.240833	0.566265
		0.240833	24.5451			0.240833	0.566265
		0.240833	24.5451			0.240833	0.566265
		0.240833	24.5451			0.240833	0.566265
		0.240833	24.5451			0.240833	0.566265
		0.241298	24.5451			0.241298	0.564103
		0.241298	24.5451			0.241298	0.564103
		0.241298	24.5451			0.241298	0.564103
		0.241298	24.5451			0.241298	0.564103
		0.241298	24.5451			0.241298	0.564103
		0.241298	24.5451			0.241298	0.564103
		0.241298	24.5451			0.241298	0.564103
		0.241298	24.5451			0.241298	0.564103
		0.241488	24.5451			0.241488	0.563218
		0.241488	24.5451			0.241488	0.563218
		0.241488	24.5451			0.241488	0.563218
		0.241974	24.5451			0.241974	0.560976
		0.241974	24.5451			0.241974	0.560976
		0.241974	24.5451			0.241974	0.560976
		0.241974	24.5451			0.241974	0.560976
		0.241974	24.5451			0.241974	0.560976
		0.241974	24.5451			0.241974	0.560976
		0.241974	24.5451			0.241974	0.560976
		0.241974	24.5451			0.241974	0.560976
		0.241974	24.5451			0.241974	0.560976
		0.241974	24.5451			0.241974	0.560976
		0.241974	24.5451			0.241974	0.560976
		0.241974	24.5451			0.241974	0.560976
		0.241974	24.5451			0.241974	0.560976
		0.241974	24.5451			0.241974	0.560976
		0.241974	24.5451			0.241974	0.560976
		0.241974	24.5451			0.241974	0.560976
		0.241974	24.5451			0.241974	0.560976
		0.241974	24.5451			0.241974	0.560976
		0.242524	24.5451			0.242524	0.558442
		0.242524	24.5451			0.242524	0.558442
		0.24259	24.5451			0.24259	0.55814
		0.24259	24.5451			0.24259	0.55814
		0.243154	24.5451			0.243154	0.555556
		0.243154	24.5451			0.243154	0.555556
		0.243154	24.5451			0.243154	0.555556
		0.243154	24.5451			0.243154	0.555556
		0.243154	24.5451			0.243154	0.555556
		0.243154	24.5451			0.243154	0.555556
		0.243154	24.5451			0.243154	0.555556
		0.243154	24.5451			0.243154	0.555556
		0.243154	24.5451			0.243154	0.555556
		0.243154	24.5451			0.243154	0.555556
		0.243154	24.5451			0.243154	0.555556
		0.243727	24.5451			0.243727	0.552941
		0.243727	24.5451			0.243727	0.552941
		0.243727	24.5451			0.243727	0.552941
		0.24415	24.5451			0.24415	0.55102
		0.244376	24.5451			0.244376	0.55
		0.244376	24.5451			0.244376	0.55
		0.244376	24.5451			0.244376	0.55
		0.244376	24.5451			0.244376	0.55
		0.244376	24.5451			0.244376	0.55
		0.244376	24.5451			0.244376	0.55
		0.244903	24.5451			0.244903	0.547619
		0.244903	24.5451			0.244903	0.547619
		0.245003	24.5451			0.245003	0.54717
		0.245385	24.5451			0.245385	0.545455
		0.245641	24.5451			0.245641	0.544304
		0.245641	24.5451			0.245641	0.544304
		0.245641	24.5451			0.245641	0.544304
		0.246119	24.5451			0.246119	0.542169
		0.246119	24.5451			0.246119	0.542169
		0.246119	24.5451			0.246119	0.542169
		0.246953	24.5451			0.246953	0.538462
		0.247377	24.5451			0.247377	0.536585
		0.247377	24.5451			0.247377	0.536585
		0.24868	24.5451			0.24868	0.530864
		0.24868	24.5451			0.24868	0.530864
		0.25003	24.5451			0.25003	0.525
		0.25288	24.5451			0.25288	0.512821
		0.254654	24.5451			0.254654	0.505376
		0.257291	24.5451			0.257291	0.494505
		0.258175	24.5451			0.258175	0.490909
		0.260128	23.6834			0.260128	0.069767
		0.273834	24.9738			0.273834	0.626374
		0.27445	24.115			0.27445	0.233333
		0.274799	24.9738			0.274799	0.622222
		0.274799	24.9738			0.274799	0.622222
		0.275793	24.9738			0.275793	0.617977
		0.275793	24.9738			0.275793	0.617977
		0.276018	24.9738			0.276018	0.617021
		0.276018	24.9738			0.276018	0.617021
		0.276018	24.9738			0.276018	0.617021
		0.276018	24.9738			0.276018	0.617021
		0.276817	24.9738			0.276817	0.613636
		0.276858	24.5451			0.276858	0.42029
		0.276991	24.9738			0.276991	0.612903
		0.277873	24.9738			0.277873	0.609195
		0.277873	24.9738			0.277873	0.609195
		0.277992	24.9738			0.277992	0.608696
		0.278099	24.9738			0.278099	0.608247
		0.278961	24.9738			0.278961	0.604651
		0.279022	24.9738			0.279022	0.604396
		0.279022	24.9738			0.279022	0.604396
		0.279022	24.9738			0.279022	0.604396
		0.279022	24.9738			0.279022	0.604396
		0.279022	24.9738			0.279022	0.604396
		0.279022	24.9738			0.279022	0.604396
		0.279022	24.9738			0.279022	0.604396
		0.279078	24.9738			0.279078	0.604167
		0.280084	24.9738			0.280084	0.6
		0.280084	24.9738			0.280084	0.6
		0.280084	24.9738			0.280084	0.6
		0.280084	24.9738			0.280084	0.6
		0.280084	24.9738			0.280084	0.6
		0.280084	24.9738			0.280084	0.6
		0.280084	24.9738			0.280084	0.6
		0.280084	24.9738			0.280084	0.6
		0.280084	24.9738			0.280084	0.6
		0.280084	24.9738			0.280084	0.6
		0.280084	24.9738			0.280084	0.6
		0.280084	24.9738			0.280084	0.6
		0.281177	24.9738			0.281177	0.595506
		0.281177	24.9738			0.281177	0.595506
		0.281177	24.9738			0.281177	0.595506
		0.281177	24.9738			0.281177	0.595506
		0.281177	24.9738			0.281177	0.595506
		0.281177	24.9738			0.281177	0.595506
		0.281177	24.9738			0.281177	0.595506
		0.281177	24.9738			0.281177	0.595506
		0.281177	24.9738			0.281177	0.595506
		0.281177	24.9738			0.281177	0.595506
		0.281243	24.9738			0.281243	0.595238
		0.282077	24.9738			0.282077	0.591837
		0.282184	24.9738			0.282184	0.591398
		0.282184	24.9738			0.282184	0.591398
		0.282305	24.9738			0.282305	0.590909
		0.282305	24.9738			0.282305	0.590909
		0.282305	24.9738			0.282305	0.590909
		0.282305	24.9738			0.282305	0.590909
		0.282305	24.9738			0.282305	0.590909
		0.282305	24.9738			0.282305	0.590909
		0.282305	24.9738			0.282305	0.590909
		0.282305	24.9738			0.282305	0.590909
		0.28244	24.9738			0.28244	0.590361
		0.28244	24.9738			0.28244	0.590361
		0.283281	24.9738			0.283281	0.586957
		0.283281	24.9738			0.283281	0.586957
		0.283467	24.9738			0.283467	0.586207
		0.283467	24.9738			0.283467	0.586207
		0.283467	24.9738			0.283467	0.586207
		0.283467	24.9738			0.283467	0.586207
		0.283467	24.9738			0.283467	0.586207
		0.283467	24.9738			0.283467	0.586207
		0.283467	24.9738			0.283467	0.586207
		0.283467	24.9738			0.283467	0.586207
		0.283467	24.9738			0.283467	0.586207
		0.283467	24.9738			0.283467	0.586207
		0.283467	24.9738			0.283467	0.586207
		0.283676	24.9738			0.283676	0.585366
		0.283676	24.9738			0.283676	0.585366
		0.284411	24.9738			0.284411	0.582418
		0.284411	24.9738			0.284411	0.582418
		0.284411	24.9738			0.284411	0.582418
		0.284667	24.9738			0.284667	0.581395
		0.284667	24.9738			0.284667	0.581395
		0.284667	24.9738			0.284667	0.581395
		0.284667	24.9738			0.284667	0.581395
		0.284667	24.9738			0.284667	0.581395
		0.284667	24.9738			0.284667	0.581395
		0.284667	24.9738			0.284667	0.581395
		0.284667	24.9738			0.284667	0.581395
		0.284667	24.9738			0.284667	0.581395
		0.284667	24.9738			0.284667	0.581395
		0.284667	24.9738			0.284667	0.581395
		0.284667	24.9738			0.284667	0.581395
		0.284667	24.9738			0.284667	0.581395
		0.284667	24.9738			0.284667	0.581395
		0.284667	24.9738			0.284667	0.581395
		0.284955	24.9738			0.284955	0.580247
		0.284955	24.9738			0.284955	0.580247
		0.284955	24.9738			0.284955	0.580247
		0.285281	24.9738			0.285281	0.578947
		0.285576	24.9738			0.285576	0.577778
		0.285576	24.9738			0.285576	0.577778
		0.285576	24.9738			0.285576	0.577778
		0.285905	24.9738			0.285905	0.576471
		0.285905	24.9738			0.285905	0.576471
		0.285905	24.9738			0.285905	0.576471
		0.285905	24.9738			0.285905	0.576471
		0.285905	24.9738			0.285905	0.576471
		0.285905	24.9738			0.285905	0.576471
		0.285905	24.9738			0.285905	0.576471
		0.286277	24.9738			0.286277	0.575
		0.286412	24.9738			0.286412	0.574468
		0.286776	24.9738			0.286776	0.573034
		0.286776	24.9738			0.286776	0.573034
		0.287185	24.9738			0.287185	0.571429
		0.287185	24.9738			0.287185	0.571429
		0.287185	24.9738			0.287185	0.571429
		0.287185	24.9738			0.287185	0.571429
		0.287185	24.9738			0.287185	0.571429
		0.287185	24.9738			0.287185	0.571429
		0.287185	24.9738			0.287185	0.571429
		0.287185	24.9738			0.287185	0.571429
		0.287185	24.9738			0.287185	0.571429
		0.287185	24.9738			0.287185	0.571429
		0.287185	24.9738			0.287185	0.571429
		0.287646	24.9738			0.287646	0.56962
		0.288014	24.9738			0.288014	0.568182
		0.288014	24.9738			0.288014	0.568182
		0.288014	24.9738			0.288014	0.568182
		0.288014	24.9738			0.288014	0.568182
		0.288506	24.9738			0.288506	0.566265
		0.288506	24.9738			0.288506	0.566265
		0.288506	24.9738			0.288506	0.566265
		0.288506	24.9738			0.288506	0.566265
		0.289064	24.9738			0.289064	0.564103
		0.289064	24.9738			0.289064	0.564103
		0.289292	24.9738			0.289292	0.563218
		0.289292	24.9738			0.289292	0.563218
		0.289292	24.9738			0.289292	0.563218
		0.289292	24.9738			0.289292	0.563218
		0.289292	24.9738			0.289292	0.563218
		0.289292	24.9738			0.289292	0.563218
		0.289292	24.9738			0.289292	0.563218
		0.289873	24.9738			0.289873	0.560976
		0.289873	24.9738			0.289873	0.560976
		0.289873	24.9738			0.289873	0.560976
		0.289873	24.9738			0.289873	0.560976
		0.289873	24.9738			0.289873	0.560976
		0.289873	24.9738			0.289873	0.560976
		0.289873	24.9738			0.289873	0.560976
		0.290532	24.9738			0.290532	0.558442
		0.290611	24.9738			0.290611	0.55814
		0.290611	24.9738			0.290611	0.55814
		0.290611	24.9738			0.290611	0.55814
		0.290611	24.9738			0.290611	0.55814
		0.291287	24.9738			0.291287	0.555556
		0.291287	24.9738			0.291287	0.555556
		0.291287	24.9738			0.291287	0.555556
		0.291287	24.9738			0.291287	0.555556
		0.291287	24.9738			0.291287	0.555556
		0.291287	24.9738			0.291287	0.555556
		0.291287	24.9738			0.291287	0.555556
		0.291287	24.9738			0.291287	0.555556
		0.291287	24.9738			0.291287	0.555556
		0.291287	24.9738			0.291287	0.555556
		0.291287	24.9738			0.291287	0.555556
		0.291974	24.9738			0.291974	0.552941
		0.291974	24.9738			0.291974	0.552941
		0.291974	24.9738			0.291974	0.552941
		0.291974	24.9738			0.291974	0.552941
		0.291974	24.9738			0.291974	0.552941
		0.292481	24.9738			0.292481	0.55102
		0.292602	24.9738			0.292602	0.550562
		0.292602	24.9738			0.292602	0.550562
		0.292751	24.9738			0.292751	0.55
		0.292751	24.9738			0.292751	0.55
		0.292751	24.9738			0.292751	0.55
		0.292751	24.9738			0.292751	0.55
		0.292751	24.9738			0.292751	0.55
		0.293383	24.9738			0.293383	0.547619
		0.29396	24.9738			0.29396	0.545455
		0.294267	24.9738			0.294267	0.544304
		0.294267	24.9738			0.294267	0.544304
		0.294267	24.9738			0.294267	0.544304
		0.294267	24.9738			0.294267	0.544304
		0.294655	24.9738			0.294655	0.542857
		0.294839	24.9738			0.294839	0.542169
		0.294839	24.9738			0.294839	0.542169
		0.294839	24.9738			0.294839	0.542169
		0.294839	24.9738			0.294839	0.542169
		0.294974	24.9738			0.294974	0.541667
		0.295839	24.9738			0.295839	0.538462
		0.295839	24.9738			0.295839	0.538462
		0.296347	24.9738			0.296347	0.536585
		0.296347	24.9738			0.296347	0.536585
		0.296347	24.9738			0.296347	0.536585
		0.296809	24.9738			0.296809	0.534884
		0.296809	24.9738			0.296809	0.534884
		0.297724	24.9738			0.297724	0.531532
		0.297907	24.9738			0.297907	0.530864
		0.297907	24.9738			0.297907	0.530864
		0.297907	24.9738			0.297907	0.530864
		0.297907	24.9738			0.297907	0.530864
		0.298306	24.9738			0.298306	0.529412
		0.298306	24.9738			0.298306	0.529412
		0.29867	24.9738			0.29867	0.52809
		0.29916	24.9738			0.29916	0.526316
		0.299524	24.9738			0.299524	0.525
		0.299524	24.9738			0.299524	0.525
		0.299524	24.9738			0.299524	0.525
		0.299854	24.9738			0.299854	0.52381
		0.3012	24.9738			0.3012	0.518987
		0.301457	24.9738			0.301457	0.518072
		0.301457	24.9738			0.301457	0.518072
		0.30169	24.9738			0.30169	0.517241
		0.302939	24.9738			0.302939	0.512821
		0.303902	24.9738			0.303902	0.509434
		0.304743	24.9738			0.304743	0.506494
		0.304835	24.9738			0.304835	0.506173
		0.304835	24.9738			0.304835	0.506173
		0.304835	24.9738			0.304835	0.506173
		0.305064	24.9738			0.305064	0.505376
		0.306618	24.9738			0.306618	0.5
		0.306618	24.9738			0.306618	0.5
		0.310202	24.9738			0.310202	0.487805
		0.310388	24.9738			0.310388	0.487179
		0.310594	24.9738			0.310594	0.486486
		0.313066	24.9738			0.313066	0.478261
		0.313694	24.9738			0.313694	0.47619
		0.313694	24.9738			0.313694	0.47619
		0.314739	25.401			0.314739	0.642105
		0.316095	24.9738			0.316095	0.468354
		0.320053	25.401			0.320053	0.622222
		0.320918	25.401			0.320918	0.619048
		0.32121	25.401			0.32121	0.617977
		0.321688	24.9738			0.321688	0.450549
		0.323896	25.401			0.323896	0.608247
		0.323896	25.401			0.323896	0.608247
		0.3249	25.401			0.3249	0.604651
		0.326208	25.401			0.326208	0.6
		0.327352	25.401			0.327352	0.59596
		0.328654	25.401			0.328654	0.591398
		0.328794	25.401			0.328794	0.590909
		0.328794	25.401			0.328794	0.590909
		0.330981	25.401			0.330981	0.583333
		0.331248	25.401			0.331248	0.582418
		0.331248	25.401			0.331248	0.582418
		0.332988	25.401			0.332988	0.576471
		0.332988	25.401			0.332988	0.576471
		0.333421	25.401			0.333421	0.575
		0.334002	25.401			0.334002	0.573034
		0.334002	25.401			0.334002	0.573034
		0.334145	24.9738			0.334145	0.413043
		0.334214	24.9738			0.334214	0.412844
		0.334478	25.401			0.334478	0.571429
		0.334587	24.9738			0.334587	0.411765
		0.334587	24.9738			0.334587	0.411765
		0.335444	25.401			0.335444	0.568182
		0.335444	25.401			0.335444	0.568182
		0.335444	25.401			0.335444	0.568182
		0.336331	25.401			0.336331	0.565217
		0.336331	25.401			0.336331	0.565217
		0.336385	24.9738			0.336385	0.406593
		0.336932	25.401			0.336932	0.563218
		0.337149	25.401			0.337149	0.5625
		0.337467	24.9738			0.337467	0.403509
		0.337771	25.401			0.337771	0.56044
		0.338469	25.401			0.338469	0.55814
		0.339256	25.401			0.339256	0.555556
		0.339256	25.401			0.339256	0.555556
		0.339256	25.401			0.339256	0.555556
		0.339979	25.401			0.339979	0.553191
		0.340056	25.401			0.340056	0.552941
		0.340056	25.401			0.340056	0.552941
		0.340788	25.401			0.340788	0.550562
		0.340961	25.401			0.340961	0.55
		0.343103	24.9738			0.343103	0.387755
		0.343393	25.401			0.343393	0.542169
		0.343587	24.5451			0.343587	0.230769
		0.344001	25.401			0.344001	0.54023
		0.344001	25.401			0.344001	0.54023
		0.345068	25.401			0.345068	0.536842
		0.345149	25.401			0.345149	0.536585
		0.345149	25.401			0.345149	0.536585
		0.345149	25.401			0.345149	0.536585
		0.345687	25.401			0.345687	0.534884
		0.345687	25.401			0.345687	0.534884
		0.347431	25.401			0.347431	0.529412
		0.347431	25.401			0.347431	0.529412
		0.348849	25.401			0.348849	0.525
		0.348849	25.401			0.348849	0.525
		0.348849	25.401			0.348849	0.525
		0.349234	25.401			0.349234	0.52381
		0.349234	25.401			0.349234	0.52381
		0.349234	25.401			0.349234	0.52381
		0.349234	25.401			0.349234	0.52381
		0.349234	25.401			0.349234	0.52381
		0.349585	25.401			0.349585	0.522727
		0.3511	25.401			0.3511	0.518072
		0.352431	25.401			0.352431	0.514019
		0.353033	25.401			0.353033	0.512195
		0.353392	25.401			0.353392	0.511111
		0.353392	25.401			0.353392	0.511111
		0.353392	25.401			0.353392	0.511111
		0.355035	25.401			0.355035	0.506173
		0.355132	25.401			0.355132	0.505882
		0.355302	25.401			0.355302	0.505376
		0.357111	25.401			0.357111	0.5
		0.357111	25.401			0.357111	0.5
		0.357111	25.401			0.357111	0.5
		0.357111	25.401			0.357111	0.5
		0.359066	25.401			0.359066	0.494253
		0.359161	25.401			0.359161	0.493976
		0.359161	25.401			0.359161	0.493976
		0.361089	25.401			0.361089	0.488372
		0.361089	25.401			0.361089	0.488372
		0.363488	25.401			0.363488	0.481481
		0.364008	25.401			0.364008	0.48
		0.365353	25.401			0.365353	0.47619
		0.369933	25.401			0.369933	0.463415
		0.370616	25.401			0.370616	0.461538
		0.370931	25.401			0.370931	0.460674
		0.372645	25.401			0.372645	0.456
		0.373482	25.8268			0.373482	0.59596
		0.373983	25.401			0.373983	0.452381
		0.376673	25.8268			0.376673	0.586207
		0.378732	25.8268			0.378732	0.58
		0.378732	25.8268			0.378732	0.58
		0.381069	25.8268			0.381069	0.573034
		0.381143	25.8268			0.381143	0.572816
		0.382065	25.8268			0.382065	0.570093
		0.383114	25.8268			0.383114	0.56701
		0.383727	25.8268			0.383727	0.565217
		0.384413	25.8268			0.384413	0.563218
		0.38466	25.8268			0.38466	0.5625
		0.385522	25.8268			0.385522	0.56
		0.386166	25.8268			0.386166	0.55814
		0.386401	24.9738			0.386401	0.282051
		0.386652	25.401			0.386652	0.419355
		0.386652	25.401			0.386652	0.419355
		0.386836	24.5451			0.386836	0.142857
		0.387064	25.8268			0.387064	0.555556
		0.387064	25.8268			0.387064	0.555556
		0.387889	25.8268			0.387889	0.553191
		0.38865	25.8268			0.38865	0.55102
		0.390282	25.8268			0.390282	0.546392
		0.390766	25.401			0.390766	0.409091
		0.391025	25.401			0.391025	0.408451
		0.391784	25.8268			0.391784	0.542169
		0.391784	25.8268			0.391784	0.542169
		0.392447	25.401			0.392447	0.404959
		0.392477	25.8268			0.392477	0.54023
		0.393112	25.8268			0.393112	0.538462
		0.393694	25.8268			0.393694	0.536842
		0.395287	25.401			0.395287	0.398058
		0.39639	25.8268			0.39639	0.529412
		0.396874	25.8268			0.396874	0.52809
		0.397287	25.401			0.397287	0.393258
		0.398009	25.8268			0.398009	0.525
		0.400577	25.8268			0.400577	0.518072
		0.40175	25.401			0.40175	0.382716
		0.402996	25.8268			0.402996	0.511628
		0.402996	25.8268			0.402996	0.511628
		0.402996	25.8268			0.402996	0.511628
		0.405278	25.8268			0.405278	0.505618
		0.407435	25.8268			0.407435	0.5
		0.407435	25.8268			0.407435	0.5
		0.407435	25.8268			0.407435	0.5
		0.407435	25.8268			0.407435	0.5
		0.407435	25.8268			0.407435	0.5
		0.407435	25.8268			0.407435	0.5
		0.407435	25.8268			0.407435	0.5
		0.409247	25.8268			0.409247	0.495327
		0.411255	25.8268			0.411255	0.490196
		0.412198	25.8268			0.412198	0.487805
		0.413972	25.8268			0.413972	0.483333
		0.414363	25.8268			0.414363	0.482353
		0.416838	25.8268			0.416838	0.47619
		0.417994	26.2512			0.417994	0.6
		0.419403	25.8268			0.419403	0.46988
		0.423044	26.2512			0.423044	0.586207
		0.423202	25.8268			0.423202	0.460674
		0.423526	26.2512			0.423526	0.584906
		0.425751	26.2512			0.425751	0.578947
		0.427278	25.8268			0.427278	0.45098
		0.428429	25.8268			0.428429	0.448276
		0.428591	26.2512			0.428591	0.571429
		0.429659	26.2512			0.429659	0.568627
		0.430278	26.2512			0.430278	0.56701
		0.430278	26.2512			0.430278	0.56701
		0.430676	25.8268			0.430676	0.443038
		0.431185	25.8268			0.431185	0.44186
		0.435641	26.2512			0.435641	0.553191
		0.435676	25.8268			0.435676	0.431579
		0.437007	25.8268			0.437007	0.428571
		0.437007	25.8268			0.437007	0.428571
		0.437286	26.2512			0.437286	0.54902
		0.438361	25.8268			0.438361	0.425532
		0.438702	26.2512			0.438702	0.545455
		0.440886	26.2512			0.440886	0.54
		0.442764	26.2512			0.442764	0.535354
		0.442764	26.2512			0.442764	0.535354
		0.442785	25.8268			0.442785	0.41573
		0.443322	26.2512			0.443322	0.533981
		0.443585	26.2512			0.443585	0.533333
		0.445645	26.2512			0.445645	0.528302
		0.44699	25.8268			0.44699	0.406593
		0.451858	25.8268			0.451858	0.396226
		0.452045	25.8268			0.452045	0.395833
		0.452607	26.2512			0.452607	0.511628
		0.452947	25.8268			0.452947	0.393939
		0.453212	26.2512			0.453212	0.510204
		0.454314	26.6741			0.454314	0.623762
		0.455457	26.2512			0.455457	0.504951
		0.455537	24.9738			0.455537	0.15493
		0.457593	26.2512			0.457593	0.5
		0.457593	26.2512			0.457593	0.5
		0.457593	26.2512			0.457593	0.5
		0.458454	25.401			0.458454	0.266667
		0.460098	26.2512			0.460098	0.494253
		0.46022	26.2512			0.46022	0.493976
		0.460354	26.2512			0.460354	0.493671
		0.461361	25.8268			0.461361	0.376623
		0.463638	26.2512			0.463638	0.486239
		0.464979	25.8268			0.464979	0.369369
		0.465765	26.2512			0.465765	0.481481
		0.468153	26.2512			0.468153	0.47619
		0.471034	26.2512			0.471034	0.46988
		0.471208	25.8268			0.471208	0.357143
		0.473126	26.2512			0.473126	0.465347
		0.473233	26.2512			0.473233	0.465116
		0.474511	26.2512			0.474511	0.462366
		0.474511	26.2512			0.474511	0.462366
		0.475301	26.2512			0.475301	0.460674
		0.475617	26.2512			0.475617	0.46
		0.476168	26.2512			0.476168	0.458824
		0.477251	26.2512			0.477251	0.456522
		0.477696	26.6741			0.477696	0.566038
		0.4789	26.6741			0.4789	0.563218
		0.480347	26.2512			0.480347	0.45
		0.483141	26.6741			0.483141	0.553398
		0.483633	27.0957			0.483633	0.661017
		0.48447	26.2512			0.48447	0.441441
		0.485647	26.2512			0.485647	0.439024
		0.487449	25.8268			0.487449	0.326733
		0.487944	26.2512			0.487944	0.434343
		0.488307	26.6741			0.488307	0.541667
		0.49097	26.6741			0.49097	0.535714
		0.493096	26.2512			0.493096	0.424
		0.495441	25.8268			0.495441	0.3125
		0.498143	26.6741			0.498143	0.52
		0.500101	26.6741			0.500101	0.515789
		0.502722	26.6741			0.502722	0.510204
		0.502722	26.6741			0.502722	0.510204
		0.502911	26.6741			0.502911	0.509804
		0.50324	26.2512			0.50324	0.404255
		0.504625	25.8268			0.504625	0.296703
		0.504895	26.6741			0.504895	0.505618
		0.505212	26.6741			0.505212	0.504951
		0.505481	26.2512			0.505481	0.4
		0.506621	26.2512			0.506621	0.397849
		0.507582	26.6741			0.507582	0.5
		0.507582	26.6741			0.507582	0.5
		0.507582	26.6741			0.507582	0.5
		0.508708	26.2512			0.508708	0.393939
		0.509171	27.0957			0.509171	0.6
		0.510495	26.6741			0.510495	0.493976
		0.515762	26.2512			0.515762	0.380952
		0.518255	26.6741			0.518255	0.478261
		0.518255	26.6741			0.518255	0.478261
		0.519061	26.2512			0.519061	0.375
		0.519295	26.6741			0.519295	0.47619
		0.521222	25.8268			0.521222	0.269565
		0.522792	27.0957			0.522792	0.569892
		0.52493	26.6741			0.52493	0.465116
		0.527574	26.6741			0.527574	0.46
		0.528425	27.0957			0.528425	0.557895
		0.533362	26.6741			0.533362	0.44898
		0.533736	26.6741			0.533736	0.448276
		0.534085	26.6741			0.534085	0.447619
		0.535781	26.6741			0.535781	0.444444
		0.535781	26.6741			0.535781	0.444444
		0.537056	27.0957			0.537056	0.54
		0.537708	26.6741			0.537708	0.44086
		0.539576	27.0957			0.539576	0.534884
		0.540729	26.6741			0.540729	0.435294
		0.546245	26.6741			0.546245	0.425287
		0.547458	26.2512			0.547458	0.326733
		0.547701	26.6741			0.547701	0.42268
		0.547858	26.2512			0.547858	0.326087
		0.548737	26.2512			0.548737	0.324675
		0.54952	27.0957			0.54952	0.515152
		0.549822	27.0957			0.549822	0.514563
		0.549993	26.6741			0.549993	0.418605
		0.552243	26.6741			0.552243	0.414634
		0.55315	26.6741			0.55315	0.413043
		0.554699	27.0957			0.554699	0.505155
		0.554699	27.0957			0.554699	0.505155
		0.559355	26.6741			0.559355	0.402299
		0.559983	27.0957			0.559983	0.495146
		0.562849	27.0957			0.562849	0.489796
		0.562849	27.0957			0.562849	0.489796
		0.563443	26.6741			0.563443	0.395349
		0.567979	26.6741			0.567979	0.387755
		0.568954	26.6741			0.568954	0.386139
		0.569268	26.2512			0.569268	0.292929
		0.57087	26.6741			0.57087	0.382979
		0.572303	27.0957			0.572303	0.472527
		0.573521	26.6741			0.573521	0.378641
		0.574934	26.6741			0.574934	0.376344
		0.577569	26.6741			0.577569	0.372093
		0.577677	27.0957			0.577677	0.462963
		0.579943	26.2512			0.579943	0.277311
		0.583153	26.2512			0.583153	0.272727
		0.585391	27.0957			0.585391	0.449541
		0.585918	26.2512			0.585918	0.268817
		0.587589	27.0957			0.587589	0.445783
		0.587655	27.5159			0.587655	0.534884
		0.597865	27.0957			0.597865	0.428571
		0.599477	27.0957			0.599477	0.425926
		0.601222	27.0957			0.601222	0.423077
		0.605186	27.0957			0.605186	0.416667
		0.607075	27.5159			0.607075	0.5
		0.607876	26.6741			0.607876	0.325843
		0.610415	27.9348			0.610415	0.579832
		0.611937	27.0957			0.611937	0.405941
		0.613489	27.0957			0.613489	0.403509
		0.614264	27.0957			0.614264	0.402299
		0.616385	26.2512			0.616385	0.22807
		0.620116	27.0957			0.620116	0.393258
		0.621955	27.5159			0.621955	0.474747
		0.624476	27.5159			0.624476	0.470588
		0.626871	27.5159			0.626871	0.466667
		0.627682	27.5159			0.627682	0.465347
		0.628222	26.6741			0.628222	0.297297
		0.631372	27.0957			0.631372	0.376344
		0.642643	27.0957			0.642643	0.36
		0.643107	27.5159			0.643107	0.44086
		0.643595	25.8268			0.643595	0.112676
		0.645778	27.0957			0.645778	0.355556
		0.645778	27.0957			0.645778	0.355556
		0.646764	27.0957			0.646764	0.354167
		0.649154	27.5159			0.649154	0.431579
		0.649925	26.6741			0.649925	0.268817
		0.651137	27.5159			0.651137	0.428571
		0.651943	27.0957			0.651943	0.346939
		0.656581	27.9348			0.656581	0.5
		0.659262	26.6741			0.659262	0.257143
		0.660029	26.6741			0.660029	0.256198
		0.661922	27.0957			0.661922	0.333333
		0.662502	27.9348			0.662502	0.490566
		0.668997	27.5159			0.668997	0.402299
		0.671704	27.0957			0.671704	0.320388
		0.676765	27.5159			0.676765	0.391304
		0.677316	27.0957			0.677316	0.313131
		0.679495	27.0957			0.679495	0.310345
		0.68158	27.5159			0.68158	0.384615
		0.681989	27.9348			0.681989	0.460674
		0.682769	27.5159			0.682769	0.382979
		0.684234	27.0957			0.684234	0.304348
		0.685847	27.0957			0.685847	0.302326
		0.686127	27.9348			0.686127	0.454545
		0.688852	27.9348			0.688852	0.450549
		0.691755	27.5159			0.691755	0.370787
		0.695097	27.0957			0.695097	0.290909
		0.695579	27.0957			0.695579	0.290323
		0.69676	27.0957			0.69676	0.288889
		0.703319	27.5159			0.703319	0.355556
		0.707398	27.0957			0.707398	0.27619
		0.708809	27.9348			0.708809	0.422222
		0.710352	27.5159			0.710352	0.346535
		0.713857	27.5159			0.713857	0.342105
		0.714368	27.5159			0.714368	0.341463
		0.715196	27.5159			0.715196	0.340426
		0.715196	27.5159			0.715196	0.340426
		0.715837	27.5159			0.715837	0.339623
		0.722077	27.9348			0.722077	0.404255
		0.723976	28.3523			0.723976	0.473684
		0.727029	27.5159			0.727029	0.325843
		0.728114	27.0957			0.728114	0.252525
		0.728284	27.0957			0.728284	0.252336
		0.729889	28.3523			0.729889	0.465347
		0.731556	27.5159			0.731556	0.320388
		0.732984	27.5159			0.732984	0.318681
		0.733732	28.3523			0.733732	0.46
		0.735417	27.5159			0.735417	0.315789
		0.738653	27.9348			0.738653	0.382716
		0.742271	27.0957			0.742271	0.237113
		0.745533	27.0957			0.745533	0.233645
		0.748472	28.3523			0.748472	0.44
		0.753012	27.0957			0.753012	0.225806
		0.755213	27.0957			0.755213	0.223529
		0.766766	27.9348			0.766766	0.348315
		0.766766	27.9348			0.766766	0.348315
		0.767579	27.5159			0.767579	0.279279
		0.767935	27.9348			0.767935	0.346939
		0.7692	27.9348			0.7692	0.345455
		0.77287	27.9348			0.77287	0.341176
		0.773518	27.9348			0.773518	0.340426
		0.779689	27.9348			0.779689	0.333333
		0.779689	27.9348			0.779689	0.333333
		0.779689	27.9348			0.779689	0.333333
		0.781562	28.3523			0.781562	0.397849
		0.783672	27.5159			0.783672	0.262136
		0.784511	27.5159			0.784511	0.261261
		0.785353	27.9348			0.785353	0.326923
		0.786032	27.0957			0.786032	0.192982
		0.786965	28.3523			0.786965	0.391304
		0.791832	27.0957			0.791832	0.1875
		0.793696	27.9348			0.793696	0.317647
		0.799598	28.3523			0.799598	0.376344
		0.799682	27.9348			0.799682	0.311111
		0.800753	28.3523			0.800753	0.375
		0.811044	27.9348			0.811044	0.298969
		0.814785	28.3523			0.814785	0.358974
		0.816958	25.8268			0.816958	-0.029126
		0.817452	27.5159			0.817452	0.228346
		0.82293	27.0957			0.82293	0.15942
		0.823918	28.3523			0.823918	0.348837
		0.82484	28.3523			0.82484	0.347826
		0.82484	28.3523			0.82484	0.347826
		0.829037	27.5159			0.829037	0.217391
		0.83674	27.9348			0.83674	0.272727
		0.83674	27.9348			0.83674	0.272727
		0.837394	27.5159			0.837394	0.209677
		0.838288	28.3523			0.838288	0.333333
		0.840287	27.9348			0.840287	0.269231
		0.841946	27.9348			0.841946	0.267606
		0.844206	28.3523			0.844206	0.327103
		0.844959	28.3523			0.844959	0.326316
		0.85057	27.9348			0.85057	0.259259
		0.850658	28.7684			0.850658	0.381443
		0.852825	28.3523			0.852825	0.318182
		0.853999	28.7684			0.853999	0.377778
		0.854182	27.9348			0.854182	0.255814
		0.85644	27.5159			0.85644	0.192661
		0.862388	27.5159			0.862388	0.1875
		0.86395	28.3523			0.86395	0.306931
		0.869798	28.7684			0.869798	0.360825
		0.869798	28.7684			0.869798	0.360825
		0.876979	28.3523			0.876979	0.294118
		0.879516	28.3523			0.879516	0.291667
		0.881984	29.5969			0.881984	0.465347
		0.889021	28.3523			0.889021	0.282609
		0.889581	26.6741			0.889581	0.046729
		0.889819	28.7684			0.889819	0.340206
		0.896699	28.7684			0.896699	0.333333
		0.89948	27.9348			0.89948	0.214953
		0.908985	27.9348			0.908985	0.206897
		0.90995	28.7684			0.90995	0.320388
		0.91124	28.7684			0.91124	0.319149
		0.930018	29.1833			0.930018	0.357143
		0.931577	27.9348			0.931577	0.188406
		0.932832	28.3523			0.932832	0.243243
		0.934587	28.7684			0.934587	0.297297
		0.938883	28.3523			0.938883	0.238095
		0.941803	27.9348			0.941803	0.180328
		0.94455	28.3523			0.94455	0.233333
		0.945257	28.7684			0.945257	0.287671
		0.946426	29.5969			0.946426	0.395833
		0.954998	28.7684			0.954998	0.27907
		0.955822	28.7684			0.955822	0.278351
		0.958304	28.7684			0.958304	0.27619
		0.960789	28.3523			0.960789	0.22
		0.964516	28.7684			0.964516	0.270833
		0.964796	27.9348			0.964796	0.162791
		0.964796	27.9348			0.964796	0.162791
		0.966875	28.7684			0.966875	0.268817
		0.968636	29.1833			0.968636	0.320755
		0.978984	28.7684			0.978984	0.258621
		0.989951	29.1833			0.989951	0.301887
		0.999003	29.1833			0.999003	0.294118
		1.0004	29.1833			1.0004	0.292929
		1.00189	29.1833			1.00189	0.291667
		1.00532	28.7684			1.00532	0.237288
		1.01548	28.7684			1.01548	0.229358
		1.02234	29.1833			1.02234	0.274725
		1.02691	29.1833			1.02691	0.271028
		1.02838	28.7684			1.02838	0.219512
		1.0334	24.5451			1.0334	-0.294118
		1.03653	29.5969			1.03653	0.313131
		1.0429	30.0091			1.0429	0.357143
		1.05088	29.1833			1.05088	0.252174
		1.0632	28.3523			1.0632	0.145299
		1.06333	29.1833			1.06333	0.242718
		1.06975	28.7684			1.06975	0.189542
		1.08282	29.1833			1.08282	0.228346
		1.09294	29.5969			1.09294	0.268293
		1.09516	29.1833			1.09516	0.219512
		1.10693	30.0091			1.10693	0.304348
		1.12978	30.0091			1.12978	0.286957
		1.16306	30.4201			1.16306	0.306931
		1.1729	29.1833			1.1729	0.168142
		1.18161	30.0091			1.18161	0.25
		1.191	26.2512			1.191	-0.15
		1.19535	30.0091			1.19535	0.240741
		1.19546	30.8298			1.19546	0.326316
		1.20694	29.5969			1.20694	0.190476
		1.21077	29.5969			1.21077	0.188119
		1.21904	30.4201			1.21904	0.267327
		1.22678	30.0091			1.22678	0.220339
		1.23741	30.0091			1.23741	0.213675
		1.24526	30.4201			1.24526	0.25
		1.26281	30.8298			1.26281	0.279279
		1.26841	30.4201			1.26841	0.235294
		1.28233	29.1833			1.28233	0.106383
		1.30013	30.4201			1.30013	0.216
		1.30122	29.1833			1.30122	0.096774
		1.31122	30.0091			1.31122	0.17037
		1.32767	30.4201			1.32767	0.2
		1.33958	30.4201			1.33958	0.193277
		1.35895	30.4201			1.35895	0.182609
		1.38908	30.8298			1.38908	0.20339
		1.42398	29.1833			1.42398	0.040541
		1.46941	31.2383			1.46941	0.196581
		1.50236	30.0091			1.50236	0.078014
		1.50978	31.2383			1.50978	0.176471
		1.52367	30.4201			1.52367	0.102804
		1.54458	30.8298			1.54458	0.126984
		1.54458	30.8298			1.54458	0.126984
		1.54698	30.8298			1.54698	0.125926
		1.55133	31.2383			1.55133	0.156863
		1.56199	31.2383			1.56199	0.152
		1.57751	31.2383			1.57751	0.145038
		1.57794	29.5969			1.57794	0.015075
		1.65004	31.6455			1.65004	0.145038
		1.6608	31.6455			1.6608	0.140496
		1.70271	31.2383			1.70271	0.093525

## Sheet: ECI_NDVI1996
ECI1996	LST1996	ECI1996	NDVI1996
0.079916	19.7298	0.079916	0.187097
0.10271	20.1754	0.10271	0.56044
0.103982	20.1754	0.103982	0.547619
0.148188	20.6194	0.148188	0.6
0.150767	20.6194	0.150767	0.581395
0.152654	20.6194	0.152654	0.568182
0.15412	20.6194	0.15412	0.55814
0.154502	20.6194	0.154502	0.555556
0.161202	20.6194	0.161202	0.512195
0.196433	21.0619	0.196433	0.604396
0.199621	21.0619	0.199621	0.586957
0.200659	21.0619	0.200659	0.581395
0.201341	21.0619	0.201341	0.577778
0.201588	21.0619	0.201588	0.576471
0.201588	21.0619	0.201588	0.576471
0.20354	21.0619	0.20354	0.566265
0.20354	21.0619	0.20354	0.566265
0.20354	21.0619	0.20354	0.566265
0.20413	21.0619	0.20413	0.563218
0.204567	21.0619	0.204567	0.560976
0.204671	21.0619	0.204671	0.56044
0.205122	21.0619	0.205122	0.55814
0.205122	21.0619	0.205122	0.55814
0.205122	21.0619	0.205122	0.55814
0.20563	21.0619	0.20563	0.555556
0.206731	21.0619	0.206731	0.55
0.206731	21.0619	0.206731	0.55
0.207206	21.0619	0.207206	0.547619
0.207206	21.0619	0.207206	0.547619
0.207206	21.0619	0.207206	0.547619
0.207206	21.0619	0.207206	0.547619
0.208303	21.0619	0.208303	0.542169
0.208303	21.0619	0.208303	0.542169
0.208303	21.0619	0.208303	0.542169
0.208303	21.0619	0.208303	0.542169
0.210615	21.0619	0.210615	0.530864
0.210615	21.0619	0.210615	0.530864
0.210916	21.0619	0.210916	0.529412
0.211835	21.0619	0.211835	0.525
0.212084	21.0619	0.212084	0.52381
0.212311	21.0619	0.212311	0.522727
0.212311	21.0619	0.212311	0.522727
0.215848	21.0619	0.215848	0.506173
0.235047	21.0619	0.235047	0.425
0.242297	21.5027	0.242297	0.617021
0.247111	21.5027	0.247111	0.595506
0.248051	21.5027	0.248051	0.591398
0.248051	21.5027	0.248051	0.591398
0.248164	21.5027	0.248164	0.590909
0.24829	21.5027	0.24829	0.590361
0.24829	21.5027	0.24829	0.590361
0.248432	21.5027	0.248432	0.589744
0.249446	21.5027	0.249446	0.585366
0.249446	21.5027	0.249446	0.585366
0.250133	21.5027	0.250133	0.582418
0.250372	21.5027	0.250372	0.581395
0.250372	21.5027	0.250372	0.581395
0.250372	21.5027	0.250372	0.581395
0.250642	21.5027	0.250642	0.580247
0.250642	21.5027	0.250642	0.580247
0.250642	21.5027	0.250642	0.580247
0.251223	21.5027	0.251223	0.577778
0.251879	21.5027	0.251879	0.575
0.251879	21.5027	0.251879	0.575
0.252346	21.5027	0.252346	0.573034
0.252346	21.5027	0.252346	0.573034
0.252346	21.5027	0.252346	0.573034
0.252346	21.5027	0.252346	0.573034
0.252729	21.5027	0.252729	0.571429
0.252729	21.5027	0.252729	0.571429
0.252729	21.5027	0.252729	0.571429
0.252729	21.5027	0.252729	0.571429
0.252729	21.5027	0.252729	0.571429
0.252729	21.5027	0.252729	0.571429
0.252729	21.5027	0.252729	0.571429
0.252729	21.5027	0.252729	0.571429
0.252729	21.5027	0.252729	0.571429
0.252729	21.5027	0.252729	0.571429
0.252729	21.5027	0.252729	0.571429
0.252729	21.5027	0.252729	0.571429
0.253096	21.5027	0.253096	0.569892
0.253161	21.5027	0.253161	0.56962
0.253161	21.5027	0.253161	0.56962
0.253506	21.5027	0.253506	0.568182
0.253506	21.5027	0.253506	0.568182
0.253967	21.5027	0.253967	0.566265
0.253967	21.5027	0.253967	0.566265
0.253967	21.5027	0.253967	0.566265
0.253967	21.5027	0.253967	0.566265
0.253967	21.5027	0.253967	0.566265
0.253967	21.5027	0.253967	0.566265
0.253967	21.5027	0.253967	0.566265
0.253967	21.5027	0.253967	0.566265
0.253967	21.5027	0.253967	0.566265
0.253967	21.5027	0.253967	0.566265
0.253967	21.5027	0.253967	0.566265
0.253967	21.5027	0.253967	0.566265
0.253967	21.5027	0.253967	0.566265
0.253967	21.5027	0.253967	0.566265
0.254489	21.5027	0.254489	0.564103
0.254489	21.5027	0.254489	0.564103
0.254489	21.5027	0.254489	0.564103
0.254489	21.5027	0.254489	0.564103
0.254489	21.5027	0.254489	0.564103
0.254703	21.5027	0.254703	0.563218
0.254703	21.5027	0.254703	0.563218
0.254703	21.5027	0.254703	0.563218
0.254703	21.5027	0.254703	0.563218
0.255248	21.5027	0.255248	0.560976
0.255248	21.5027	0.255248	0.560976
0.255248	21.5027	0.255248	0.560976
0.255248	21.5027	0.255248	0.560976
0.255248	21.5027	0.255248	0.560976
0.255248	21.5027	0.255248	0.560976
0.255248	21.5027	0.255248	0.560976
0.255248	21.5027	0.255248	0.560976
0.255248	21.5027	0.255248	0.560976
0.255248	21.5027	0.255248	0.560976
0.255866	21.5027	0.255866	0.558442
0.255866	21.5027	0.255866	0.558442
0.25594	21.5027	0.25594	0.55814
0.25594	21.5027	0.25594	0.55814
0.25594	21.5027	0.25594	0.55814
0.25594	21.5027	0.25594	0.55814
0.256574	21.5027	0.256574	0.555556
0.256574	21.5027	0.256574	0.555556
0.256574	21.5027	0.256574	0.555556
0.256574	21.5027	0.256574	0.555556
0.256574	21.5027	0.256574	0.555556
0.256574	21.5027	0.256574	0.555556
0.256574	21.5027	0.256574	0.555556
0.256574	21.5027	0.256574	0.555556
0.256574	21.5027	0.256574	0.555556
0.256574	21.5027	0.256574	0.555556
0.257219	21.5027	0.257219	0.552941
0.257219	21.5027	0.257219	0.552941
0.257219	21.5027	0.257219	0.552941
0.257948	21.5027	0.257948	0.55
0.257948	21.5027	0.257948	0.55
0.257948	21.5027	0.257948	0.55
0.257948	21.5027	0.257948	0.55
0.257948	21.5027	0.257948	0.55
0.257948	21.5027	0.257948	0.55
0.257948	21.5027	0.257948	0.55
0.258541	21.5027	0.258541	0.547619
0.258541	21.5027	0.258541	0.547619
0.258541	21.5027	0.258541	0.547619
0.258541	21.5027	0.258541	0.547619
0.258541	21.5027	0.258541	0.547619
0.259372	21.5027	0.259372	0.544304
0.259372	21.5027	0.259372	0.544304
0.259372	21.5027	0.259372	0.544304
0.259372	21.5027	0.259372	0.544304
0.259372	21.5027	0.259372	0.544304
0.259372	21.5027	0.259372	0.544304
0.259372	21.5027	0.259372	0.544304
0.25991	21.5027	0.25991	0.542169
0.2604	21.5027	0.2604	0.54023
0.260849	21.5027	0.260849	0.538462
0.260849	21.5027	0.260849	0.538462
0.260849	21.5027	0.260849	0.538462
0.260849	21.5027	0.260849	0.538462
0.260849	21.5027	0.260849	0.538462
0.261327	21.5027	0.261327	0.536585
0.261327	21.5027	0.261327	0.536585
0.261327	21.5027	0.261327	0.536585
0.261327	21.5027	0.261327	0.536585
0.261327	21.5027	0.261327	0.536585
0.262159	21.5027	0.262159	0.533333
0.262382	21.5027	0.262382	0.532468
0.262382	21.5027	0.262382	0.532468
0.262382	21.5027	0.262382	0.532468
0.262382	21.5027	0.262382	0.532468
0.262795	21.5027	0.262795	0.530864
0.26317	21.5027	0.26317	0.529412
0.263512	21.5027	0.263512	0.52809
0.264317	21.5027	0.264317	0.525
0.264317	21.5027	0.264317	0.525
0.264317	21.5027	0.264317	0.525
0.264317	21.5027	0.264317	0.525
0.264317	21.5027	0.264317	0.525
0.264317	21.5027	0.264317	0.525
0.264317	21.5027	0.264317	0.525
0.264317	21.5027	0.264317	0.525
0.264317	21.5027	0.264317	0.525
0.264628	21.5027	0.264628	0.52381
0.264628	21.5027	0.264628	0.52381
0.264628	21.5027	0.264628	0.52381
0.265628	21.5027	0.265628	0.52
0.265628	21.5027	0.265628	0.52
0.265895	21.5027	0.265895	0.518987
0.265895	21.5027	0.265895	0.518987
0.265895	21.5027	0.265895	0.518987
0.265895	21.5027	0.265895	0.518987
0.266137	21.5027	0.266137	0.518072
0.267702	21.5027	0.267702	0.512195
0.267702	21.5027	0.267702	0.512195
0.267992	21.5027	0.267992	0.511111
0.269237	21.5027	0.269237	0.506494
0.269324	21.5027	0.269324	0.506173
0.269324	21.5027	0.269324	0.506173
0.271007	21.5027	0.271007	0.5
0.271007	21.5027	0.271007	0.5
0.271007	21.5027	0.271007	0.5
0.272594	21.5027	0.272594	0.494253
0.272671	21.5027	0.272671	0.493976
0.272755	21.5027	0.272755	0.493671
0.272849	21.5027	0.272849	0.493333
0.274396	21.5027	0.274396	0.487805
0.274396	21.5027	0.274396	0.487805
0.274767	21.5027	0.274767	0.486486
0.276461	21.5027	0.276461	0.480519
0.276461	21.5027	0.276461	0.480519
0.279533	21.5027	0.279533	0.46988
0.284082	21.5027	0.284082	0.454545
0.28998	21.9419	0.28998	0.617977
0.293518	21.9419	0.293518	0.604651
0.294773	21.9419	0.294773	0.6
0.294773	21.9419	0.294773	0.6
0.294773	21.9419	0.294773	0.6
0.295931	21.9419	0.295931	0.595745
0.295996	21.9419	0.295996	0.595506
0.295996	21.9419	0.295996	0.595506
0.297258	21.9419	0.297258	0.590909
0.297409	21.9419	0.297409	0.590361
0.298559	21.9419	0.298559	0.586207
0.298793	21.9419	0.298793	0.585366
0.298793	21.9419	0.298793	0.585366
0.299617	21.9419	0.299617	0.582418
0.299903	21.9419	0.299903	0.581395
0.299903	21.9419	0.299903	0.581395
0.300226	21.9419	0.300226	0.580247
0.300226	21.9419	0.300226	0.580247
0.300226	21.9419	0.300226	0.580247
0.300226	21.9419	0.300226	0.580247
0.301291	21.9419	0.301291	0.576471
0.301291	21.9419	0.301291	0.576471
0.301291	21.9419	0.301291	0.576471
0.301291	21.9419	0.301291	0.576471
0.301291	21.9419	0.301291	0.576471
0.301291	21.9419	0.301291	0.576471
0.301291	21.9419	0.301291	0.576471
0.301291	21.9419	0.301291	0.576471
0.301291	21.9419	0.301291	0.576471
0.301291	21.9419	0.301291	0.576471
0.301291	21.9419	0.301291	0.576471
0.301291	21.9419	0.301291	0.576471
0.301291	21.9419	0.301291	0.576471
0.301291	21.9419	0.301291	0.576471
0.301708	21.9419	0.301708	0.575
0.301708	21.9419	0.301708	0.575
0.301708	21.9419	0.301708	0.575
0.302267	21.9419	0.302267	0.573034
0.302726	21.9419	0.302726	0.571429
0.302726	21.9419	0.302726	0.571429
0.302726	21.9419	0.302726	0.571429
0.302726	21.9419	0.302726	0.571429
0.302726	21.9419	0.302726	0.571429
0.302726	21.9419	0.302726	0.571429
0.302726	21.9419	0.302726	0.571429
0.302726	21.9419	0.302726	0.571429
0.302726	21.9419	0.302726	0.571429
0.302726	21.9419	0.302726	0.571429
0.303243	21.9419	0.303243	0.56962
0.303656	21.9419	0.303656	0.568182
0.303656	21.9419	0.303656	0.568182
0.303656	21.9419	0.303656	0.568182
0.304209	21.9419	0.304209	0.566265
0.304209	21.9419	0.304209	0.566265
0.304209	21.9419	0.304209	0.566265
0.304209	21.9419	0.304209	0.566265
0.304209	21.9419	0.304209	0.566265
0.304834	21.9419	0.304834	0.564103
0.304834	21.9419	0.304834	0.564103
0.304834	21.9419	0.304834	0.564103
0.304834	21.9419	0.304834	0.564103
0.304834	21.9419	0.304834	0.564103
0.304834	21.9419	0.304834	0.564103
0.304834	21.9419	0.304834	0.564103
0.305091	21.9419	0.305091	0.563218
0.305091	21.9419	0.305091	0.563218
0.305743	21.9419	0.305743	0.560976
0.305743	21.9419	0.305743	0.560976
0.305743	21.9419	0.305743	0.560976
0.305743	21.9419	0.305743	0.560976
0.305743	21.9419	0.305743	0.560976
0.305743	21.9419	0.305743	0.560976
0.305743	21.9419	0.305743	0.560976
0.305743	21.9419	0.305743	0.560976
0.305743	21.9419	0.305743	0.560976
0.305743	21.9419	0.305743	0.560976
0.306484	21.9419	0.306484	0.558442
0.306484	21.9419	0.306484	0.558442
0.306484	21.9419	0.306484	0.558442
0.306573	21.9419	0.306573	0.55814
0.306573	21.9419	0.306573	0.55814
0.306573	21.9419	0.306573	0.55814
0.306573	21.9419	0.306573	0.55814
0.307332	21.9419	0.307332	0.555556
0.307332	21.9419	0.307332	0.555556
0.307332	21.9419	0.307332	0.555556
0.307332	21.9419	0.307332	0.555556
0.307332	21.9419	0.307332	0.555556
0.307332	21.9419	0.307332	0.555556
0.307332	21.9419	0.307332	0.555556
0.307332	21.9419	0.307332	0.555556
0.307332	21.9419	0.307332	0.555556
0.307332	21.9419	0.307332	0.555556
0.307332	21.9419	0.307332	0.555556
0.307332	21.9419	0.307332	0.555556
0.307332	21.9419	0.307332	0.555556
0.307332	21.9419	0.307332	0.555556
0.307332	21.9419	0.307332	0.555556
0.308104	21.9419	0.308104	0.552941
0.308104	21.9419	0.308104	0.552941
0.308104	21.9419	0.308104	0.552941
0.308196	21.9419	0.308196	0.552632
0.308196	21.9419	0.308196	0.552632
0.30881	21.9419	0.30881	0.550562
0.308977	21.9419	0.308977	0.55
0.308977	21.9419	0.308977	0.55
0.308977	21.9419	0.308977	0.55
0.308977	21.9419	0.308977	0.55
0.308977	21.9419	0.308977	0.55
0.308977	21.9419	0.308977	0.55
0.308977	21.9419	0.308977	0.55
0.308977	21.9419	0.308977	0.55
0.308977	21.9419	0.308977	0.55
0.308977	21.9419	0.308977	0.55
0.308977	21.9419	0.308977	0.55
0.308977	21.9419	0.308977	0.55
0.309688	21.9419	0.309688	0.547619
0.309688	21.9419	0.309688	0.547619
0.309688	21.9419	0.309688	0.547619
0.309973	21.9419	0.309973	0.546667
0.310337	21.9419	0.310337	0.545455
0.310337	21.9419	0.310337	0.545455
0.310337	21.9419	0.310337	0.545455
0.310683	21.9419	0.310683	0.544304
0.310683	21.9419	0.310683	0.544304
0.310683	21.9419	0.310683	0.544304
0.310683	21.9419	0.310683	0.544304
0.310683	21.9419	0.310683	0.544304
0.310683	21.9419	0.310683	0.544304
0.310683	21.9419	0.310683	0.544304
0.311327	21.9419	0.311327	0.542169
0.311327	21.9419	0.311327	0.542169
0.311327	21.9419	0.311327	0.542169
0.312452	21.9419	0.312452	0.538462
0.312452	21.9419	0.312452	0.538462
0.312452	21.9419	0.312452	0.538462
0.312452	21.9419	0.312452	0.538462
0.312452	21.9419	0.312452	0.538462
0.312452	21.9419	0.312452	0.538462
0.312452	21.9419	0.312452	0.538462
0.312452	21.9419	0.312452	0.538462
0.312452	21.9419	0.312452	0.538462
0.313024	21.9419	0.313024	0.536585
0.313024	21.9419	0.313024	0.536585
0.313024	21.9419	0.313024	0.536585
0.313024	21.9419	0.313024	0.536585
0.313024	21.9419	0.313024	0.536585
0.313024	21.9419	0.313024	0.536585
0.313024	21.9419	0.313024	0.536585
0.313545	21.9419	0.313545	0.534884
0.314021	21.9419	0.314021	0.533333
0.314288	21.9419	0.314288	0.532468
0.314288	21.9419	0.314288	0.532468
0.314288	21.9419	0.314288	0.532468
0.314783	21.9419	0.314783	0.530864
0.314783	21.9419	0.314783	0.530864
0.314783	21.9419	0.314783	0.530864
0.314783	21.9419	0.314783	0.530864
0.314783	21.9419	0.314783	0.530864
0.314783	21.9419	0.314783	0.530864
0.315232	21.9419	0.315232	0.529412
0.315232	21.9419	0.315232	0.529412
0.315232	21.9419	0.315232	0.529412
0.315643	21.9419	0.315643	0.52809
0.315643	21.9419	0.315643	0.52809
0.31574	21.9419	0.31574	0.527778
0.316195	21.9419	0.316195	0.526316
0.316195	21.9419	0.316195	0.526316
0.316195	21.9419	0.316195	0.526316
0.316606	21.9419	0.316606	0.525
0.316606	21.9419	0.316606	0.525
0.316606	21.9419	0.316606	0.525
0.316606	21.9419	0.316606	0.525
0.316606	21.9419	0.316606	0.525
0.316606	21.9419	0.316606	0.525
0.316606	21.9419	0.316606	0.525
0.316606	21.9419	0.316606	0.525
0.316606	21.9419	0.316606	0.525
0.316606	21.9419	0.316606	0.525
0.316978	21.9419	0.316978	0.52381
0.316978	21.9419	0.316978	0.52381
0.317318	21.9419	0.317318	0.522727
0.317318	21.9419	0.317318	0.522727
0.318177	21.9419	0.318177	0.52
0.318497	21.9419	0.318497	0.518987
0.318497	21.9419	0.318497	0.518987
0.318497	21.9419	0.318497	0.518987
0.318497	21.9419	0.318497	0.518987
0.318787	21.9419	0.318787	0.518072
0.318787	21.9419	0.318787	0.518072
0.320238	21.9419	0.320238	0.513514
0.32046	21.9419	0.32046	0.512821
0.320843	21.9419	0.320843	0.511628
0.3225	21.9419	0.3225	0.506494
0.3225	21.9419	0.3225	0.506494
0.322604	21.9419	0.322604	0.506173
0.322698	21.9419	0.322698	0.505882
0.322698	21.9419	0.322698	0.505882
0.322784	21.9419	0.322784	0.505618
0.32462	21.9419	0.32462	0.5
0.328679	21.9419	0.328679	0.487805
0.331152	21.9419	0.331152	0.480519
0.333051	21.9419	0.333051	0.475
0.333051	21.9419	0.333051	0.475
0.333507	21.9419	0.333507	0.473684
0.335366	21.9419	0.335366	0.468354
0.337775	21.9419	0.337775	0.461538
0.337775	21.9419	0.337775	0.461538
0.337775	21.9419	0.337775	0.461538
0.33878	22.3795	0.33878	0.614458
0.341902	22.3795	0.341902	0.604396
0.343284	22.3795	0.343284	0.6
0.346177	22.3795	0.346177	0.590909
0.346353	22.3795	0.346353	0.590361
0.347693	22.3795	0.347693	0.586207
0.347693	22.3795	0.347693	0.586207
0.347693	22.3795	0.347693	0.586207
0.347966	22.3795	0.347966	0.585366
0.348274	22.3795	0.348274	0.584416
0.349258	22.3795	0.349258	0.581395
0.349258	22.3795	0.349258	0.581395
0.349634	22.3795	0.349634	0.580247
0.349634	22.3795	0.349634	0.580247
0.350233	21.5027	0.350233	0.276596
0.350444	22.3795	0.350444	0.577778
0.350875	22.3795	0.350875	0.576471
0.350875	22.3795	0.350875	0.576471
0.350875	22.3795	0.350875	0.576471
0.35136	22.3795	0.35136	0.575
0.352545	22.3795	0.352545	0.571429
0.352545	22.3795	0.352545	0.571429
0.352545	22.3795	0.352545	0.571429
0.353148	22.3795	0.353148	0.56962
0.353148	22.3795	0.353148	0.56962
0.353148	22.3795	0.353148	0.56962
0.353148	22.3795	0.353148	0.56962
0.354273	22.3795	0.354273	0.566265
0.354273	22.3795	0.354273	0.566265
0.354273	22.3795	0.354273	0.566265
0.354273	22.3795	0.354273	0.566265
0.354273	22.3795	0.354273	0.566265
0.354273	22.3795	0.354273	0.566265
0.355001	22.3795	0.355001	0.564103
0.355001	22.3795	0.355001	0.564103
0.355001	22.3795	0.355001	0.564103
0.3553	22.3795	0.3553	0.563218
0.3553	22.3795	0.3553	0.563218
0.3553	22.3795	0.3553	0.563218
0.35606	22.3795	0.35606	0.560976
0.35606	22.3795	0.35606	0.560976
0.35606	22.3795	0.35606	0.560976
0.35606	22.3795	0.35606	0.560976
0.35606	22.3795	0.35606	0.560976
0.35606	22.3795	0.35606	0.560976
0.35606	22.3795	0.35606	0.560976
0.35606	22.3795	0.35606	0.560976
0.356242	22.3795	0.356242	0.56044
0.357025	22.3795	0.357025	0.55814
0.35791	22.3795	0.35791	0.555556
0.35791	22.3795	0.35791	0.555556
0.35791	22.3795	0.35791	0.555556
0.35791	22.3795	0.35791	0.555556
0.35791	22.3795	0.35791	0.555556
0.35791	22.3795	0.35791	0.555556
0.35791	22.3795	0.35791	0.555556
0.35791	22.3795	0.35791	0.555556
0.35791	22.3795	0.35791	0.555556
0.35791	22.3795	0.35791	0.555556
0.358809	22.3795	0.358809	0.552941
0.358809	22.3795	0.358809	0.552941
0.358916	22.3795	0.358916	0.552632
0.359631	22.3795	0.359631	0.550562
0.359826	22.3795	0.359826	0.55
0.359826	22.3795	0.359826	0.55
0.359826	22.3795	0.359826	0.55
0.359826	22.3795	0.359826	0.55
0.359826	22.3795	0.359826	0.55
0.360654	22.3795	0.360654	0.547619
0.360654	22.3795	0.360654	0.547619
0.360654	22.3795	0.360654	0.547619
0.360986	22.3795	0.360986	0.546667
0.361409	22.3795	0.361409	0.545455
0.361812	22.3795	0.361812	0.544304
0.361812	22.3795	0.361812	0.544304
0.361812	22.3795	0.361812	0.544304
0.361812	22.3795	0.361812	0.544304
0.361812	22.3795	0.361812	0.544304
0.361812	22.3795	0.361812	0.544304
0.361812	22.3795	0.361812	0.544304
0.361812	22.3795	0.361812	0.544304
0.361812	22.3795	0.361812	0.544304
0.362176	21.9419	0.362176	0.39759
0.362562	22.3795	0.362562	0.542169
0.363137	22.3795	0.363137	0.540541
0.363246	22.3795	0.363246	0.54023
0.363872	22.3795	0.363872	0.538462
0.363872	22.3795	0.363872	0.538462
0.363872	22.3795	0.363872	0.538462
0.363957	21.9419	0.363957	0.393258
0.364539	22.3795	0.364539	0.536585
0.364539	22.3795	0.364539	0.536585
0.364539	22.3795	0.364539	0.536585
0.364539	22.3795	0.364539	0.536585
0.364539	22.3795	0.364539	0.536585
0.365146	22.3795	0.365146	0.534884
0.3657	22.3795	0.3657	0.533333
0.366011	22.3795	0.366011	0.532468
0.366011	22.3795	0.366011	0.532468
0.366011	22.3795	0.366011	0.532468
0.366587	22.3795	0.366587	0.530864
0.366587	22.3795	0.366587	0.530864
0.366587	22.3795	0.366587	0.530864
0.366587	22.3795	0.366587	0.530864
0.366587	22.3795	0.366587	0.530864
0.366587	22.3795	0.366587	0.530864
0.366587	22.3795	0.366587	0.530864
0.366587	22.3795	0.366587	0.530864
0.36711	22.3795	0.36711	0.529412
0.368231	22.3795	0.368231	0.526316
0.368231	22.3795	0.368231	0.526316
0.36871	22.3795	0.36871	0.525
0.36871	22.3795	0.36871	0.525
0.36871	22.3795	0.36871	0.525
0.36871	22.3795	0.36871	0.525
0.369539	22.3795	0.369539	0.522727
0.370539	22.3795	0.370539	0.52
0.370912	22.3795	0.370912	0.518987
0.370912	22.3795	0.370912	0.518987
0.370912	22.3795	0.370912	0.518987
0.37125	22.3795	0.37125	0.518072
0.37125	22.3795	0.37125	0.518072
0.37294	22.3795	0.37294	0.513514
0.373198	22.3795	0.373198	0.512821
0.373198	22.3795	0.373198	0.512821
0.373198	22.3795	0.373198	0.512821
0.373432	22.3795	0.373432	0.512195
0.373432	22.3795	0.373432	0.512195
0.373837	22.3795	0.373837	0.511111
0.373837	22.3795	0.373837	0.511111
0.375574	22.3795	0.375574	0.506494
0.375695	22.3795	0.375695	0.506173
0.375695	22.3795	0.375695	0.506173
0.375695	22.3795	0.375695	0.506173
0.375805	22.3795	0.375805	0.505882
0.375905	22.3795	0.375905	0.505618
0.378043	22.3795	0.378043	0.5
0.378043	22.3795	0.378043	0.5
0.378043	22.3795	0.378043	0.5
0.380363	22.3795	0.380363	0.493976
0.380363	22.3795	0.380363	0.493976
0.380363	22.3795	0.380363	0.493976
0.380482	22.3795	0.380482	0.493671
0.380482	22.3795	0.380482	0.493671
0.380482	22.3795	0.380482	0.493671
0.38277	22.3795	0.38277	0.487805
0.383015	22.3795	0.383015	0.487179
0.383015	22.3795	0.383015	0.487179
0.383015	22.3795	0.383015	0.487179
0.383015	22.3795	0.383015	0.487179
0.383015	22.3795	0.383015	0.487179
0.385267	22.3795	0.385267	0.481481
0.38565	22.3795	0.38565	0.480519
0.38565	22.3795	0.38565	0.480519
0.38565	22.3795	0.38565	0.480519
0.387382	22.3795	0.387382	0.47619
0.388392	22.3795	0.388392	0.473684
0.390136	22.3795	0.390136	0.469388
0.390558	22.3795	0.390558	0.468354
0.393254	22.8157	0.393254	0.595506
0.39493	22.8157	0.39493	0.590909
0.39493	22.8157	0.39493	0.590909
0.39666	22.8157	0.39666	0.586207
0.39666	22.8157	0.39666	0.586207
0.39666	22.8157	0.39666	0.586207
0.39697	22.8157	0.39697	0.585366
0.39697	22.8157	0.39697	0.585366
0.398445	22.8157	0.398445	0.581395
0.398445	22.8157	0.398445	0.581395
0.398445	22.8157	0.398445	0.581395
0.399798	22.8157	0.399798	0.577778
0.400289	22.8157	0.400289	0.576471
0.400289	22.8157	0.400289	0.576471
0.400289	22.8157	0.400289	0.576471
0.401182	22.3795	0.401182	0.443038
0.402195	22.8157	0.402195	0.571429
0.402195	22.8157	0.402195	0.571429
0.402779	22.8157	0.402779	0.569892
0.40292	22.3795	0.40292	0.439024
0.404165	22.8157	0.404165	0.566265
0.404165	22.8157	0.404165	0.566265
0.404165	22.8157	0.404165	0.566265
0.404165	22.8157	0.404165	0.566265
0.404165	22.8157	0.404165	0.566265
0.404165	22.8157	0.404165	0.566265
0.404165	22.8157	0.404165	0.566265
0.404165	22.8157	0.404165	0.566265
0.405337	22.8157	0.405337	0.563218
0.405337	22.8157	0.405337	0.563218
0.406204	22.8157	0.406204	0.560976
0.406204	22.8157	0.406204	0.560976
0.406412	22.8157	0.406412	0.56044
0.407306	22.8157	0.407306	0.55814
0.407306	22.8157	0.407306	0.55814
0.407306	22.8157	0.407306	0.55814
0.407306	22.8157	0.407306	0.55814
0.408315	22.8157	0.408315	0.555556
0.408315	22.8157	0.408315	0.555556
0.408315	22.8157	0.408315	0.555556
0.409242	22.8157	0.409242	0.553191
0.409341	22.8157	0.409341	0.552941
0.409341	22.8157	0.409341	0.552941
0.409341	22.8157	0.409341	0.552941
0.410501	22.8157	0.410501	0.55
0.410501	22.8157	0.410501	0.55
0.410501	22.8157	0.410501	0.55
0.410501	22.8157	0.410501	0.55
0.410889	22.3795	0.410889	0.421053
0.411999	22.3795	0.411999	0.418605
0.412307	22.8157	0.412307	0.545455
0.412307	22.8157	0.412307	0.545455
0.412767	22.8157	0.412767	0.544304
0.412767	22.8157	0.412767	0.544304
0.412767	22.8157	0.412767	0.544304
0.412767	22.8157	0.412767	0.544304
0.412767	22.8157	0.412767	0.544304
0.412767	22.8157	0.412767	0.544304
0.412767	22.8157	0.412767	0.544304
0.413623	22.8157	0.413623	0.542169
0.413623	22.8157	0.413623	0.542169
0.413623	22.8157	0.413623	0.542169
0.413623	22.8157	0.413623	0.542169
0.414403	22.8157	0.414403	0.54023
0.415877	22.8157	0.415877	0.536585
0.415877	22.8157	0.415877	0.536585
0.415877	22.8157	0.415877	0.536585
0.415877	22.8157	0.415877	0.536585
0.41657	22.8157	0.41657	0.534884
0.41657	22.8157	0.41657	0.534884
0.41657	22.8157	0.41657	0.534884
0.41657	22.8157	0.41657	0.534884
0.417202	22.8157	0.417202	0.533333
0.417556	22.8157	0.417556	0.532468
0.417556	22.8157	0.417556	0.532468
0.417556	22.8157	0.417556	0.532468
0.418214	22.8157	0.418214	0.530864
0.418214	22.8157	0.418214	0.530864
0.418214	22.8157	0.418214	0.530864
0.418214	22.8157	0.418214	0.530864
0.418214	22.8157	0.418214	0.530864
0.418214	22.8157	0.418214	0.530864
0.418214	22.8157	0.418214	0.530864
0.418214	22.8157	0.418214	0.530864
0.418214	22.8157	0.418214	0.530864
0.41839	22.3795	0.41839	0.404762
0.419407	22.3795	0.419407	0.402597
0.42009	22.8157	0.42009	0.526316
0.420315	22.8157	0.420315	0.525773
0.420636	22.8157	0.420636	0.525
0.420636	22.8157	0.420636	0.525
0.420636	22.8157	0.420636	0.525
0.420738	22.8157	0.420738	0.524752
0.421131	22.8157	0.421131	0.52381
0.421131	22.8157	0.421131	0.52381
0.421131	22.8157	0.421131	0.52381
0.422723	22.8157	0.422723	0.52
0.422723	22.8157	0.422723	0.52
0.423148	22.8157	0.423148	0.518987
0.423148	22.8157	0.423148	0.518987
0.423533	22.8157	0.423533	0.518072
0.423833	21.9419	0.423833	0.268817
0.425309	22.3795	0.425309	0.390244
0.425462	22.8157	0.425462	0.513514
0.425462	22.8157	0.425462	0.513514
0.425757	22.8157	0.425757	0.512821
0.426023	22.8157	0.426023	0.512195
0.426265	22.8157	0.426265	0.511628
0.428466	22.8157	0.428466	0.506494
0.428605	22.8157	0.428605	0.506173
0.428605	22.8157	0.428605	0.506173
0.428605	22.8157	0.428605	0.506173
0.431284	22.8157	0.431284	0.5
0.431284	22.8157	0.431284	0.5
0.431284	22.8157	0.431284	0.5
0.431284	22.8157	0.431284	0.5
0.431284	22.8157	0.431284	0.5
0.431284	22.8157	0.431284	0.5
0.431284	22.8157	0.431284	0.5
0.431284	22.8157	0.431284	0.5
0.431284	22.8157	0.431284	0.5
0.431447	23.2503	0.431447	0.621053
0.432152	22.3795	0.432152	0.376344
0.432152	22.3795	0.432152	0.376344
0.433808	22.8157	0.433808	0.494253
0.43495	22.3795	0.43495	0.370787
0.43598	22.8157	0.43598	0.489362
0.436676	22.8157	0.436676	0.487805
0.436956	22.8157	0.436956	0.487179
0.436956	22.8157	0.436956	0.487179
0.438771	22.8157	0.438771	0.483146
0.439525	22.8157	0.439525	0.481481
0.439962	22.8157	0.439962	0.480519
0.439962	22.8157	0.439962	0.480519
0.441514	22.3795	0.441514	0.358025
0.441514	22.3795	0.441514	0.358025
0.441938	22.8157	0.441938	0.47619
0.441938	22.8157	0.441938	0.47619
0.442484	22.8157	0.442484	0.475
0.443505	23.2503	0.443505	0.590909
0.444851	22.8157	0.444851	0.46988
0.445137	23.2503	0.445137	0.586957
0.445448	23.2503	0.445448	0.586207
0.445448	23.2503	0.445448	0.586207
0.445561	22.8157	0.445561	0.468354
0.446349	22.8157	0.446349	0.466667
0.447229	22.8157	0.447229	0.464789
0.447875	22.8157	0.447875	0.463415
0.447934	23.2503	0.447934	0.580247
0.448369	22.8157	0.448369	0.462366
0.449523	23.2503	0.449523	0.576471
0.450635	22.3795	0.450635	0.340909
0.451017	22.8157	0.451017	0.45679
0.451663	23.2503	0.451663	0.571429
0.452091	22.8157	0.452091	0.454545
0.452091	22.8157	0.452091	0.454545
0.45232	23.2503	0.45232	0.569892
0.453052	23.2503	0.453052	0.568182
0.453052	23.2503	0.453052	0.568182
0.454283	22.8157	0.454283	0.45
0.456166	23.2503	0.456166	0.560976
0.456166	23.2503	0.456166	0.560976
0.456991	22.8157	0.456991	0.444444
0.457403	23.2503	0.457403	0.55814
0.457403	23.2503	0.457403	0.55814
0.457403	23.2503	0.457403	0.55814
0.457403	23.2503	0.457403	0.55814
0.458261	22.8157	0.458261	0.44186
0.458536	23.2503	0.458536	0.555556
0.458536	23.2503	0.458536	0.555556
0.459688	23.2503	0.459688	0.552941
0.459688	23.2503	0.459688	0.552941
0.460742	23.2503	0.460742	0.550562
0.460991	23.2503	0.460991	0.55
0.460991	23.2503	0.460991	0.55
0.460991	23.2503	0.460991	0.55
0.462052	23.2503	0.462052	0.547619
0.462052	23.2503	0.462052	0.547619
0.46302	23.2503	0.46302	0.545455
0.463536	23.2503	0.463536	0.544304
0.464497	23.2503	0.464497	0.542169
0.464497	23.2503	0.464497	0.542169
0.464497	23.2503	0.464497	0.542169
0.464497	23.2503	0.464497	0.542169
0.464497	23.2503	0.464497	0.542169
0.464497	23.2503	0.464497	0.542169
0.464497	23.2503	0.464497	0.542169
0.465373	23.2503	0.465373	0.54023
0.466175	23.2503	0.466175	0.538462
0.466727	22.8157	0.466727	0.425
0.467029	23.2503	0.467029	0.536585
0.467029	23.2503	0.467029	0.536585
0.467029	23.2503	0.467029	0.536585
0.467029	23.2503	0.467029	0.536585
0.467029	23.2503	0.467029	0.536585
0.467029	23.2503	0.467029	0.536585
0.467029	23.2503	0.467029	0.536585
0.467806	23.2503	0.467806	0.534884
0.467806	23.2503	0.467806	0.534884
0.467806	23.2503	0.467806	0.534884
0.467806	23.2503	0.467806	0.534884
0.468152	22.8157	0.468152	0.422222
0.468428	22.8157	0.468428	0.421687
0.468915	23.2503	0.468915	0.532468
0.468915	23.2503	0.468915	0.532468
0.468915	23.2503	0.468915	0.532468
0.469653	23.2503	0.469653	0.530864
0.469653	23.2503	0.469653	0.530864
0.469653	23.2503	0.469653	0.530864
0.469653	23.2503	0.469653	0.530864
0.470324	23.2503	0.470324	0.529412
0.47048	22.8157	0.47048	0.417722
0.470936	23.2503	0.470936	0.52809
0.470936	23.2503	0.470936	0.52809
0.470936	23.2503	0.470936	0.52809
0.472373	23.2503	0.472373	0.525
0.472373	23.2503	0.472373	0.525
0.472373	23.2503	0.472373	0.525
0.472373	23.2503	0.472373	0.525
0.472373	23.2503	0.472373	0.525
0.472929	23.2503	0.472929	0.52381
0.472929	23.2503	0.472929	0.52381
0.475194	23.2503	0.475194	0.518987
0.475194	23.2503	0.475194	0.518987
0.475194	23.2503	0.475194	0.518987
0.475627	23.2503	0.475627	0.518072
0.475627	23.2503	0.475627	0.518072
0.475627	23.2503	0.475627	0.518072
0.475902	22.8157	0.475902	0.407407
0.475902	22.8157	0.475902	0.407407
0.476335	22.8157	0.476335	0.406593
0.478123	23.2503	0.478123	0.512821
0.478123	23.2503	0.478123	0.512821
0.478123	23.2503	0.478123	0.512821
0.478123	23.2503	0.478123	0.512821
0.478423	23.2503	0.478423	0.512195
0.478473	22.8157	0.478473	0.402597
0.479873	22.8157	0.479873	0.4
0.479873	22.8157	0.479873	0.4
0.479873	22.8157	0.479873	0.4
0.481166	23.2503	0.481166	0.506494
0.481166	23.2503	0.481166	0.506494
0.481166	23.2503	0.481166	0.506494
0.481179	22.8157	0.481179	0.39759
0.481322	23.2503	0.481322	0.506173
0.481322	23.2503	0.481322	0.506173
0.481322	23.2503	0.481322	0.506173
0.481322	23.2503	0.481322	0.506173
0.481591	23.2503	0.481591	0.505618
0.48433	23.2503	0.48433	0.5
0.48433	23.2503	0.48433	0.5
0.48433	23.2503	0.48433	0.5
0.48433	23.2503	0.48433	0.5
0.48433	23.2503	0.48433	0.5
0.48433	23.2503	0.48433	0.5
0.486925	23.2503	0.486925	0.494737
0.487165	23.2503	0.487165	0.494253
0.487165	23.2503	0.487165	0.494253
0.487303	23.2503	0.487303	0.493976
0.487303	23.2503	0.487303	0.493976
0.487454	23.2503	0.487454	0.493671
0.487454	23.2503	0.487454	0.493671
0.487454	23.2503	0.487454	0.493671
0.487454	23.2503	0.487454	0.493671
0.487622	23.2503	0.487622	0.493333
0.488337	22.8157	0.488337	0.384615
0.490386	23.2503	0.490386	0.487805
0.490386	23.2503	0.490386	0.487805
0.4907	23.2503	0.4907	0.487179
0.4907	23.2503	0.4907	0.487179
0.491049	23.2503	0.491049	0.486486
0.491049	23.2503	0.491049	0.486486
0.491049	23.2503	0.491049	0.486486
0.492196	22.8157	0.492196	0.377778
0.493142	23.2503	0.493142	0.482353
0.493142	23.2503	0.493142	0.482353
0.493781	22.8157	0.493781	0.375
0.495738	23.2503	0.495738	0.477273
0.496909	23.2503	0.496909	0.475
0.498347	23.2503	0.498347	0.472222
0.499566	23.2503	0.499566	0.46988
0.499566	23.2503	0.499566	0.46988
0.500363	23.2503	0.500363	0.468354
0.502064	23.2503	0.502064	0.465116
0.502506	23.6834	0.502506	0.568182
0.50342	23.6834	0.50342	0.566265
0.503921	23.6834	0.503921	0.565217
0.504219	22.8157	0.504219	0.357143
0.504416	23.2503	0.504416	0.460674
0.50649	23.2503	0.50649	0.45679
0.50649	23.2503	0.50649	0.45679
0.507697	23.2503	0.507697	0.454545
0.508588	23.6834	0.508588	0.555556
0.508588	23.6834	0.508588	0.555556
0.50873	23.2503	0.50873	0.452632
0.50986	23.2503	0.50986	0.450549
0.509866	23.6834	0.509866	0.552941
0.509866	23.6834	0.509866	0.552941
0.509866	23.6834	0.509866	0.552941
0.509866	23.6834	0.509866	0.552941
0.510122	22.8157	0.510122	0.347368
0.510158	23.2503	0.510158	0.45
0.511098	23.2503	0.511098	0.448276
0.511311	23.6834	0.511311	0.55
0.511594	23.2503	0.511594	0.447368
0.512463	23.2503	0.512463	0.445783
0.512488	23.6834	0.512488	0.547619
0.512488	23.6834	0.512488	0.547619
0.512488	23.6834	0.512488	0.547619
0.513975	23.2503	0.513975	0.443038
0.51518	23.2503	0.51518	0.44086
0.5152	23.6834	0.5152	0.542169
0.5152	23.6834	0.5152	0.542169
0.517061	23.6834	0.517061	0.538462
0.517949	23.2503	0.517949	0.435897
0.518009	23.6834	0.518009	0.536585
0.518009	23.6834	0.518009	0.536585
0.520088	23.2503	0.520088	0.432099
0.520088	23.2503	0.520088	0.432099
0.520918	23.6834	0.520918	0.530864
0.520918	23.6834	0.520918	0.530864
0.521662	23.6834	0.521662	0.529412
0.52209	23.2503	0.52209	0.428571
0.522811	22.8157	0.522811	0.327103
0.522963	23.6834	0.522963	0.526882
0.523935	23.6834	0.523935	0.525
0.523969	23.2503	0.523969	0.425287
0.523969	23.2503	0.523969	0.425287
0.524552	23.6834	0.524552	0.52381
0.524552	23.6834	0.524552	0.52381
0.524552	23.6834	0.524552	0.52381
0.527065	23.6834	0.527065	0.518987
0.527544	23.6834	0.527544	0.518072
0.528347	23.2503	0.528347	0.417722
0.530155	23.2503	0.530155	0.414634
0.530314	23.6834	0.530314	0.512821
0.530314	23.6834	0.530314	0.512821
0.530947	23.6834	0.530947	0.511628
0.531473	23.6834	0.531473	0.510638
0.533861	23.6834	0.533861	0.506173
0.534289	23.6834	0.534289	0.505376
0.534436	23.2503	0.534436	0.407407
0.537198	23.6834	0.537198	0.5
0.537198	23.6834	0.537198	0.5
0.537504	23.2503	0.537504	0.402299
0.540342	23.6834	0.540342	0.494253
0.546117	23.6834	0.546117	0.483871
0.546972	23.6834	0.546972	0.482353
0.547463	23.6834	0.547463	0.481481
0.548008	23.6834	0.548008	0.480519
0.548008	23.6834	0.548008	0.480519
0.552735	23.2503	0.552735	0.377778
0.552735	23.2503	0.552735	0.377778
0.552793	24.115	0.552793	0.566265
0.553297	23.6834	0.553297	0.471264
0.554097	23.6834	0.554097	0.46988
0.557088	24.115	0.557088	0.55814
0.557236	23.2503	0.557236	0.370787
0.558468	24.115	0.558468	0.555556
0.559478	23.2503	0.559478	0.367347
0.559871	24.115	0.559871	0.552941
0.56057	23.6834	0.56057	0.458824
0.561777	23.6834	0.561777	0.45679
0.563115	23.6834	0.563115	0.454545
0.564328	23.2503	0.564328	0.36
0.565514	23.6834	0.565514	0.450549
0.565722	22.8157	0.565722	0.265306
0.565728	24.115	0.565728	0.542169
0.565728	24.115	0.565728	0.542169
0.566795	24.115	0.566795	0.54023
0.566795	24.115	0.566795	0.54023
0.566888	23.6834	0.566888	0.448276
0.567302	23.2503	0.567302	0.355556
0.56734	22.8157	0.56734	0.263158
0.567772	24.115	0.567772	0.538462
0.567778	23.6834	0.567778	0.446809
0.568402	23.6834	0.568402	0.445783
0.568812	24.115	0.568812	0.536585
0.569759	24.115	0.569759	0.534884
0.570078	23.6834	0.570078	0.443038
0.572548	23.6834	0.572548	0.439024
0.572548	23.6834	0.572548	0.439024
0.572548	23.6834	0.572548	0.439024
0.572824	24.115	0.572824	0.529412
0.572824	24.115	0.572824	0.529412
0.572824	24.115	0.572824	0.529412
0.57532	24.115	0.57532	0.525
0.575997	24.115	0.575997	0.52381
0.57665	23.6834	0.57665	0.432432
0.576859	23.6834	0.576859	0.432099
0.577331	23.2503	0.577331	0.340909
0.577697	24.115	0.577697	0.520833
0.57908	23.6834	0.57908	0.428571
0.57908	23.6834	0.57908	0.428571
0.57908	23.6834	0.57908	0.428571
0.579283	24.115	0.579283	0.518072
0.579283	24.115	0.579283	0.518072
0.5802	24.115	0.5802	0.516484
0.582052	22.3795	0.582052	0.153846
0.582688	24.115	0.582688	0.512195
0.582688	24.115	0.582688	0.512195
0.582688	24.115	0.582688	0.512195
0.583465	23.6834	0.583465	0.421687
0.585449	23.6834	0.585449	0.418605
0.58602	23.6834	0.58602	0.417722
0.586219	24.115	0.586219	0.506173
0.586219	24.115	0.586219	0.506173
0.586219	24.115	0.586219	0.506173
0.586219	24.115	0.586219	0.506173
0.586219	24.115	0.586219	0.506173
0.586391	24.115	0.586391	0.505882
0.586547	24.115	0.586547	0.505618
0.587312	23.6834	0.587312	0.41573
0.589883	24.115	0.589883	0.5
0.589883	24.115	0.589883	0.5
0.589883	24.115	0.589883	0.5
0.589883	24.115	0.589883	0.5
0.589902	23.6834	0.589902	0.411765
0.590892	23.6834	0.590892	0.410256
0.590892	23.6834	0.590892	0.410256
0.593183	24.115	0.593183	0.494505
0.593313	23.6834	0.593313	0.406593
0.593504	24.115	0.593504	0.493976
0.594531	23.6834	0.594531	0.404762
0.596176	23.6834	0.596176	0.402299
0.596916	23.2503	0.596916	0.313726
0.597258	24.115	0.597258	0.487805
0.59772	23.6834	0.59772	0.4
0.599677	24.115	0.599677	0.483871
0.600063	23.2503	0.600063	0.309524
0.600615	24.115	0.600615	0.482353
0.600727	23.2503	0.600727	0.308642
0.600869	23.6834	0.600869	0.395349
0.601156	24.115	0.601156	0.481481
0.60316	24.115	0.60316	0.478261
0.605203	24.115	0.605203	0.475
0.605749	23.6834	0.605749	0.388235
0.606762	24.115	0.606762	0.472527
0.607561	24.115	0.607561	0.471264
0.609582	24.115	0.609582	0.468085
0.610488	24.115	0.610488	0.466667
0.610488	24.115	0.610488	0.466667
0.611482	24.115	0.611482	0.465116
0.612576	24.115	0.612576	0.463415
0.612576	24.115	0.612576	0.463415
0.612576	24.115	0.612576	0.463415
0.613069	23.6834	0.613069	0.377778
0.613252	24.115	0.613252	0.462366
0.613564	24.5451	0.613564	0.546392
0.613787	24.115	0.613787	0.461538
0.613888	23.6834	0.613888	0.376623
0.615866	24.115	0.615866	0.458333
0.616873	24.115	0.616873	0.45679
0.617048	24.115	0.617048	0.456522
0.618343	24.115	0.618343	0.454545
0.618343	24.115	0.618343	0.454545
0.618343	24.115	0.618343	0.454545
0.619588	23.2503	0.619588	0.284404
0.61977	23.6834	0.61977	0.368421
0.620737	23.6834	0.620737	0.367089
0.621412	24.5451	0.621412	0.533333
0.623809	24.5451	0.623809	0.529412
0.624147	24.115	0.624147	0.445783
0.624147	24.115	0.624147	0.445783
0.625928	23.6834	0.625928	0.36
0.626135	22.8157	0.626135	0.192661
0.626686	23.6834	0.626686	0.358974
0.628045	23.6834	0.628045	0.357143
0.629227	23.6834	0.629227	0.355556
0.630739	23.6834	0.630739	0.353535
0.631241	24.115	0.631241	0.435294
0.631591	24.115	0.631591	0.434783
0.63238	23.6834	0.63238	0.351351
0.633434	24.115	0.633434	0.432099
0.633627	24.115	0.633627	0.431818
0.633627	24.115	0.633627	0.431818
0.634678	23.6834	0.634678	0.348315
0.635873	24.115	0.635873	0.428571
0.635873	24.115	0.635873	0.428571
0.638396	24.5451	0.638396	0.506173
0.638583	24.5451	0.638583	0.505882
0.638583	24.5451	0.638583	0.505882
0.64031	24.115	0.64031	0.422222
0.640725	23.6834	0.640725	0.340426
0.642386	24.5451	0.642386	0.5
0.642386	24.5451	0.642386	0.5
0.642386	24.5451	0.642386	0.5
0.645559	24.5451	0.645559	0.495146
0.645696	24.115	0.645696	0.414634
0.645828	24.5451	0.645828	0.494737
0.646329	24.5451	0.646329	0.493976
0.646329	24.5451	0.646329	0.493976
0.646329	24.5451	0.646329	0.493976
0.65004	24.5451	0.65004	0.488372
0.65321	24.115	0.65321	0.404255
0.653408	23.2503	0.653408	0.244444
0.654073	24.5451	0.654073	0.482353
0.654662	24.5451	0.654662	0.481481
0.656229	24.5451	0.656229	0.479167
0.656341	24.115	0.656341	0.4
0.657935	24.115	0.657935	0.397849
0.658256	24.5451	0.658256	0.47619
0.65907	24.5451	0.65907	0.475
0.65907	24.5451	0.65907	0.475
0.660018	23.2503	0.660018	0.237113
0.661364	24.115	0.661364	0.393258
0.662006	24.115	0.662006	0.392405
0.662594	24.5451	0.662594	0.46988
0.663838	24.5451	0.663838	0.468085
0.665158	24.115	0.665158	0.388235
0.667099	24.5451	0.667099	0.463415
0.667099	24.5451	0.667099	0.463415
0.667099	24.5451	0.667099	0.463415
0.669376	24.115	0.669376	0.382716
0.670682	24.5451	0.670682	0.458333
0.670735	24.115	0.670735	0.380952
0.672032	24.9738	0.672032	0.533333
0.673378	24.5451	0.673378	0.454545
0.674494	23.6834	0.674494	0.298969
0.674929	24.5451	0.674929	0.452381
0.675237	23.2503	0.675237	0.220779
0.67789	24.5451	0.67789	0.448276
0.678672	22.8157	0.678672	0.14
0.678678	24.115	0.678678	0.370787
0.678678	24.115	0.678678	0.370787
0.678678	24.115	0.678678	0.370787
0.679874	24.5451	0.679874	0.445545
0.680676	24.5451	0.680676	0.444444
0.681705	24.5451	0.681705	0.443038
0.682568	24.5451	0.682568	0.44186
0.684323	23.6834	0.684323	0.287671
0.684379	24.115	0.684379	0.363636
0.684658	24.5451	0.684658	0.439024
0.685183	24.115	0.685183	0.362637
0.686976	24.5451	0.686976	0.435897
0.687425	24.5451	0.687425	0.435294
0.690311	24.115	0.690311	0.356322
0.690311	24.115	0.690311	0.356322
0.690784	24.9738	0.690784	0.505618
0.692469	24.5451	0.692469	0.428571
0.694241	23.6834	0.694241	0.276596
0.698436	24.9738	0.698436	0.494737
0.69878	24.9738	0.69878	0.494253
0.702313	24.5451	0.702313	0.41573
0.702682	24.115	0.702682	0.341463
0.705409	24.5451	0.705409	0.411765
0.709642	24.115	0.709642	0.333333
0.71035	24.9738	0.71035	0.478261
0.712913	24.5451	0.712913	0.402299
0.714759	24.5451	0.714759	0.4
0.716176	24.115	0.716176	0.325843
0.716176	24.115	0.716176	0.325843
0.716568	24.9738	0.716568	0.46988
0.716705	24.5451	0.716705	0.39759
0.718524	24.5451	0.718524	0.395349
0.719274	23.6834	0.719274	0.25
0.72023	24.5451	0.72023	0.393258
0.722118	24.115	0.722118	0.319149
0.722118	24.115	0.722118	0.319149
0.722537	24.115	0.722537	0.318681
0.727367	24.5451	0.727367	0.384615
0.731818	24.5451	0.731818	0.37931
0.732521	24.115	0.732521	0.307692
0.733114	24.5451	0.733114	0.377778
0.735474	24.5451	0.735474	0.375
0.736553	24.5451	0.736553	0.373737
0.740429	24.9738	0.740429	0.439024
0.746287	23.6834	0.746287	0.223301
0.748876	24.9738	0.748876	0.428571
0.748877	24.115	0.748877	0.290323
0.75157	24.9738	0.75157	0.425287
0.757415	24.115	0.757415	0.281553
0.758948	24.115	0.758948	0.28
0.759397	24.5451	0.759397	0.347826
0.76494	24.5451	0.76494	0.341772
0.765146	24.9738	0.765146	0.409091
0.767036	23.2503	0.767036	0.136
0.772803	24.5451	0.772803	0.333333
0.772982	24.9738	0.772982	0.4
0.772982	24.9738	0.772982	0.4
0.775086	24.9738	0.775086	0.39759
0.778898	24.9738	0.778898	0.393258
0.780894	24.115	0.780894	0.258427
0.782259	24.9738	0.782259	0.389474
0.785869	25.401	0.785869	0.45098
0.786391	24.5451	0.786391	0.319149
0.787121	24.115	0.787121	0.252525
0.788567	23.6834	0.788567	0.185185
0.789934	24.9738	0.789934	0.380952
0.791377	23.6834	0.791377	0.182796
0.794301	23.6834	0.794301	0.180328
0.803909	24.9738	0.803909	0.365854
0.808896	24.5451	0.808896	0.296703
0.812897	23.6834	0.812897	0.165049
0.8166	24.115	0.8166	0.225806
0.822528	24.9738	0.822528	0.346535
0.824829	24.5451	0.824829	0.281553
0.827846	24.9738	0.827846	0.341176
0.831007	25.401	0.831007	0.4
0.837367	25.401	0.837367	0.393258
0.837556	23.6834	0.837556	0.145833
0.838717	24.5451	0.838717	0.268817
0.841791	24.5451	0.841791	0.266055
0.842529	24.9738	0.842529	0.326733
0.843198	24.9738	0.843198	0.326087
0.845664	25.401	0.845664	0.384615
0.847623	24.5451	0.847623	0.26087
0.848053	24.9738	0.848053	0.321429
0.851403	25.8268	0.851403	0.439024
0.856616	24.5451	0.856616	0.253012
0.857179	24.5451	0.857179	0.252525
0.864407	24.9738	0.864407	0.306122
0.866039	23.6834	0.866039	0.125
0.866343	24.9738	0.866343	0.304348
0.866641	24.5451	0.866641	0.244444
0.874788	24.9738	0.874788	0.296703
0.874788	24.9738	0.874788	0.296703
0.879017	24.9738	0.879017	0.292929
0.879618	24.5451	0.879618	0.233645
0.881963	24.9738	0.881963	0.290323
0.882904	25.401	0.882904	0.347826
0.887458	24.5451	0.887458	0.227273
0.893823	24.9738	0.893823	0.28
0.895012	24.5451	0.895012	0.221239
0.898588	24.115	0.898588	0.160714
0.901043	24.5451	0.901043	0.216495
0.904394	24.9738	0.904394	0.271028
0.90819	24.9738	0.90819	0.267857
0.91161	24.5451	0.91161	0.208333
0.916923	24.5451	0.916923	0.204301
0.919699	24.115	0.919699	0.145833
0.922658	24.5451	0.922658	0.2
0.923517	24.9738	0.923517	0.255319
0.923517	24.9738	0.923517	0.255319
0.926725	24.9738	0.926725	0.252747
0.932172	24.5451	0.932172	0.192982
0.93358	24.9738	0.93358	0.247312
0.93358	24.9738	0.93358	0.247312
0.935087	25.401	0.935087	0.301205
0.940942	25.401	0.940942	0.296296
0.940942	25.401	0.940942	0.296296
0.942975	24.5451	0.942975	0.185185
0.948233	24.9738	0.948233	0.235955
0.9491	24.9738	0.9491	0.235294
0.9491	24.9738	0.9491	0.235294
0.951797	25.401	0.951797	0.287356
0.955078	24.9738	0.955078	0.230769
0.957154	25.401	0.957154	0.283019
0.95868	24.9738	0.95868	0.22807
0.959145	24.9738	0.959145	0.227723
0.959188	26.2512	0.959188	0.388235
0.9635	24.9738	0.9635	0.22449
0.967567	25.401	0.967567	0.274725
0.969665	24.5451	0.969665	0.166667
0.97444	24.9738	0.97444	0.216495
0.97705	25.401	0.97705	0.267327
0.97848	25.8268	0.97848	0.318681
0.979629	24.9738	0.979629	0.212766
0.983814	25.401	0.983814	0.262136
0.98596	25.401	0.98596	0.260504
0.98989	24.115	0.98989	0.100917
0.990177	26.2512	0.990177	0.360825
0.99337	22.8157	0.99337	-0.058824
0.997816	24.9738	0.997816	0.2
1.00759	25.401	1.00759	0.244444
1.01421	24.5451	1.01421	0.137931
1.01496	25.401	1.01496	0.23913
1.01533	26.2512	1.01533	0.339806
1.02034	25.401	1.02034	0.235294
1.02422	25.401	1.02422	0.232558
1.02771	24.9738	1.02771	0.18
1.03291	25.8268	1.03291	0.27619
1.03309	26.2512	1.03309	0.325581
1.03391	25.401	1.03391	0.225806
1.03756	25.401	1.03756	0.223301
1.03913	25.401	1.03913	0.222222
1.04133	26.2512	1.04133	0.319149
1.04596	25.8268	1.04596	0.266667
1.05413	24.9738	1.05413	0.163265
1.05501	25.401	1.05501	0.211538
1.05654	25.401	1.05654	0.210526
1.05734	24.9738	1.05734	0.16129
1.0605	25.401	1.0605	0.207921
1.0605	25.401	1.0605	0.207921
1.06639	25.401	1.06639	0.204082
1.06959	25.8268	1.06959	0.25
1.08495	23.2503	1.08495	-0.046729
1.09585	25.8268	1.09585	0.232323
1.09585	25.8268	1.09585	0.232323
1.09822	25.8268	1.09822	0.230769
1.1029	25.8268	1.1029	0.227723
1.10885	24.9738	1.10885	0.131148
1.11644	25.8268	1.11644	0.219048
1.11751	26.2512	1.11751	0.264151
1.12558	24.9738	1.12558	0.121951
1.1343	25.8268	1.1343	0.207921
1.13564	25.401	1.13564	0.161905
1.14737	25.8268	1.14737	0.2
1.15336	25.8268	1.15336	0.196429
1.15395	25.8268	1.15395	0.196078
1.15424	26.6741	1.15424	0.284404
1.16175	25.8268	1.16175	0.191489
1.16257	25.8268	1.16257	0.191011
1.16603	26.6741	1.16603	0.276596
1.16754	25.8268	1.16754	0.188119
1.17383	27.0957	1.17383	0.314815
1.17466	22.8157	1.17466	-0.125
1.17489	26.6741	1.17489	0.270833
1.17516	26.2512	1.17516	0.227273
1.17527	25.8268	1.17527	0.183673
1.17717	24.9738	1.17717	0.095238
1.17975	26.2512	1.17975	0.22449
1.18658	25.401	1.18658	0.134021
1.19577	26.2512	1.19577	0.214953
1.20068	26.6741	1.20068	0.254545
1.20161	26.2512	1.20161	0.211538
1.20635	26.2512	1.20635	0.208791
1.2091	26.2512	1.2091	0.207207
1.21088	25.8268	1.21088	0.163934
1.21184	26.6741	1.21184	0.247706
1.21327	26.2512	1.21327	0.204819
1.21396	25.401	1.21396	0.12
1.21466	25.8268	1.21466	0.161905
1.21523	26.2512	1.21523	0.203704
1.21523	26.2512	1.21523	0.203704
1.22177	26.2512	1.22177	0.2
1.22468	26.6741	1.22468	0.24
1.22468	26.6741	1.22468	0.24
1.22789	26.6741	1.22789	0.238095
1.23032	27.5159	1.23032	0.319149
1.23153	26.6741	1.23153	0.235955
1.23495	26.2512	1.23495	0.192661
1.23881	27.0957	1.23881	0.272727
1.24043	26.2512	1.24043	0.189655
1.24648	26.6741	1.24648	0.227273
1.24867	26.2512	1.24867	0.185185
1.25294	27.0957	1.25294	0.264151
1.25347	26.2512	1.25347	0.182609
1.25496	26.2512	1.25496	0.181818
1.26702	26.6741	1.26702	0.215686
1.26955	26.6741	1.26955	0.214286
1.27524	26.2512	1.27524	0.171171
1.27788	26.2512	1.27788	0.169811
1.27788	26.2512	1.27788	0.169811
1.27788	26.2512	1.27788	0.169811
1.28041	26.6741	1.28041	0.208333
1.28248	26.6741	1.28248	0.207207
1.28248	26.6741	1.28248	0.207207
1.2872	26.2512	1.2872	0.165049
1.29343	26.2512	1.29343	0.161905
1.29581	26.2512	1.29581	0.160714
1.29592	26.6741	1.29592	0.2
1.30355	26.2512	1.30355	0.156863
1.30698	26.2512	1.30698	0.155172
1.30991	26.6741	1.30991	0.192661
1.31116	27.0957	1.31116	0.230769
1.31378	25.8268	1.31378	0.112903
1.31446	26.2512	1.31446	0.151515
1.31675	27.0957	1.31675	0.227723
1.31762	26.6741	1.31762	0.188679
1.31871	26.6741	1.31871	0.188119
1.32126	26.6741	1.32126	0.186813
1.32142	26.2512	1.32142	0.148148
1.32446	26.6741	1.32446	0.185185
1.33112	26.6741	1.33112	0.181818
1.33112	27.0957	1.33112	0.22
1.33685	26.6741	1.33685	0.178947
1.33761	26.6741	1.33761	0.178571
1.35151	26.6741	1.35151	0.171717
1.35852	26.6741	1.35852	0.168317
1.36577	26.6741	1.36577	0.164835
1.36757	25.8268	1.36757	0.089286
1.36906	26.6741	1.36906	0.163265
1.37393	25.8268	1.37393	0.086614
1.37668	26.6741	1.37668	0.159664
1.37709	26.2512	1.37709	0.122449
1.38046	26.6741	1.38046	0.157895
1.38917	26.6741	1.38917	0.153846
1.38917	26.6741	1.38917	0.153846
1.39011	27.5159	1.39011	0.226415
1.39076	27.0957	1.39076	0.189655
1.392	26.6741	1.392	0.152542
1.3928	26.6741	1.3928	0.152174
1.39318	26.6741	1.39318	0.152
1.39658	26.6741	1.39658	0.150442
1.39781	26.2512	1.39781	0.113402
1.40162	26.6741	1.40162	0.148148
1.40758	26.6741	1.40758	0.145455
1.4131	27.0957	1.4131	0.178947
1.41335	26.2512	1.41335	0.106796
1.41338	26.6741	1.41338	0.142857
1.41338	26.6741	1.41338	0.142857
1.41939	26.6741	1.41939	0.140187
1.42451	26.6741	1.42451	0.137931
1.42784	27.5159	1.42784	0.207547
1.42978	27.0957	1.42978	0.171171
1.43274	27.0957	1.43274	0.169811
1.43346	27.5159	1.43346	0.204819
1.44566	27.0957	1.44566	0.163934
1.4482	27.0957	1.4482	0.162791
1.45222	27.5159	1.45222	0.195876
1.4552	27.0957	1.4552	0.159664
1.46574	25.401	1.46574	0.015625
1.47225	26.6741	1.47225	0.117647
1.47623	27.0957	1.47623	0.150442
1.4807	27.0957	1.4807	0.148515
1.48156	27.0957	1.48156	0.148148
1.48745	27.0957	1.48745	0.145631
1.49399	27.0957	1.49399	0.142857
1.49751	26.6741	1.49751	0.107438
1.49825	26.6741	1.49825	0.107143
1.49953	27.5159	1.49953	0.174312
1.49996	27.0957	1.49996	0.140351
1.49996	27.0957	1.49996	0.140351
1.50035	27.0957	1.50035	0.140187
1.50035	27.0957	1.50035	0.140187
1.50048	27.9348	1.50048	0.207547
1.50079	27.0957	1.50079	0.14
1.50576	27.0957	1.50576	0.137931
1.50652	27.0957	1.50652	0.137615
1.50843	27.9348	1.50843	0.203883
1.50927	26.6741	1.50927	0.102804
1.50942	26.2512	1.50942	0.068965
1.51042	27.0957	1.51042	0.136
1.51324	27.5159	1.51324	0.168317
1.52954	27.0957	1.52954	0.128205
1.53186	27.0957	1.53186	0.127273
1.53207	26.6741	1.53207	0.094017
1.54054	27.0957	1.54054	0.12381
1.54228	27.5159	1.54228	0.155963
1.54738	27.5159	1.54738	0.153846
1.54905	27.5159	1.54905	0.153153
1.55053	27.5159	1.55053	0.152542
1.55622	27.0957	1.55622	0.117647
1.55875	27.0957	1.55875	0.116667
1.56074	26.6741	1.56074	0.083333
1.56448	26.6741	1.56448	0.081967
1.56883	27.0957	1.56883	0.112782
1.57321	27.0957	1.57321	0.111111
1.58104	27.5159	1.58104	0.140187
1.58232	25.8268	1.58232	0.010989
1.58798	21.9419	1.58798	-0.285714
1.60471	27.9348	1.60471	0.162393
1.61425	27.5159	1.61425	0.127273
1.62386	27.0957	1.62386	0.092437
1.62815	27.0957	1.62815	0.090909
1.63555	27.5159	1.63555	0.119266
1.65782	27.5159	1.65782	0.111111
1.65782	27.5159	1.65782	0.111111
1.67102	27.5159	1.67102	0.106383
1.6993	27.9348	1.6993	0.126214
1.69936	27.0957	1.69936	0.066667
1.70297	27.5159	1.70297	0.095238
1.72978	27.5159	1.72978	0.086207
1.73552	27.0957	1.73552	0.055118
1.74761	27.9348	1.74761	0.109244
1.77977	28.7684	1.77977	0.15493
1.79124	28.3523	1.79124	0.122807
1.79533	27.0957	1.79533	0.037037
1.83011	28.7684	1.83011	0.137255
1.90414	28.3523	1.90414	0.086614
1.91035	28.3523	1.91035	0.084746
1.97267	28.3523	1.97267	0.066667
1.99357	29.1833	1.99357	0.111111
2.11122	28.7684	2.11122	0.054054
2.11157	27.5159	2.11157	-0.017544

## Sheet: ECI_NDVI2009
ECI2009	NDVI2009	ECI2009	LST2009
0.083643	0.54	0.083643	27.0957
0.083643	0.54	0.083643	27.0957
0.084223	0.533981	0.084223	27.0957
0.084223	0.533981	0.084223	27.0957
0.085603	0.52	0.085603	27.0957
0.085603	0.52	0.085603	27.0957
0.086028	0.515789	0.086028	27.0957
0.086093	0.515152	0.086093	27.0957
0.086553	0.510638	0.086553	27.0957
0.08714	0.504951	0.08714	27.0957
0.087658	0.5	0.087658	27.0957
0.087658	0.5	0.087658	27.0957
0.087658	0.5	0.087658	27.0957
0.087658	0.5	0.087658	27.0957
0.08824	0.494505	0.08824	27.0957
0.088791	0.489362	0.088791	27.0957
0.088842	0.488889	0.088842	27.0957
0.089388	0.483871	0.089388	27.0957
0.091999	0.460674	0.091999	27.0957
0.106994	0.349398	0.106994	27.0957
0.123071	0.555556	0.123071	27.5159
0.123371	0.553398	0.123371	27.5159
0.123702	0.55102	0.123702	27.5159
0.123983	0.54902	0.123983	27.5159
0.124243	0.54717	0.124243	27.5159
0.124614	0.544554	0.124614	27.5159
0.125263	0.54	0.125263	27.5159
0.125718	0.536842	0.125718	27.5159
0.125718	0.536842	0.125718	27.5159
0.125718	0.536842	0.125718	27.5159
0.125718	0.536842	0.125718	27.5159
0.125718	0.536842	0.125718	27.5159
0.125933	0.535354	0.125933	27.5159
0.125933	0.535354	0.125933	27.5159
0.126111	0.245902	0.126111	27.0957
0.126133	0.533981	0.126133	27.5159
0.126434	0.531915	0.126434	27.5159
0.126625	0.530612	0.126625	27.5159
0.126801	0.529412	0.126801	27.5159
0.127174	0.526882	0.127174	27.5159
0.127174	0.526882	0.127174	27.5159
0.127174	0.526882	0.127174	27.5159
0.127174	0.526882	0.127174	27.5159
0.127174	0.526882	0.127174	27.5159
0.127174	0.526882	0.127174	27.5159
0.127338	0.525773	0.127338	27.5159
0.127338	0.525773	0.127338	27.5159
0.127338	0.525773	0.127338	27.5159
0.127338	0.525773	0.127338	27.5159
0.127489	0.524752	0.127489	27.5159
0.127489	0.524752	0.127489	27.5159
0.127938	0.521739	0.127938	27.5159
0.127938	0.521739	0.127938	27.5159
0.127938	0.521739	0.127938	27.5159
0.127938	0.521739	0.127938	27.5159
0.127938	0.521739	0.127938	27.5159
0.128074	0.520833	0.128074	27.5159
0.128074	0.520833	0.128074	27.5159
0.128074	0.520833	0.128074	27.5159
0.128074	0.520833	0.128074	27.5159
0.128074	0.520833	0.128074	27.5159
0.128074	0.520833	0.128074	27.5159
0.128074	0.520833	0.128074	27.5159
0.128074	0.520833	0.128074	27.5159
0.128074	0.520833	0.128074	27.5159
0.128074	0.520833	0.128074	27.5159
0.128199	0.52	0.128199	27.5159
0.128199	0.52	0.128199	27.5159
0.128199	0.52	0.128199	27.5159
0.128199	0.52	0.128199	27.5159
0.128199	0.52	0.128199	27.5159
0.128199	0.52	0.128199	27.5159
0.128615	0.517241	0.128615	27.5159
0.12873	0.516484	0.12873	27.5159
0.12873	0.516484	0.12873	27.5159
0.12873	0.516484	0.12873	27.5159
0.12873	0.516484	0.12873	27.5159
0.128835	0.515789	0.128835	27.5159
0.128835	0.515789	0.128835	27.5159
0.128835	0.515789	0.128835	27.5159
0.128835	0.515789	0.128835	27.5159
0.128835	0.515789	0.128835	27.5159
0.128835	0.515789	0.128835	27.5159
0.128835	0.515789	0.128835	27.5159
0.128835	0.515789	0.128835	27.5159
0.128835	0.515789	0.128835	27.5159
0.128835	0.515789	0.128835	27.5159
0.128835	0.515789	0.128835	27.5159
0.128835	0.515789	0.128835	27.5159
0.128835	0.515789	0.128835	27.5159
0.128835	0.515789	0.128835	27.5159
0.128835	0.515789	0.128835	27.5159
0.128835	0.515789	0.128835	27.5159
0.128835	0.515789	0.128835	27.5159
0.128835	0.515789	0.128835	27.5159
0.128835	0.515789	0.128835	27.5159
0.128835	0.515789	0.128835	27.5159
0.128835	0.515789	0.128835	27.5159
0.128835	0.515789	0.128835	27.5159
0.128932	0.515152	0.128932	27.5159
0.128932	0.515152	0.128932	27.5159
0.129469	0.511628	0.129469	27.5159
0.129549	0.511111	0.129549	27.5159
0.129549	0.511111	0.129549	27.5159
0.129549	0.511111	0.129549	27.5159
0.129549	0.511111	0.129549	27.5159
0.129549	0.511111	0.129549	27.5159
0.129621	0.510638	0.129621	27.5159
0.129621	0.510638	0.129621	27.5159
0.129621	0.510638	0.129621	27.5159
0.129621	0.510638	0.129621	27.5159
0.129621	0.510638	0.129621	27.5159
0.129621	0.510638	0.129621	27.5159
0.129621	0.510638	0.129621	27.5159
0.129621	0.510638	0.129621	27.5159
0.129621	0.510638	0.129621	27.5159
0.129621	0.510638	0.129621	27.5159
0.129621	0.510638	0.129621	27.5159
0.129621	0.510638	0.129621	27.5159
0.129621	0.510638	0.129621	27.5159
0.129621	0.510638	0.129621	27.5159
0.129621	0.510638	0.129621	27.5159
0.129621	0.510638	0.129621	27.5159
0.129621	0.510638	0.129621	27.5159
0.129621	0.510638	0.129621	27.5159
0.129621	0.510638	0.129621	27.5159
0.129621	0.510638	0.129621	27.5159
0.129688	0.510204	0.129688	27.5159
0.129688	0.510204	0.129688	27.5159
0.129688	0.510204	0.129688	27.5159
0.129688	0.510204	0.129688	27.5159
0.129688	0.510204	0.129688	27.5159
0.129688	0.510204	0.129688	27.5159
0.129688	0.510204	0.129688	27.5159
0.129688	0.510204	0.129688	27.5159
0.129688	0.510204	0.129688	27.5159
0.12975	0.509804	0.12975	27.5159
0.130397	0.505618	0.130397	27.5159
0.130397	0.505618	0.130397	27.5159
0.130397	0.505618	0.130397	27.5159
0.130397	0.505618	0.130397	27.5159
0.130397	0.505618	0.130397	27.5159
0.130397	0.505618	0.130397	27.5159
0.130397	0.505618	0.130397	27.5159
0.130435	0.505376	0.130435	27.5159
0.130435	0.505376	0.130435	27.5159
0.130435	0.505376	0.130435	27.5159
0.130435	0.505376	0.130435	27.5159
0.130435	0.505376	0.130435	27.5159
0.130435	0.505376	0.130435	27.5159
0.130435	0.505376	0.130435	27.5159
0.130435	0.505376	0.130435	27.5159
0.130435	0.505376	0.130435	27.5159
0.130435	0.505376	0.130435	27.5159
0.130435	0.505376	0.130435	27.5159
0.130435	0.505376	0.130435	27.5159
0.130435	0.505376	0.130435	27.5159
0.130435	0.505376	0.130435	27.5159
0.130435	0.505376	0.130435	27.5159
0.130435	0.505376	0.130435	27.5159
0.130435	0.505376	0.130435	27.5159
0.130435	0.505376	0.130435	27.5159
0.130435	0.505376	0.130435	27.5159
0.130435	0.505376	0.130435	27.5159
0.130435	0.505376	0.130435	27.5159
0.130435	0.505376	0.130435	27.5159
0.130435	0.505376	0.130435	27.5159
0.130435	0.505376	0.130435	27.5159
0.130435	0.505376	0.130435	27.5159
0.130435	0.505376	0.130435	27.5159
0.130435	0.505376	0.130435	27.5159
0.130435	0.505376	0.130435	27.5159
0.130435	0.505376	0.130435	27.5159
0.130435	0.505376	0.130435	27.5159
0.130435	0.505376	0.130435	27.5159
0.130435	0.505376	0.130435	27.5159
0.130435	0.505376	0.130435	27.5159
0.130435	0.505376	0.130435	27.5159
0.130435	0.505376	0.130435	27.5159
0.130469	0.505155	0.130469	27.5159
0.130469	0.505155	0.130469	27.5159
0.130469	0.505155	0.130469	27.5159
0.130469	0.505155	0.130469	27.5159
0.130469	0.505155	0.130469	27.5159
0.130469	0.505155	0.130469	27.5159
0.130469	0.505155	0.130469	27.5159
0.130469	0.505155	0.130469	27.5159
0.130469	0.505155	0.130469	27.5159
0.130469	0.505155	0.130469	27.5159
0.130469	0.505155	0.130469	27.5159
0.130469	0.505155	0.130469	27.5159
0.130469	0.505155	0.130469	27.5159
0.130501	0.504951	0.130501	27.5159
0.131276	0.5	0.131276	27.5159
0.131276	0.5	0.131276	27.5159
0.131276	0.5	0.131276	27.5159
0.131276	0.5	0.131276	27.5159
0.131276	0.5	0.131276	27.5159
0.131276	0.5	0.131276	27.5159
0.131276	0.5	0.131276	27.5159
0.131276	0.5	0.131276	27.5159
0.131276	0.5	0.131276	27.5159
0.131276	0.5	0.131276	27.5159
0.131276	0.5	0.131276	27.5159
0.131276	0.5	0.131276	27.5159
0.131276	0.5	0.131276	27.5159
0.131276	0.5	0.131276	27.5159
0.131276	0.5	0.131276	27.5159
0.131276	0.5	0.131276	27.5159
0.131276	0.5	0.131276	27.5159
0.131276	0.5	0.131276	27.5159
0.131276	0.5	0.131276	27.5159
0.131276	0.5	0.131276	27.5159
0.131276	0.5	0.131276	27.5159
0.131276	0.5	0.131276	27.5159
0.131276	0.5	0.131276	27.5159
0.131276	0.5	0.131276	27.5159
0.131276	0.5	0.131276	27.5159
0.131276	0.5	0.131276	27.5159
0.131276	0.5	0.131276	27.5159
0.131276	0.5	0.131276	27.5159
0.131276	0.5	0.131276	27.5159
0.131276	0.5	0.131276	27.5159
0.131276	0.5	0.131276	27.5159
0.131276	0.5	0.131276	27.5159
0.131276	0.5	0.131276	27.5159
0.131276	0.5	0.131276	27.5159
0.131276	0.5	0.131276	27.5159
0.131276	0.5	0.131276	27.5159
0.131276	0.5	0.131276	27.5159
0.131276	0.5	0.131276	27.5159
0.131276	0.5	0.131276	27.5159
0.131276	0.5	0.131276	27.5159
0.131276	0.5	0.131276	27.5159
0.131276	0.5	0.131276	27.5159
0.131276	0.5	0.131276	27.5159
0.131276	0.5	0.131276	27.5159
0.131276	0.5	0.131276	27.5159
0.131276	0.5	0.131276	27.5159
0.131276	0.5	0.131276	27.5159
0.131276	0.5	0.131276	27.5159
0.131276	0.5	0.131276	27.5159
0.131276	0.5	0.131276	27.5159
0.131276	0.5	0.131276	27.5159
0.131276	0.5	0.131276	27.5159
0.131276	0.5	0.131276	27.5159
0.131276	0.5	0.131276	27.5159
0.131276	0.5	0.131276	27.5159
0.131276	0.5	0.131276	27.5159
0.131276	0.5	0.131276	27.5159
0.131276	0.5	0.131276	27.5159
0.132076	0.494949	0.132076	27.5159
0.132076	0.494949	0.132076	27.5159
0.132076	0.494949	0.132076	27.5159
0.13211	0.494737	0.13211	27.5159
0.13211	0.494737	0.13211	27.5159
0.13211	0.494737	0.13211	27.5159
0.13211	0.494737	0.13211	27.5159
0.13211	0.494737	0.13211	27.5159
0.13211	0.494737	0.13211	27.5159
0.13211	0.494737	0.13211	27.5159
0.13211	0.494737	0.13211	27.5159
0.13211	0.494737	0.13211	27.5159
0.13211	0.494737	0.13211	27.5159
0.13211	0.494737	0.13211	27.5159
0.13211	0.494737	0.13211	27.5159
0.13211	0.494737	0.13211	27.5159
0.13211	0.494737	0.13211	27.5159
0.13211	0.494737	0.13211	27.5159
0.13211	0.494737	0.13211	27.5159
0.13211	0.494737	0.13211	27.5159
0.13211	0.494737	0.13211	27.5159
0.13211	0.494737	0.13211	27.5159
0.13211	0.494737	0.13211	27.5159
0.13211	0.494737	0.13211	27.5159
0.13211	0.494737	0.13211	27.5159
0.13211	0.494737	0.13211	27.5159
0.13211	0.494737	0.13211	27.5159
0.13211	0.494737	0.13211	27.5159
0.132147	0.494505	0.132147	27.5159
0.132147	0.494505	0.132147	27.5159
0.132147	0.494505	0.132147	27.5159
0.132147	0.494505	0.132147	27.5159
0.132147	0.494505	0.132147	27.5159
0.132147	0.494505	0.132147	27.5159
0.132147	0.494505	0.132147	27.5159
0.132147	0.494505	0.132147	27.5159
0.132147	0.494505	0.132147	27.5159
0.132147	0.494505	0.132147	27.5159
0.132147	0.494505	0.132147	27.5159
0.132147	0.494505	0.132147	27.5159
0.132147	0.494505	0.132147	27.5159
0.132147	0.494505	0.132147	27.5159
0.132147	0.494505	0.132147	27.5159
0.132147	0.494505	0.132147	27.5159
0.132147	0.494505	0.132147	27.5159
0.132147	0.494505	0.132147	27.5159
0.132147	0.494505	0.132147	27.5159
0.132147	0.494505	0.132147	27.5159
0.132147	0.494505	0.132147	27.5159
0.132147	0.494505	0.132147	27.5159
0.132147	0.494505	0.132147	27.5159
0.132147	0.494505	0.132147	27.5159
0.132147	0.494505	0.132147	27.5159
0.132147	0.494505	0.132147	27.5159
0.132147	0.494505	0.132147	27.5159
0.132147	0.494505	0.132147	27.5159
0.132147	0.494505	0.132147	27.5159
0.132147	0.494505	0.132147	27.5159
0.132147	0.494505	0.132147	27.5159
0.132147	0.494505	0.132147	27.5159
0.132188	0.494253	0.132188	27.5159
0.132188	0.494253	0.132188	27.5159
0.132188	0.494253	0.132188	27.5159
0.132839	0.490196	0.132839	27.5159
0.132903	0.489796	0.132903	27.5159
0.132903	0.489796	0.132903	27.5159
0.132903	0.489796	0.132903	27.5159
0.132903	0.489796	0.132903	27.5159
0.132903	0.489796	0.132903	27.5159
0.132903	0.489796	0.132903	27.5159
0.132974	0.489362	0.132974	27.5159
0.132974	0.489362	0.132974	27.5159
0.132974	0.489362	0.132974	27.5159
0.132974	0.489362	0.132974	27.5159
0.132974	0.489362	0.132974	27.5159
0.132974	0.489362	0.132974	27.5159
0.132974	0.489362	0.132974	27.5159
0.132974	0.489362	0.132974	27.5159
0.132974	0.489362	0.132974	27.5159
0.132974	0.489362	0.132974	27.5159
0.132974	0.489362	0.132974	27.5159
0.132974	0.489362	0.132974	27.5159
0.132974	0.489362	0.132974	27.5159
0.132974	0.489362	0.132974	27.5159
0.132974	0.489362	0.132974	27.5159
0.132974	0.489362	0.132974	27.5159
0.132974	0.489362	0.132974	27.5159
0.132974	0.489362	0.132974	27.5159
0.132974	0.489362	0.132974	27.5159
0.132974	0.489362	0.132974	27.5159
0.132974	0.489362	0.132974	27.5159
0.13305	0.488889	0.13305	27.5159
0.13305	0.488889	0.13305	27.5159
0.13305	0.488889	0.13305	27.5159
0.13305	0.488889	0.13305	27.5159
0.13305	0.488889	0.13305	27.5159
0.13305	0.488889	0.13305	27.5159
0.13305	0.488889	0.13305	27.5159
0.13305	0.488889	0.13305	27.5159
0.13305	0.488889	0.13305	27.5159
0.13305	0.488889	0.13305	27.5159
0.13305	0.488889	0.13305	27.5159
0.13305	0.488889	0.13305	27.5159
0.13305	0.488889	0.13305	27.5159
0.13305	0.488889	0.13305	27.5159
0.13305	0.488889	0.13305	27.5159
0.13305	0.488889	0.13305	27.5159
0.13305	0.488889	0.13305	27.5159
0.13305	0.488889	0.13305	27.5159
0.13305	0.488889	0.13305	27.5159
0.13305	0.488889	0.13305	27.5159
0.13305	0.488889	0.13305	27.5159
0.133134	0.488372	0.133134	27.5159
0.133658	0.485149	0.133658	27.5159
0.133758	0.484536	0.133758	27.5159
0.133758	0.484536	0.133758	27.5159
0.133758	0.484536	0.133758	27.5159
0.133758	0.484536	0.133758	27.5159
0.133758	0.484536	0.133758	27.5159
0.133758	0.484536	0.133758	27.5159
0.133758	0.484536	0.133758	27.5159
0.133758	0.484536	0.133758	27.5159
0.133867	0.483871	0.133867	27.5159
0.133867	0.483871	0.133867	27.5159
0.133867	0.483871	0.133867	27.5159
0.133867	0.483871	0.133867	27.5159
0.133867	0.483871	0.133867	27.5159
0.133867	0.483871	0.133867	27.5159
0.133867	0.483871	0.133867	27.5159
0.133867	0.483871	0.133867	27.5159
0.133867	0.483871	0.133867	27.5159
0.133867	0.483871	0.133867	27.5159
0.133867	0.483871	0.133867	27.5159
0.133867	0.483871	0.133867	27.5159
0.133867	0.483871	0.133867	27.5159
0.133867	0.483871	0.133867	27.5159
0.133867	0.483871	0.133867	27.5159
0.133867	0.483871	0.133867	27.5159
0.133867	0.483871	0.133867	27.5159
0.133867	0.483871	0.133867	27.5159
0.133867	0.483871	0.133867	27.5159
0.133867	0.483871	0.133867	27.5159
0.133867	0.483871	0.133867	27.5159
0.133867	0.483871	0.133867	27.5159
0.133867	0.483871	0.133867	27.5159
0.133867	0.483871	0.133867	27.5159
0.133867	0.483871	0.133867	27.5159
0.133867	0.483871	0.133867	27.5159
0.133986	0.483146	0.133986	27.5159
0.133986	0.483146	0.133986	27.5159
0.133986	0.483146	0.133986	27.5159
0.133986	0.483146	0.133986	27.5159
0.133986	0.483146	0.133986	27.5159
0.133986	0.483146	0.133986	27.5159
0.133986	0.483146	0.133986	27.5159
0.133986	0.483146	0.133986	27.5159
0.133986	0.483146	0.133986	27.5159
0.134504	0.48	0.134504	27.5159
0.134642	0.479167	0.134642	27.5159
0.134642	0.479167	0.134642	27.5159
0.134642	0.479167	0.134642	27.5159
0.134642	0.479167	0.134642	27.5159
0.134642	0.479167	0.134642	27.5159
0.134642	0.479167	0.134642	27.5159
0.134642	0.479167	0.134642	27.5159
0.134642	0.479167	0.134642	27.5159
0.134642	0.479167	0.134642	27.5159
0.134642	0.479167	0.134642	27.5159
0.134642	0.479167	0.134642	27.5159
0.134642	0.479167	0.134642	27.5159
0.134792	0.478261	0.134792	27.5159
0.134792	0.478261	0.134792	27.5159
0.134792	0.478261	0.134792	27.5159
0.134792	0.478261	0.134792	27.5159
0.134792	0.478261	0.134792	27.5159
0.134792	0.478261	0.134792	27.5159
0.134792	0.478261	0.134792	27.5159
0.134792	0.478261	0.134792	27.5159
0.134792	0.478261	0.134792	27.5159
0.134792	0.478261	0.134792	27.5159
0.134792	0.478261	0.134792	27.5159
0.134792	0.478261	0.134792	27.5159
0.134957	0.477273	0.134957	27.5159
0.134957	0.477273	0.134957	27.5159
0.134957	0.477273	0.134957	27.5159
0.134957	0.477273	0.134957	27.5159
0.134957	0.477273	0.134957	27.5159
0.134957	0.477273	0.134957	27.5159
0.134957	0.477273	0.134957	27.5159
0.135378	0.474747	0.135378	27.5159
0.135378	0.474747	0.135378	27.5159
0.135378	0.474747	0.135378	27.5159
0.135557	0.473684	0.135557	27.5159
0.135557	0.473684	0.135557	27.5159
0.135557	0.473684	0.135557	27.5159
0.135557	0.473684	0.135557	27.5159
0.135557	0.473684	0.135557	27.5159
0.135557	0.473684	0.135557	27.5159
0.135751	0.472527	0.135751	27.5159
0.135751	0.472527	0.135751	27.5159
0.135751	0.472527	0.135751	27.5159
0.135751	0.472527	0.135751	27.5159
0.135751	0.472527	0.135751	27.5159
0.135751	0.472527	0.135751	27.5159
0.135751	0.472527	0.135751	27.5159
0.135751	0.472527	0.135751	27.5159
0.135751	0.472527	0.135751	27.5159
0.135751	0.472527	0.135751	27.5159
0.135751	0.472527	0.135751	27.5159
0.135964	0.471264	0.135964	27.5159
0.135964	0.471264	0.135964	27.5159
0.135964	0.471264	0.135964	27.5159
0.136282	0.469388	0.136282	27.5159
0.136504	0.468085	0.136504	27.5159
0.136504	0.468085	0.136504	27.5159
0.136504	0.468085	0.136504	27.5159
0.136504	0.468085	0.136504	27.5159
0.136504	0.468085	0.136504	27.5159
0.136504	0.468085	0.136504	27.5159
0.136504	0.468085	0.136504	27.5159
0.136746	0.466667	0.136746	27.5159
0.136746	0.466667	0.136746	27.5159
0.136746	0.466667	0.136746	27.5159
0.136746	0.466667	0.136746	27.5159
0.136746	0.466667	0.136746	27.5159
0.136746	0.466667	0.136746	27.5159
0.136746	0.466667	0.136746	27.5159
0.136746	0.466667	0.136746	27.5159
0.136746	0.466667	0.136746	27.5159
0.137011	0.465116	0.137011	27.5159
0.137011	0.465116	0.137011	27.5159
0.137217	0.463918	0.137217	27.5159
0.137217	0.463918	0.137217	27.5159
0.137217	0.463918	0.137217	27.5159
0.137217	0.463918	0.137217	27.5159
0.137485	0.462366	0.137485	27.5159
0.137485	0.462366	0.137485	27.5159
0.137778	0.460674	0.137778	27.5159
0.137778	0.460674	0.137778	27.5159
0.137778	0.460674	0.137778	27.5159
0.138502	0.456522	0.138502	27.5159
0.138502	0.456522	0.138502	27.5159
0.138502	0.456522	0.138502	27.5159
0.138502	0.456522	0.138502	27.5159
0.13885	0.454545	0.13885	27.5159
0.13885	0.454545	0.13885	27.5159
0.13885	0.454545	0.13885	27.5159
0.139188	0.452632	0.139188	27.5159
0.139188	0.452632	0.139188	27.5159
0.139188	0.452632	0.139188	27.5159
0.139557	0.450549	0.139557	27.5159
0.139557	0.450549	0.139557	27.5159
0.140227	0.446809	0.140227	27.5159
0.140227	0.446809	0.140227	27.5159
0.140653	0.444444	0.140653	27.5159
0.141304	0.44086	0.141304	27.5159
0.14192	0.4375	0.14192	27.5159
0.143583	0.428571	0.143583	27.5159
0.143583	0.428571	0.143583	27.5159
0.14479	0.422222	0.14479	27.5159
0.146045	0.41573	0.146045	27.5159
0.155637	0.369565	0.155637	27.5159
0.164358	0.111111	0.164358	27.0957
0.165536	0.546392	0.165536	27.9348
0.16764	0.535354	0.16764	27.9348
0.16764	0.535354	0.16764	27.9348
0.16764	0.535354	0.16764	27.9348
0.16764	0.535354	0.16764	27.9348
0.168794	0.529412	0.168794	27.9348
0.169291	0.526882	0.169291	27.9348
0.169291	0.526882	0.169291	27.9348
0.169291	0.526882	0.169291	27.9348
0.169509	0.525773	0.169509	27.9348
0.170309	0.521739	0.170309	27.9348
0.170309	0.521739	0.170309	27.9348
0.170309	0.521739	0.170309	27.9348
0.170309	0.521739	0.170309	27.9348
0.170309	0.521739	0.170309	27.9348
0.170309	0.521739	0.170309	27.9348
0.170309	0.521739	0.170309	27.9348
0.170489	0.520833	0.170489	27.9348
0.170489	0.520833	0.170489	27.9348
0.170489	0.520833	0.170489	27.9348
0.170656	0.52	0.170656	27.9348
0.170656	0.52	0.170656	27.9348
0.170656	0.52	0.170656	27.9348
0.171362	0.516484	0.171362	27.9348
0.171362	0.516484	0.171362	27.9348
0.171362	0.516484	0.171362	27.9348
0.171362	0.516484	0.171362	27.9348
0.171362	0.516484	0.171362	27.9348
0.171362	0.516484	0.171362	27.9348
0.171362	0.516484	0.171362	27.9348
0.171362	0.516484	0.171362	27.9348
0.171362	0.516484	0.171362	27.9348
0.171362	0.516484	0.171362	27.9348
0.171362	0.516484	0.171362	27.9348
0.171362	0.516484	0.171362	27.9348
0.171362	0.516484	0.171362	27.9348
0.171362	0.516484	0.171362	27.9348
0.171362	0.516484	0.171362	27.9348
0.171502	0.515789	0.171502	27.9348
0.171502	0.515789	0.171502	27.9348
0.171502	0.515789	0.171502	27.9348
0.171502	0.515789	0.171502	27.9348
0.171502	0.515789	0.171502	27.9348
0.171502	0.515789	0.171502	27.9348
0.171631	0.515152	0.171631	27.9348
0.171631	0.515152	0.171631	27.9348
0.17175	0.514563	0.17175	27.9348
0.172452	0.511111	0.172452	27.9348
0.172452	0.511111	0.172452	27.9348
0.172452	0.511111	0.172452	27.9348
0.172452	0.511111	0.172452	27.9348
0.172452	0.511111	0.172452	27.9348
0.172452	0.511111	0.172452	27.9348
0.172452	0.511111	0.172452	27.9348
0.172452	0.511111	0.172452	27.9348
0.172452	0.511111	0.172452	27.9348
0.172452	0.511111	0.172452	27.9348
0.172452	0.511111	0.172452	27.9348
0.172452	0.511111	0.172452	27.9348
0.172452	0.511111	0.172452	27.9348
0.172452	0.511111	0.172452	27.9348
0.172452	0.511111	0.172452	27.9348
0.172452	0.511111	0.172452	27.9348
0.172452	0.511111	0.172452	27.9348
0.172549	0.510638	0.172549	27.9348
0.172549	0.510638	0.172549	27.9348
0.172549	0.510638	0.172549	27.9348
0.172549	0.510638	0.172549	27.9348
0.172549	0.510638	0.172549	27.9348
0.172549	0.510638	0.172549	27.9348
0.172549	0.510638	0.172549	27.9348
0.172549	0.510638	0.172549	27.9348
0.172549	0.510638	0.172549	27.9348
0.172549	0.510638	0.172549	27.9348
0.172549	0.510638	0.172549	27.9348
0.172549	0.510638	0.172549	27.9348
0.172549	0.510638	0.172549	27.9348
0.172549	0.510638	0.172549	27.9348
0.172549	0.510638	0.172549	27.9348
0.172549	0.510638	0.172549	27.9348
0.172549	0.510638	0.172549	27.9348
0.172549	0.510638	0.172549	27.9348
0.172638	0.510204	0.172638	27.9348
0.172638	0.510204	0.172638	27.9348
0.172638	0.510204	0.172638	27.9348
0.172638	0.510204	0.172638	27.9348
0.172638	0.510204	0.172638	27.9348
0.17272	0.509804	0.17272	27.9348
0.17272	0.509804	0.17272	27.9348
0.173581	0.505618	0.173581	27.9348
0.173581	0.505618	0.173581	27.9348
0.173581	0.505618	0.173581	27.9348
0.173581	0.505618	0.173581	27.9348
0.173581	0.505618	0.173581	27.9348
0.173581	0.505618	0.173581	27.9348
0.173581	0.505618	0.173581	27.9348
0.173581	0.505618	0.173581	27.9348
0.173581	0.505618	0.173581	27.9348
0.173581	0.505618	0.173581	27.9348
0.173581	0.505618	0.173581	27.9348
0.173581	0.505618	0.173581	27.9348
0.173581	0.505618	0.173581	27.9348
0.173581	0.505618	0.173581	27.9348
0.173632	0.505376	0.173632	27.9348
0.173632	0.505376	0.173632	27.9348
0.173632	0.505376	0.173632	27.9348
0.173632	0.505376	0.173632	27.9348
0.173632	0.505376	0.173632	27.9348
0.173632	0.505376	0.173632	27.9348
0.173632	0.505376	0.173632	27.9348
0.173632	0.505376	0.173632	27.9348
0.173632	0.505376	0.173632	27.9348
0.173632	0.505376	0.173632	27.9348
0.173632	0.505376	0.173632	27.9348
0.173632	0.505376	0.173632	27.9348
0.173632	0.505376	0.173632	27.9348
0.173632	0.505376	0.173632	27.9348
0.173632	0.505376	0.173632	27.9348
0.173632	0.505376	0.173632	27.9348
0.173632	0.505376	0.173632	27.9348
0.173632	0.505376	0.173632	27.9348
0.173632	0.505376	0.173632	27.9348
0.173632	0.505376	0.173632	27.9348
0.173677	0.505155	0.173677	27.9348
0.173677	0.505155	0.173677	27.9348
0.173677	0.505155	0.173677	27.9348
0.17372	0.504951	0.17372	27.9348
0.174752	0.5	0.174752	27.9348
0.174752	0.5	0.174752	27.9348
0.174752	0.5	0.174752	27.9348
0.174752	0.5	0.174752	27.9348
0.174752	0.5	0.174752	27.9348
0.174752	0.5	0.174752	27.9348
0.174752	0.5	0.174752	27.9348
0.174752	0.5	0.174752	27.9348
0.174752	0.5	0.174752	27.9348
0.174752	0.5	0.174752	27.9348
0.174752	0.5	0.174752	27.9348
0.174752	0.5	0.174752	27.9348
0.174752	0.5	0.174752	27.9348
0.174752	0.5	0.174752	27.9348
0.174752	0.5	0.174752	27.9348
0.174752	0.5	0.174752	27.9348
0.174752	0.5	0.174752	27.9348
0.174752	0.5	0.174752	27.9348
0.174752	0.5	0.174752	27.9348
0.174752	0.5	0.174752	27.9348
0.174752	0.5	0.174752	27.9348
0.174752	0.5	0.174752	27.9348
0.174752	0.5	0.174752	27.9348
0.174752	0.5	0.174752	27.9348
0.174752	0.5	0.174752	27.9348
0.174752	0.5	0.174752	27.9348
0.174752	0.5	0.174752	27.9348
0.174752	0.5	0.174752	27.9348
0.174752	0.5	0.174752	27.9348
0.174752	0.5	0.174752	27.9348
0.174752	0.5	0.174752	27.9348
0.174752	0.5	0.174752	27.9348
0.174752	0.5	0.174752	27.9348
0.174752	0.5	0.174752	27.9348
0.174752	0.5	0.174752	27.9348
0.174752	0.5	0.174752	27.9348
0.174752	0.5	0.174752	27.9348
0.174752	0.5	0.174752	27.9348
0.174752	0.5	0.174752	27.9348
0.174752	0.5	0.174752	27.9348
0.174752	0.5	0.174752	27.9348
0.174752	0.5	0.174752	27.9348
0.174752	0.5	0.174752	27.9348
0.174752	0.5	0.174752	27.9348
0.174752	0.5	0.174752	27.9348
0.174752	0.5	0.174752	27.9348
0.174752	0.5	0.174752	27.9348
0.174752	0.5	0.174752	27.9348
0.174752	0.5	0.174752	27.9348
0.174752	0.5	0.174752	27.9348
0.174752	0.5	0.174752	27.9348
0.174752	0.5	0.174752	27.9348
0.174752	0.5	0.174752	27.9348
0.174752	0.5	0.174752	27.9348
0.174752	0.5	0.174752	27.9348
0.174752	0.5	0.174752	27.9348
0.174752	0.5	0.174752	27.9348
0.174752	0.5	0.174752	27.9348
0.174752	0.5	0.174752	27.9348
0.175776	0.495146	0.175776	27.9348
0.175817	0.494949	0.175817	27.9348
0.175817	0.494949	0.175817	27.9348
0.175862	0.494737	0.175862	27.9348
0.175862	0.494737	0.175862	27.9348
0.175862	0.494737	0.175862	27.9348
0.175862	0.494737	0.175862	27.9348
0.175862	0.494737	0.175862	27.9348
0.175862	0.494737	0.175862	27.9348
0.175862	0.494737	0.175862	27.9348
0.175862	0.494737	0.175862	27.9348
0.175862	0.494737	0.175862	27.9348
0.175862	0.494737	0.175862	27.9348
0.175862	0.494737	0.175862	27.9348
0.175862	0.494737	0.175862	27.9348
0.175912	0.494505	0.175912	27.9348
0.175912	0.494505	0.175912	27.9348
0.175912	0.494505	0.175912	27.9348
0.175912	0.494505	0.175912	27.9348
0.175912	0.494505	0.175912	27.9348
0.175912	0.494505	0.175912	27.9348
0.175912	0.494505	0.175912	27.9348
0.175912	0.494505	0.175912	27.9348
0.175912	0.494505	0.175912	27.9348
0.175912	0.494505	0.175912	27.9348
0.175912	0.494505	0.175912	27.9348
0.175912	0.494505	0.175912	27.9348
0.175912	0.494505	0.175912	27.9348
0.175912	0.494505	0.175912	27.9348
0.175912	0.494505	0.175912	27.9348
0.175912	0.494505	0.175912	27.9348
0.175912	0.494505	0.175912	27.9348
0.175912	0.494505	0.175912	27.9348
0.175912	0.494505	0.175912	27.9348
0.175912	0.494505	0.175912	27.9348
0.175912	0.494505	0.175912	27.9348
0.175912	0.494505	0.175912	27.9348
0.175912	0.494505	0.175912	27.9348
0.175912	0.494505	0.175912	27.9348
0.175912	0.494505	0.175912	27.9348
0.175912	0.494505	0.175912	27.9348
0.175912	0.494505	0.175912	27.9348
0.175912	0.494505	0.175912	27.9348
0.175912	0.494505	0.175912	27.9348
0.175912	0.494505	0.175912	27.9348
0.175912	0.494505	0.175912	27.9348
0.175912	0.494505	0.175912	27.9348
0.175912	0.494505	0.175912	27.9348
0.175912	0.494505	0.175912	27.9348
0.175912	0.494505	0.175912	27.9348
0.175912	0.494505	0.175912	27.9348
0.175912	0.494505	0.175912	27.9348
0.175912	0.494505	0.175912	27.9348
0.175912	0.494505	0.175912	27.9348
0.175965	0.494253	0.175965	27.9348
0.175965	0.494253	0.175965	27.9348
0.175965	0.494253	0.175965	27.9348
0.175965	0.494253	0.175965	27.9348
0.176753	0.490566	0.176753	27.9348
0.176832	0.490196	0.176832	27.9348
0.176832	0.490196	0.176832	27.9348
0.176918	0.489796	0.176918	27.9348
0.176918	0.489796	0.176918	27.9348
0.176918	0.489796	0.176918	27.9348
0.177011	0.489362	0.177011	27.9348
0.177011	0.489362	0.177011	27.9348
0.177011	0.489362	0.177011	27.9348
0.177011	0.489362	0.177011	27.9348
0.177011	0.489362	0.177011	27.9348
0.177011	0.489362	0.177011	27.9348
0.177011	0.489362	0.177011	27.9348
0.177011	0.489362	0.177011	27.9348
0.177011	0.489362	0.177011	27.9348
0.177011	0.489362	0.177011	27.9348
0.177113	0.488889	0.177113	27.9348
0.177113	0.488889	0.177113	27.9348
0.177113	0.488889	0.177113	27.9348
0.177113	0.488889	0.177113	27.9348
0.177113	0.488889	0.177113	27.9348
0.177113	0.488889	0.177113	27.9348
0.177113	0.488889	0.177113	27.9348
0.177113	0.488889	0.177113	27.9348
0.177113	0.488889	0.177113	27.9348
0.177113	0.488889	0.177113	27.9348
0.177113	0.488889	0.177113	27.9348
0.177113	0.488889	0.177113	27.9348
0.177113	0.488889	0.177113	27.9348
0.177113	0.488889	0.177113	27.9348
0.177113	0.488889	0.177113	27.9348
0.177113	0.488889	0.177113	27.9348
0.177113	0.488889	0.177113	27.9348
0.177113	0.488889	0.177113	27.9348
0.177113	0.488889	0.177113	27.9348
0.177113	0.488889	0.177113	27.9348
0.177113	0.488889	0.177113	27.9348
0.177113	0.488889	0.177113	27.9348
0.177113	0.488889	0.177113	27.9348
0.177113	0.488889	0.177113	27.9348
0.177113	0.488889	0.177113	27.9348
0.177113	0.488889	0.177113	27.9348
0.177113	0.488889	0.177113	27.9348
0.177113	0.488889	0.177113	27.9348
0.177113	0.488889	0.177113	27.9348
0.177113	0.488889	0.177113	27.9348
0.177113	0.488889	0.177113	27.9348
0.177225	0.488372	0.177225	27.9348
0.177225	0.488372	0.177225	27.9348
0.177923	0.485149	0.177923	27.9348
0.177923	0.485149	0.177923	27.9348
0.177923	0.485149	0.177923	27.9348
0.178056	0.484536	0.178056	27.9348
0.178056	0.484536	0.178056	27.9348
0.178201	0.483871	0.178201	27.9348
0.178201	0.483871	0.178201	27.9348
0.178201	0.483871	0.178201	27.9348
0.178201	0.483871	0.178201	27.9348
0.178201	0.483871	0.178201	27.9348
0.178201	0.483871	0.178201	27.9348
0.178201	0.483871	0.178201	27.9348
0.178201	0.483871	0.178201	27.9348
0.178201	0.483871	0.178201	27.9348
0.178201	0.483871	0.178201	27.9348
0.178201	0.483871	0.178201	27.9348
0.178201	0.483871	0.178201	27.9348
0.178201	0.483871	0.178201	27.9348
0.178201	0.483871	0.178201	27.9348
0.178201	0.483871	0.178201	27.9348
0.178201	0.483871	0.178201	27.9348
0.178201	0.483871	0.178201	27.9348
0.178201	0.483871	0.178201	27.9348
0.178201	0.483871	0.178201	27.9348
0.178201	0.483871	0.178201	27.9348
0.178359	0.483146	0.178359	27.9348
0.178359	0.483146	0.178359	27.9348
0.178359	0.483146	0.178359	27.9348
0.178359	0.483146	0.178359	27.9348
0.178359	0.483146	0.178359	27.9348
0.178359	0.483146	0.178359	27.9348
0.178359	0.483146	0.178359	27.9348
0.178359	0.483146	0.178359	27.9348
0.178359	0.483146	0.178359	27.9348
0.178359	0.483146	0.178359	27.9348
0.179049	0.48	0.179049	27.9348
0.179049	0.48	0.179049	27.9348
0.179233	0.479167	0.179233	27.9348
0.179233	0.479167	0.179233	27.9348
0.179233	0.479167	0.179233	27.9348
0.179433	0.478261	0.179433	27.9348
0.179433	0.478261	0.179433	27.9348
0.179433	0.478261	0.179433	27.9348
0.179433	0.478261	0.179433	27.9348
0.179433	0.478261	0.179433	27.9348
0.179433	0.478261	0.179433	27.9348
0.179433	0.478261	0.179433	27.9348
0.179433	0.478261	0.179433	27.9348
0.179433	0.478261	0.179433	27.9348
0.179433	0.478261	0.179433	27.9348
0.179433	0.478261	0.179433	27.9348
0.179433	0.478261	0.179433	27.9348
0.179433	0.478261	0.179433	27.9348
0.179433	0.478261	0.179433	27.9348
0.179433	0.478261	0.179433	27.9348
0.179433	0.478261	0.179433	27.9348
0.179433	0.478261	0.179433	27.9348
0.179651	0.477273	0.179651	27.9348
0.179651	0.477273	0.179651	27.9348
0.179651	0.477273	0.179651	27.9348
0.179651	0.477273	0.179651	27.9348
0.179651	0.477273	0.179651	27.9348
0.179651	0.477273	0.179651	27.9348
0.179651	0.477273	0.179651	27.9348
0.179651	0.477273	0.179651	27.9348
0.179651	0.477273	0.179651	27.9348
0.179651	0.477273	0.179651	27.9348
0.179651	0.477273	0.179651	27.9348
0.180213	0.474747	0.180213	27.9348
0.18045	0.473684	0.18045	27.9348
0.18045	0.473684	0.18045	27.9348
0.18045	0.473684	0.18045	27.9348
0.18045	0.473684	0.18045	27.9348
0.180709	0.472527	0.180709	27.9348
0.180709	0.472527	0.180709	27.9348
0.180709	0.472527	0.180709	27.9348
0.180709	0.472527	0.180709	27.9348
0.180709	0.472527	0.180709	27.9348
0.180709	0.472527	0.180709	27.9348
0.180709	0.472527	0.180709	27.9348
0.180709	0.472527	0.180709	27.9348
0.180709	0.472527	0.180709	27.9348
0.180709	0.472527	0.180709	27.9348
0.180709	0.472527	0.180709	27.9348
0.180993	0.471264	0.180993	27.9348
0.180993	0.471264	0.180993	27.9348
0.180993	0.471264	0.180993	27.9348
0.181711	0.468085	0.181711	27.9348
0.181711	0.468085	0.181711	27.9348
0.181711	0.468085	0.181711	27.9348
0.182033	0.466667	0.182033	27.9348
0.182033	0.466667	0.182033	27.9348
0.182033	0.466667	0.182033	27.9348
0.182033	0.466667	0.182033	27.9348
0.182033	0.466667	0.182033	27.9348
0.182033	0.466667	0.182033	27.9348
0.182334	0.465347	0.182334	27.9348
0.182661	0.463918	0.182661	27.9348
0.183017	0.462366	0.183017	27.9348
0.183017	0.462366	0.183017	27.9348
0.183017	0.462366	0.183017	27.9348
0.183017	0.462366	0.183017	27.9348
0.183407	0.460674	0.183407	27.9348
0.183407	0.460674	0.183407	27.9348
0.183407	0.460674	0.183407	27.9348
0.183835	0.458824	0.183835	27.9348
0.183949	0.458333	0.183949	27.9348
0.183949	0.458333	0.183949	27.9348
0.184371	0.456522	0.184371	27.9348
0.184371	0.456522	0.184371	27.9348
0.184834	0.454545	0.184834	27.9348
0.185284	0.452632	0.185284	27.9348
0.185776	0.450549	0.185776	27.9348
0.186472	0.253333	0.186472	27.5159
0.186667	0.446809	0.186667	27.9348
0.186667	0.446809	0.186667	27.9348
0.186667	0.446809	0.186667	27.9348
0.187234	0.444444	0.187234	27.9348
0.187234	0.444444	0.187234	27.9348
0.188101	0.44086	0.188101	27.9348
0.188101	0.44086	0.188101	27.9348
0.188749	0.438202	0.188749	27.9348
0.188749	0.438202	0.188749	27.9348
0.188921	0.4375	0.188921	27.9348
0.190324	0.431818	0.190324	27.9348
0.1919	0.425532	0.1919	27.9348
0.192741	0.422222	0.192741	27.9348
0.192741	0.422222	0.192741	27.9348
0.193475	0.419355	0.193475	27.9348
0.193475	0.419355	0.193475	27.9348
0.195111	0.413043	0.195111	27.9348
0.195771	0.410526	0.195771	27.9348
0.195771	0.410526	0.195771	27.9348
0.200964	0.391304	0.200964	27.9348
0.200964	0.391304	0.200964	27.9348
0.202837	0.384615	0.202837	27.9348
0.204347	0.37931	0.204347	27.9348
0.204787	0.377778	0.204787	27.9348
0.211545	0.525773	0.211545	28.3523
0.212977	0.52	0.212977	28.3523
0.215218	0.511111	0.215218	28.3523
0.21669	0.505376	0.21669	28.3523
0.218088	0.5	0.218088	28.3523
0.218088	0.5	0.218088	28.3523
0.218088	0.5	0.218088	28.3523
0.218088	0.5	0.218088	28.3523
0.219474	0.494737	0.219474	28.3523
0.219474	0.494737	0.219474	28.3523
0.219536	0.494505	0.219536	28.3523
0.220792	0.489796	0.220792	28.3523
0.220908	0.489362	0.220908	28.3523
0.220908	0.489362	0.220908	28.3523
0.221035	0.488889	0.221035	28.3523
0.222045	0.485149	0.222045	28.3523
0.222045	0.485149	0.222045	28.3523
0.222392	0.483871	0.222392	28.3523
0.22259	0.483146	0.22259	28.3523
0.223451	0.48	0.223451	28.3523
0.224203	0.477273	0.224203	28.3523
0.224502	0.47619	0.224502	28.3523
0.2252	0.473684	0.2252	28.3523
0.225523	0.472527	0.225523	28.3523
0.225523	0.472527	0.225523	28.3523
0.225523	0.472527	0.225523	28.3523
0.225877	0.471264	0.225877	28.3523
0.226405	0.469388	0.226405	28.3523
0.226773	0.468085	0.226773	28.3523
0.226773	0.468085	0.226773	28.3523
0.227175	0.466667	0.227175	28.3523
0.227175	0.466667	0.227175	28.3523
0.228403	0.462366	0.228403	28.3523
0.228403	0.462366	0.228403	28.3523
0.228403	0.462366	0.228403	28.3523
0.228403	0.462366	0.228403	28.3523
0.22889	0.460674	0.22889	28.3523
0.22889	0.460674	0.22889	28.3523
0.22889	0.460674	0.22889	28.3523
0.22889	0.460674	0.22889	28.3523
0.22889	0.460674	0.22889	28.3523
0.229566	0.458333	0.229566	28.3523
0.230093	0.456522	0.230093	28.3523
0.230093	0.456522	0.230093	28.3523
0.23067	0.454545	0.23067	28.3523
0.23067	0.454545	0.23067	28.3523
0.23067	0.454545	0.23067	28.3523
0.231232	0.452632	0.231232	28.3523
0.231232	0.452632	0.231232	28.3523
0.231232	0.452632	0.231232	28.3523
0.231846	0.450549	0.231846	28.3523
0.232311	0.44898	0.232311	28.3523
0.235556	0.438202	0.235556	28.3523
0.235771	0.4375	0.235771	28.3523
0.235771	0.4375	0.235771	28.3523
0.236605	0.434783	0.236605	28.3523
0.237596	0.431579	0.237596	28.3523
0.237596	0.431579	0.237596	28.3523
0.238534	0.428571	0.238534	28.3523
0.238534	0.428571	0.238534	28.3523
0.238534	0.428571	0.238534	28.3523
0.239566	0.425287	0.239566	28.3523
0.240538	0.422222	0.240538	28.3523
0.240538	0.422222	0.240538	28.3523
0.24232	0.416667	0.24232	28.3523
0.24432	0.410526	0.24432	28.3523
0.245619	0.406593	0.245619	28.3523
0.247053	0.402299	0.247053	28.3523
0.248556	0.397849	0.248556	28.3523
0.250127	0.393258	0.250127	28.3523
0.250801	0.391304	0.250801	28.3523
0.250801	0.391304	0.250801	28.3523
0.250801	0.391304	0.250801	28.3523
0.250801	0.391304	0.250801	28.3523
0.252523	0.386364	0.252523	28.3523
0.253138	0.384615	0.253138	28.3523
0.255161	0.52	0.255161	28.7684
0.257032	0.373737	0.257032	28.3523
0.261285	0.5	0.261285	28.7684
0.261285	0.5	0.261285	28.7684
0.263816	0.355556	0.263816	28.3523
0.264816	0.488889	0.264816	28.7684
0.266442	0.483871	0.266442	28.7684
0.266442	0.483871	0.266442	28.7684
0.266678	0.483146	0.266678	28.7684
0.267457	0.480769	0.267457	28.7684
0.267985	0.479167	0.267985	28.7684
0.270192	0.472527	0.270192	28.7684
0.27169	0.468085	0.27169	28.7684
0.273643	0.462366	0.273643	28.7684
0.276359	0.454545	0.276359	28.7684
0.276359	0.454545	0.276359	28.7684
0.277032	0.452632	0.277032	28.7684
0.278576	0.448276	0.278576	28.7684
0.279948	0.444444	0.279948	28.7684
0.279948	0.444444	0.279948	28.7684
0.280361	0.443299	0.280361	28.7684
0.280361	0.443299	0.280361	28.7684
0.28347	0.434783	0.28347	28.7684
0.28347	0.434783	0.28347	28.7684
0.284568	0.431818	0.284568	28.7684
0.284568	0.431818	0.284568	28.7684
0.28578	0.428571	0.28578	28.7684
0.289032	0.42	0.289032	28.7684
0.28928	0.419355	0.28928	28.7684
0.290317	0.416667	0.290317	28.7684
0.291297	0.414141	0.291297	28.7684
0.293279	0.409091	0.293279	28.7684
0.294269	0.406593	0.294269	28.7684
0.294269	0.406593	0.294269	28.7684
0.295987	0.402299	0.295987	28.7684
0.295987	0.402299	0.295987	28.7684
0.296915	0.4	0.296915	28.7684
0.297788	0.397849	0.297788	28.7684
0.300478	0.391304	0.300478	28.7684
0.300478	0.391304	0.300478	28.7684
0.301957	0.387755	0.301957	28.7684
0.304623	0.381443	0.304623	28.7684
0.307394	0.375	0.307394	28.7684
0.312153	0.479167	0.312153	29.1833
0.312501	0.478261	0.312501	29.1833
0.314044	0.36	0.314044	28.7684
0.314094	0.245283	0.314094	28.3523
0.314845	0.243902	0.314845	28.3523
0.316709	0.354167	0.316709	28.7684
0.319423	0.460674	0.319423	29.1833
0.319423	0.460674	0.319423	29.1833
0.319657	0.347826	0.319657	28.7684
0.321907	0.454545	0.321907	29.1833
0.322691	0.452632	0.322691	29.1833
0.322691	0.452632	0.322691	29.1833
0.32449	0.448276	0.32449	29.1833
0.324763	0.447619	0.324763	29.1833
0.326088	0.444444	0.326088	29.1833
0.327598	0.44086	0.327598	29.1833
0.329026	0.4375	0.329026	29.1833
0.329026	0.4375	0.329026	29.1833
0.329404	0.218391	0.329404	28.3523
0.332882	0.428571	0.332882	29.1833
0.334215	0.425532	0.334215	29.1833
0.334323	0.425287	0.334323	29.1833
0.335679	0.422222	0.335679	29.1833
0.339308	0.414141	0.339308	29.1833
0.340957	0.410526	0.340957	29.1833
0.342769	0.406593	0.342769	29.1833
0.344881	0.402062	0.344881	29.1833
0.345851	0.4	0.345851	29.1833
0.346868	0.397849	0.346868	29.1833
0.347827	0.395833	0.347827	29.1833
0.347827	0.395833	0.347827	29.1833
0.350001	0.391304	0.350001	29.1833
0.350888	0.389474	0.350888	29.1833
0.353575	0.485149	0.353575	29.5969
0.355892	0.37931	0.355892	29.1833
0.356178	0.479167	0.356178	29.5969
0.356988	0.276596	0.356988	28.7684
0.362991	0.463918	0.362991	29.5969
0.363895	0.363636	0.363895	29.1833
0.368547	0.354839	0.368547	29.1833
0.368908	0.354167	0.368908	29.1833
0.376301	0.340659	0.376301	29.1833
0.378219	0.431818	0.378219	29.5969
0.378337	0.431579	0.378337	29.5969
0.383022	0.422222	0.383022	29.5969
0.384483	0.326316	0.384483	29.1833
0.387732	0.413043	0.387732	29.5969
0.3882	0.32	0.3882	29.1833
0.390284	0.408163	0.390284	29.5969
0.391112	0.406593	0.391112	29.5969
0.393522	0.402062	0.393522	29.5969
0.395068	0.308642	0.395068	29.1833
0.399364	0.391304	0.399364	29.5969
0.401001	0.477273	0.401001	30.0091
0.403085	0.384615	0.403085	29.5969
0.404874	0.381443	0.404874	29.5969
0.404874	0.381443	0.404874	29.5969
0.406961	0.377778	0.406961	29.5969
0.40789	0.288462	0.40789	29.1833
0.412139	0.282051	0.412139	29.1833
0.412387	0.368421	0.412387	29.5969
0.414672	0.450549	0.414672	30.0091
0.415814	0.362637	0.415814	29.5969
0.420937	0.354167	0.420937	29.5969
0.42541	0.346939	0.42541	29.5969
0.426008	0.177778	0.426008	28.7684
0.429373	0.340659	0.429373	29.5969
0.429794	0.34	0.429794	29.5969
0.431488	0.42	0.431488	30.0091
0.434092	0.333333	0.434092	29.5969
0.436983	0.410526	0.436983	30.0091
0.43871	0.326316	0.43871	29.5969
0.439306	0.406593	0.439306	30.0091
0.442013	0.402062	0.442013	30.0091
0.442951	0.32	0.442951	29.5969
0.444559	0.397849	0.444559	30.0091
0.444559	0.397849	0.444559	30.0091
0.446246	0.474747	0.446246	30.4201
0.449711	0.389474	0.449711	30.0091
0.451125	-0.010526	0.451125	27.9348
0.451455	0.307692	0.451455	29.5969
0.452754	0.384615	0.452754	30.0091
0.454955	0.224138	0.454955	29.1833
0.459719	0.373737	0.459719	30.0091
0.463912	0.367347	0.463912	30.0091
0.464571	0.212598	0.464571	29.1833
0.464582	0.366337	0.464582	30.0091
0.465215	0.365385	0.465215	30.0091
0.468828	0.36	0.468828	30.0091
0.469354	0.359223	0.469354	30.0091
0.471853	0.355556	0.471853	30.0091
0.472344	0.354839	0.472344	30.0091
0.472556	0.27907	0.472556	29.5969
0.472806	0.354167	0.472806	30.0091
0.474472	0.276596	0.474472	29.5969
0.477207	0.347826	0.477207	30.0091
0.477207	0.347826	0.477207	30.0091
0.479087	0.419355	0.479087	30.4201
0.485161	0.263158	0.485161	29.5969
0.486318	0.408163	0.486318	30.4201
0.487349	0.406593	0.487349	30.4201
0.487581	0.333333	0.487581	30.0091
0.487581	0.333333	0.487581	30.0091
0.487581	0.333333	0.487581	30.0091
0.487581	0.333333	0.487581	30.0091
0.48904	0.258427	0.48904	29.5969
0.492768	0.326316	0.492768	30.0091
0.492939	0.326087	0.492939	30.0091
0.496294	0.393258	0.496294	30.4201
0.497632	0.391304	0.497632	30.4201
0.497846	0.319588	0.497846	30.0091
0.498181	0.319149	0.498181	30.0091
0.49892	0.318182	0.49892	30.0091
0.502268	0.384615	0.502268	30.4201
0.502268	0.384615	0.502268	30.4201
0.503416	0.382979	0.503416	30.4201
0.503416	0.382979	0.503416	30.4201
0.503834	0.311828	0.503834	30.0091
0.508329	0.306122	0.508329	30.0091
0.513022	0.369565	0.513022	30.4201
0.52091	0.222222	0.52091	29.5969
0.521207	0.290323	0.521207	30.0091
0.5221	0.289256	0.5221	30.0091
0.523904	0.219048	0.523904	29.5969
0.524001	0.354839	0.524001	30.4201
0.525087	0.285714	0.525087	30.0091
0.535385	0.340206	0.535385	30.4201
0.535385	0.340206	0.535385	30.4201
0.535549	0.34	0.535549	30.4201
0.544038	0.264151	0.544038	30.0091
0.546091	0.261905	0.546091	30.0091
0.546848	0.326087	0.546848	30.4201
0.551943	0.32	0.551943	30.4201
0.552663	0.319149	0.552663	30.4201
0.555167	0.252174	0.555167	30.0091
0.558353	0.3125	0.558353	30.4201
0.559116	0.375	0.559116	30.8298
0.559116	0.375	0.559116	30.8298
0.568283	0.425743	0.568283	31.2383
0.569012	0.175258	0.569012	29.5969
0.574711	0.294118	0.574711	30.4201
0.575801	0.292929	0.575801	30.4201
0.57954	0.288889	0.57954	30.4201
0.581812	0.347368	0.581812	30.8298
0.587693	0.159091	0.587693	29.5969
0.589525	0.278351	0.589525	30.4201
0.594995	0.272727	0.594995	30.4201
0.594995	0.272727	0.594995	30.4201
0.599593	0.208791	0.599593	30.0091
0.600381	0.326316	0.600381	30.8298
0.606568	0.319588	0.606568	30.8298
0.606568	0.319588	0.606568	30.8298
0.606568	0.319588	0.606568	30.8298
0.606975	0.319149	0.606975	30.8298
0.606975	0.319149	0.606975	30.8298
0.61259	0.255319	0.61259	30.4201
0.613585	0.196429	0.613585	30.0091
0.61571	0.252336	0.61571	30.4201
0.618558	0.306931	0.618558	30.8298
0.626835	0.354839	0.626835	31.2383
0.628568	0.352941	0.628568	31.2383
0.628958	0.24	0.628958	30.4201
0.629914	0.23913	0.629914	30.4201
0.633291	0.292035	0.633291	30.8298
0.639758	0.285714	0.639758	30.8298
0.641316	0.284211	0.641316	30.8298
0.644087	0.281553	0.644087	30.8298
0.645718	0.28	0.645718	30.8298
0.647055	0.333333	0.647055	31.2383
0.647055	0.333333	0.647055	31.2383
0.64746	0.278351	0.64746	30.8298
0.64746	0.278351	0.64746	30.8298
0.650236	0.221239	0.650236	30.4201
0.652787	0.381443	0.652787	31.6455
0.653467	0.272727	0.653467	30.8298
0.653543	0.434343	0.653543	32.0515
0.656894	0.269565	0.656894	30.8298
0.660068	0.266667	0.660068	30.8298
0.66509	0.262136	0.66509	30.8298
0.66638	-0.060606	0.66638	28.3523
0.666507	0.26087	0.666507	30.8298
0.667276	0.313131	0.667276	31.2383
0.667484	0.26	0.667484	30.8298
0.667928	0.3125	0.667928	31.2383
0.668624	0.311828	0.668624	31.2383
0.67459	0.306122	0.67459	31.2383
0.675744	0.252747	0.675744	30.8298
0.676322	0.147287	0.676322	30.0091
0.678927	0.25	0.678927	30.8298
0.678927	0.25	0.678927	30.8298
0.678927	0.25	0.678927	30.8298
0.678927	0.25	0.678927	30.8298
0.681607	0.247706	0.681607	30.8298
0.68207	0.247312	0.68207	30.8298
0.682221	0.298969	0.682221	31.2383
0.686025	0.192308	0.686025	30.4201
0.687509	0.242718	0.687509	30.8298
0.688801	0.292929	0.688801	31.2383
0.69168	0.290323	0.69168	31.2383
0.692966	0.34	0.692966	31.6455
0.696829	0.285714	0.696829	31.2383
0.698526	0.284211	0.698526	31.2383
0.700544	0.232	0.700544	30.8298
0.703321	0.28	0.703321	31.2383
0.707341	0.326316	0.707341	31.6455
0.707717	0.27619	0.707717	31.2383
0.708304	0.225806	0.708304	30.8298
0.709422	0.274725	0.709422	31.2383
0.711761	0.272727	0.711761	31.2383
0.711761	0.272727	0.711761	31.2383
0.712873	0.222222	0.712873	30.8298
0.716383	0.268817	0.716383	31.2383
0.717824	0.218391	0.717824	30.8298
0.720584	0.265306	0.720584	31.2383
0.721767	0.313131	0.721767	31.6455
0.72318	0.263158	0.72318	31.2383
0.729678	0.306122	0.729678	31.6455
0.729818	0.257732	0.729818	31.2383
0.73066	0.305263	0.73066	31.6455
0.73066	0.305263	0.73066	31.6455
0.731063	0.352941	0.731063	32.0515
0.733483	0.206612	0.733483	30.8298
0.737952	0.346535	0.737952	32.0515
0.74505	0.292929	0.74505	31.6455
0.747461	0.290909	0.747461	31.6455
0.748164	0.290323	0.748164	31.6455
0.749637	0.242105	0.749637	31.2383
0.752224	0.286957	0.752224	31.6455
0.75239	0.24	0.75239	31.2383
0.761948	0.186441	0.761948	30.8298
0.768409	0.319588	0.768409	32.0515
0.771489	0.225806	0.771489	31.2383
0.772298	0.270833	0.772298	31.6455
0.77331	0.22449	0.77331	31.2383
0.779429	0.265306	0.779429	31.6455
0.78308	0.172414	0.78308	30.8298
0.78571	0.215686	0.78571	31.2383
0.787382	0.259259	0.787382	31.6455
0.790845	0.212121	0.790845	31.2383
0.792174	0.3	0.792174	32.0515
0.792174	0.3	0.792174	32.0515
0.793215	0.254902	0.793215	31.6455
0.793215	0.254902	0.793215	31.6455
0.796911	0.252174	0.796911	31.6455
0.799304	0.206349	0.799304	31.2383
0.803289	0.247525	0.803289	31.6455
0.806874	0.288462	0.806874	32.0515
0.806938	0.244898	0.806938	31.6455
0.810854	0.242105	0.810854	31.6455
0.813832	0.24	0.813832	31.6455
0.829386	0.101449	0.829386	30.4201
0.829919	0.186441	0.829919	31.2383
0.830417	0.270833	0.830417	32.0515
0.83164	0.227723	0.83164	31.6455
0.833084	0.184466	0.833084	31.2383
0.835265	0.267327	0.835265	32.0515
0.83578	0.182796	0.83578	31.2383
0.83646	0.22449	0.83646	31.6455
0.839874	0.222222	0.839874	31.6455
0.843985	0.177778	0.843985	31.2383
0.848623	0.216495	0.848623	31.6455
0.85182	0.173077	0.85182	31.2383
0.852907	0.254902	0.852907	32.0515
0.852907	0.254902	0.852907	32.0515
0.860074	0.25	0.860074	32.0515
0.862662	0.207547	0.862662	31.6455
0.867663	0.244898	0.867663	32.0515
0.870946	0.242718	0.870946	32.0515
0.872877	0.281553	0.872877	32.4562
0.880557	0.27619	0.880557	32.4562
0.882318	0.235294	0.882318	32.0515
0.882679	0.274725	0.882679	32.4562
0.885588	0.272727	0.885588	32.4562
0.889056	0.191489	0.889056	31.6455
0.893553	0.149425	0.893553	31.2383
0.894224	0.227723	0.894224	32.0515
0.898223	0.225225	0.898223	32.0515
0.8983	0.264151	0.8983	32.4562
0.898729	0.185841	0.898729	31.6455
0.898729	0.185841	0.898729	31.6455
0.899407	0.22449	0.899407	32.0515
0.899866	0.185185	0.899866	31.6455
0.901328	0.223301	0.901328	32.0515
0.90134	0.262136	0.90134	32.4562
0.912424	0.254902	0.912424	32.4562
0.920092	0.25	0.920092	32.4562
0.921681	0.211009	0.921681	32.0515
0.923916	-0.058824	0.923916	29.1833
0.924013	0.247525	0.924013	32.4562
0.931722	0.242718	0.931722	32.4562
0.940706	0.2	0.940706	32.0515
0.940706	0.2	0.940706	32.0515
0.940706	0.2	0.940706	32.0515
0.963283	0.1875	0.963283	32.0515
0.963417	0.26	0.963417	32.8598
0.971767	0.254902	0.971767	32.8598
0.974179	0.145631	0.974179	31.6455
0.97616	0.216495	0.97616	32.4562
0.978905	0.214953	0.978905	32.4562
0.979933	0.25	0.979933	32.8598
0.983127	0.212598	0.983127	32.4562
0.983304	0.248	0.983304	32.8598
0.997025	0.24	0.997025	32.8598
0.999076	0.203883	0.999076	32.4562
1.00635	0.2	1.00635	32.4562
1.00635	0.2	1.00635	32.4562
1.01056	0.232323	1.01056	32.8598
1.01056	0.232323	1.01056	32.8598
1.01334	0.230769	1.01334	32.8598
1.01588	0.229358	1.01588	32.8598
1.01884	0.227723	1.01884	32.8598
1.01884	0.227723	1.01884	32.8598
1.03654	0.184466	1.03654	32.4562
1.03959	0.25	1.03959	33.2621
1.04563	0.112903	1.04563	31.6455
1.04771	0.178947	1.04771	32.4562
1.04984	0.111111	1.04984	31.6455
1.05012	0.211009	1.05012	32.8598
1.05386	0.242105	1.05386	33.2621
1.05985	0.173077	1.05985	32.4562
1.06118	0.270833	1.06118	33.6633
1.06648	0.235294	1.06648	33.2621
1.06958	0.233645	1.06958	33.2621
1.07503	0.230769	1.07503	33.2621
1.07974	0.196078	1.07974	32.8598
1.08087	0.227723	1.08087	33.2621
1.08394	0.19403	1.08394	32.8598
1.09261	0.157895	1.09261	32.4562
1.093	0.189655	1.093	32.8598
1.09785	0.219048	1.09785	33.2621
1.09908	0.25	1.09908	33.6633
1.1115	0.180952	1.1115	32.8598
1.11681	0.240741	1.11681	33.6633
1.11825	0.24	1.11825	33.6633
1.12041	0.207921	1.12041	33.2621
1.12878	0.173077	1.12878	32.8598
1.12884	0.203883	1.12884	33.2621
1.12956	0.20354	1.12956	33.2621
1.13026	0.172414	1.13026	32.8598
1.13305	0.171171	1.13305	32.8598
1.13705	0.2	1.13705	33.2621
1.15369	0.192308	1.15369	33.2621
1.15377	0.252336	1.15377	34.0633
1.16867	0.125926	1.16867	32.4562
1.16954	0.185185	1.16954	33.2621
1.17666	0.122807	1.17666	32.4562
1.17825	-0.087719	1.17825	29.5969
1.18253	0.238095	1.18253	34.0633
1.18953	0.176471	1.18953	33.2621
1.19785	0.172932	1.19785	33.2621
1.2072	0.226415	1.2072	34.0633
1.2233	0.219048	1.2233	34.0633
1.22819	0.188679	1.22819	33.6633
1.22925	0.16	1.22925	33.2621
1.23152	0.159091	1.23152	33.2621
1.23257	0.130435	1.23257	32.8598
1.23712	0.156863	1.23712	33.2621
1.23939	0.155963	1.23939	33.2621
1.24137	0.211009	1.24137	34.0633
1.24906	0.152174	1.24906	33.2621
1.25082	0.206897	1.25082	34.0633
1.27081	0.171171	1.27081	33.6633
1.28467	0.192661	1.28467	34.0633
1.29459	0.161905	1.29459	33.6633
1.31788	0.153153	1.31788	33.6633
1.32205	0.203883	1.32205	34.4621
1.3311	0.174312	1.3311	34.0633
1.34172	0.118644	1.34172	33.2621
1.35026	0.192661	1.35026	34.4621
1.35337	0.114754	1.35337	33.2621
1.36045	0.137931	1.36045	33.6633
1.36056	0.188679	1.36056	34.4621
1.39563	0.12605	1.39563	33.6633
1.43403	0.089552	1.43403	33.2621
1.44545	0.181818	1.44545	34.8598
1.45957	0.12963	1.45957	34.0633
1.46613	0.080292	1.46613	33.2621
1.52908	0.131148	1.52908	34.4621
1.52908	0.131148	1.52908	34.4621
1.53713	0.128713	1.53713	34.4621
1.57151	0.140496	1.57151	34.8598
1.5968	0.154472	1.5968	35.2563
1.66455	0.134615	1.66455	35.2563
1.67541	0.111111	1.67541	34.8598
1.82252	0.037433	1.82252	34.0633

## Sheet: ECI_NDVI2022
ECI2022	LST2022	ECI2022	NDVI2022
0.067207	25.3365	0.067207	0.430232
0.068624	25.2638	0.068624	0.363608
0.069521	25.339	0.069521	0.411597
0.071554	25.3633	0.071554	0.411944
0.072989	25.4336	0.072989	0.449227
0.074798	25.4216	0.074798	0.425711
0.076109	25.4168	0.076109	0.411974
0.079106	25.4241	0.079106	0.394107
0.079415	25.4605	0.079415	0.41516
0.07956	25.4847	0.07956	0.429568
0.081994	25.5114	0.081994	0.427883
0.082558	25.5114	0.082558	0.42371
0.082798	25.5284	0.082798	0.432379
0.083115	25.5453	0.083115	0.440412
0.083853	25.5187	0.083853	0.418752
0.085394	25.3952	0.085394	0.334229
0.085763	25.5672	0.085763	0.434079
0.085774	25.5284	0.085774	0.411016
0.086677	25.543	0.086677	0.413365
0.087032	25.5527	0.087032	0.416595
0.087299	25.5648	0.087299	0.421818
0.087998	25.5479	0.087998	0.407207
0.088133	25.4583	0.088133	0.354552
0.088146	25.5624	0.088146	0.414593
0.088482	25.5479	0.088482	0.403975
0.088984	25.5721	0.088984	0.414503
0.089152	25.5237	0.089152	0.385729
0.089333	25.5794	0.089333	0.416319
0.089559	25.635	0.089559	0.446425
0.089829	25.5794	0.089829	0.413004
0.090204	25.6737	0.090204	0.463764
0.090548	25.5624	0.090548	0.398728
0.090727	25.6109	0.090727	0.424745
0.09073	25.56	0.09073	0.396205
0.090771	25.6786	0.090771	0.462435
0.091052	25.4195	0.091052	0.315609
0.091261	25.5915	0.091261	0.410395
0.091376	25.6569	0.091376	0.446044
0.091785	25.5867	0.091785	0.404317
0.091946	25.6206	0.091946	0.422045
0.091958	25.5794	0.091958	0.399193
0.092086	25.6182	0.092086	0.419796
0.092884	25.6085	0.092884	0.409301
0.093344	25.5286	0.093344	0.362805
0.093566	25.6303	0.093566	0.416835
0.093837	25.6448	0.093837	0.422974
0.093898	25.6399	0.093898	0.419932
0.094044	25.5988	0.094044	0.396741
0.094428	25.6545	0.094428	0.424401
0.094442	25.6109	0.094442	0.400817
0.094447	25.6472	0.094447	0.420354
0.094502	25.698	0.094502	0.44735
0.094603	25.6303	0.094603	0.410258
0.09479	25.6254	0.09479	0.406461
0.094909	25.6569	0.094909	0.422613
0.094949	25.64	0.094949	0.413254
0.09501	25.6351	0.09501	0.410291
0.095018	25.7537	0.095018	0.473733
0.095457	25.6521	0.095457	0.416532
0.095459	25.7029	0.095459	0.443607
0.095564	25.6109	0.095564	0.393958
0.096021	25.6328	0.096021	0.402764
0.096172	25.6545	0.096172	0.413377
0.096285	25.6328	0.096285	0.401155
0.096501	25.7077	0.096501	0.439393
0.096536	25.6787	0.096536	0.423869
0.096575	25.6425	0.096575	0.404506
0.096693	25.7319	0.096693	0.450897
0.096705	25.6425	0.096705	0.403718
0.09672	25.6497	0.09672	0.407427
0.096753	25.6956	0.096753	0.431403
0.096899	25.7077	0.096899	0.436835
0.09695	25.6666	0.09695	0.414924
0.097178	25.6836	0.097178	0.422376
0.097276	25.6376	0.097276	0.397718
0.097315	25.6691	0.097315	0.413951
0.097429	25.6981	0.097429	0.428396
0.097433	25.6134	0.097433	0.384139
0.097437	25.6981	0.097437	0.428349
0.097718	25.6546	0.097718	0.403934
0.097809	25.6521	0.097809	0.402102
0.097831	25.6981	0.097831	0.425882
0.097973	25.6642	0.097973	0.407407
0.098076	25.6376	0.098076	0.392976
0.098215	25.6957	0.098215	0.422249
0.098241	25.686	0.098241	0.417072
0.098241	25.7537	0.098241	0.452174
0.098553	25.6497	0.098553	0.396439
0.098562	25.6763	0.098562	0.410124
0.0987	25.6763	0.0987	0.409296
0.098799	25.7078	0.098799	0.424906
0.098806	25.4439	0.098806	0.2889
0.098847	25.6739	0.098847	0.407171
0.098942	25.6473	0.098942	0.392918
0.098988	25.715	0.098988	0.427473
0.099191	25.6836	0.099191	0.41008
0.099336	25.6812	0.099336	0.407982
0.099451	25.7175	0.099451	0.425861
0.099494	25.6933	0.099494	0.413235
0.099666	25.7127	0.099666	0.42209
0.099802	25.7199	0.099802	0.424961
0.099998	25.7006	0.099998	0.413921
0.100115	25.6909	0.100115	0.408305
0.100157	25.7271	0.100157	0.426474
0.100168	25.7006	0.100168	0.412907
0.100292	25.7127	0.100292	0.418308
0.100332	25.703	0.100332	0.413151
0.100357	25.6497	0.100357	0.386008
0.100417	25.6788	0.100417	0.400394
0.100518	25.7199	0.100518	0.420629
0.101026	25.7078	0.101026	0.411495
0.101067	25.7441	0.101067	0.429517
0.101087	25.6812	0.101087	0.397732
0.101102	25.7272	0.101102	0.420773
0.101222	25.7054	0.101222	0.409132
0.10128	25.6933	0.10128	0.402707
0.101296	25.7054	0.101296	0.408694
0.101315	25.7248	0.101315	0.418296
0.101336	25.7175	0.101336	0.414527
0.101492	25.7127	0.101492	0.411193
0.101516	25.519	0.101516	0.313948
0.101611	25.807	0.101611	0.457719
0.101643	25.7997	0.101643	0.453882
0.101669	25.7369	0.101669	0.422257
0.101725	25.7514	0.101725	0.429183
0.10224	25.7489	0.10224	0.42488
0.10225	25.7465	0.10225	0.423626
0.102303	25.6982	0.102303	0.399244
0.102324	25.5844	0.102324	0.342543
0.102445	25.778	0.102445	0.438099
0.102548	25.7224	0.102548	0.409864
0.10259	25.7297	0.10259	0.413233
0.102617	25.6788	0.102617	0.387873
0.102812	25.7635	0.102812	0.428697
0.103001	25.836	0.103001	0.46339
0.103037	25.7151	0.103037	0.403464
0.103201	25.6861	0.103201	0.388199
0.103208	25.7562	0.103208	0.422754
0.103224	25.7562	0.103224	0.422663
0.103366	25.703	0.103366	0.395635
0.103454	25.7611	0.103454	0.423696
0.103532	25.7442	0.103532	0.414924
0.103695	25.7659	0.103695	0.424662
0.10392	25.7393	0.10392	0.410312
0.103937	25.7224	0.103937	0.401929
0.10397	25.7539	0.10397	0.417143
0.104192	25.7103	0.104192	0.3946
0.104197	25.7949	0.104197	0.435893
0.104416	25.7562	0.104416	0.41574
0.104689	25.7127	0.104689	0.39303
0.104725	25.7562	0.104725	0.413969
0.104997	25.7539	0.104997	0.411272
0.105088	25.7466	0.105088	0.407225
0.105191	25.8046	0.105191	0.43473
0.105225	25.7321	0.105225	0.399454
0.10526	25.8094	0.10526	0.436655
0.105351	25.7781	0.105351	0.420952
0.105452	25.7152	0.105452	0.390016
0.105499	25.7345	0.105499	0.3991
0.105609	25.8191	0.105609	0.43926
0.105651	25.7563	0.105651	0.408733
0.105662	25.7418	0.105662	0.401699
0.105669	25.7442	0.105669	0.402815
0.105719	25.766	0.105719	0.413019
0.105755	25.7732	0.105755	0.416306
0.105771	25.7781	0.105771	0.418548
0.105911	25.7393	0.105911	0.399146
0.106201	25.7442	0.106201	0.399881
0.106274	25.7128	0.106274	0.384425
0.106375	25.7442	0.106375	0.398927
0.106401	25.7732	0.106401	0.412666
0.106745	25.7418	0.106745	0.395755
0.106786	25.7539	0.106786	0.401306
0.10692	25.7756	0.10692	0.41092
0.107066	25.8312	0.107066	0.436541
0.10717	25.7781	0.10717	0.41069
0.107282	25.7611	0.107282	0.402027
0.107406	25.7998	0.107406	0.419682
0.107447	25.7926	0.107447	0.416017
0.107488	25.7998	0.107488	0.419223
0.107502	25.8288	0.107502	0.43287
0.107544	25.7757	0.107544	0.407471
0.107561	25.7708	0.107561	0.405097
0.107728	25.8167	0.107728	0.425874
0.107786	25.7974	0.107786	0.416418
0.107824	25.7466	0.107824	0.392234
0.107854	25.766	0.107854	0.401209
0.10786	25.7732	0.10786	0.404602
0.108039	25.7757	0.108039	0.404762
0.108055	25.7829	0.108055	0.408088
0.108191	25.7878	0.108191	0.409629
0.108218	25.7781	0.108218	0.404934
0.108234	25.7757	0.108234	0.403701
0.108568	25.7539	0.108568	0.391704
0.108607	25.7998	0.108607	0.413013
0.108608	25.795	0.108608	0.410735
0.108795	25.7926	0.108795	0.408588
0.108854	25.8119	0.108854	0.417305
0.108908	25.8385	0.108908	0.429442
0.108938	25.7612	0.108938	0.393122
0.109114	25.766	0.109114	0.394457
0.10915	25.7974	0.10915	0.40892
0.109191	25.6717	0.109191	0.350074
0.109296	25.7588	0.109296	0.390129
0.109465	25.8119	0.109465	0.413951
0.109502	25.8288	0.109502	0.421613
0.109552	25.7685	0.109552	0.393279
0.109601	25.8144	0.109601	0.414343
0.109637	25.8119	0.109637	0.413012
0.109776	25.8168	0.109776	0.414502
0.109782	25.8289	0.109782	0.420067
0.110027	25.7854	0.110027	0.398597
0.110045	25.8289	0.110045	0.418626
0.110183	25.795	0.110183	0.402241
0.110408	25.8095	0.110408	0.407735
0.110425	25.7491	0.110425	0.379776
0.110548	25.7709	0.110548	0.389189
0.110569	25.8144	0.110569	0.409107
0.110581	25.8047	0.110581	0.404591
0.110642	25.8144	0.110642	0.408713
0.110673	25.8506	0.110673	0.425218
0.110708	25.7781	0.110708	0.391698
0.110736	25.7733	0.110736	0.389323
0.110776	25.7854	0.110776	0.394661
0.110824	25.7926	0.110824	0.397742
0.110886	25.8651	0.110886	0.430697
0.110918	25.8192	0.110918	0.409453
0.110937	25.8192	0.110937	0.40935
0.111061	25.812	0.111061	0.405359
0.11116	25.7926	0.11116	0.395989
0.111206	25.795	0.111206	0.39685
0.111275	25.8579	0.111275	0.42523
0.111444	25.7926	0.111444	0.394508
0.11158	25.8168	0.11158	0.40483
0.111585	25.8072	0.111585	0.400401
0.111676	25.8337	0.111676	0.41204
0.111807	25.7951	0.111807	0.393727
0.111821	25.8458	0.111821	0.416759
0.111868	25.8096	0.111868	0.400018
0.111907	25.8072	0.111907	0.398717
0.111941	25.8241	0.111941	0.406233
0.111965	25.7951	0.111965	0.392915
0.111984	25.8192	0.111984	0.403802
0.112082	25.8265	0.112082	0.406585
0.112121	25.7854	0.112121	0.387726
0.112166	25.7733	0.112166	0.382014
0.112177	25.8217	0.112177	0.403899
0.112195	25.841	0.112195	0.412575
0.112372	25.8386	0.112372	0.410542
0.112522	25.8096	0.112522	0.396621
0.11254	25.8555	0.11254	0.417297
0.11257	25.8555	0.11257	0.417136
0.112796	25.8048	0.112796	0.393039
0.112806	25.7999	0.112806	0.390802
0.112817	25.7757	0.112817	0.379838
0.11305	25.8168	0.11305	0.39718
0.113052	25.841	0.113052	0.408057
0.113159	25.8386	0.113159	0.406414
0.113191	25.8555	0.113191	0.413842
0.113242	25.8314	0.113242	0.402719
0.113355	25.8289	0.113355	0.401037
0.113377	25.8338	0.113377	0.4031
0.11341	25.841	0.11341	0.406185
0.113427	25.8048	0.113427	0.389834
0.1135	25.8483	0.1135	0.408973
0.113638	25.8241	0.113638	0.397426
0.113715	25.8772	0.113715	0.420813
0.113767	25.87	0.113767	0.417294
0.113768	25.5846	0.113768	0.289591
0.113831	25.8338	0.113831	0.400761
0.113896	25.1137	0.113896	0.07862
0.113898	25.6282	0.113898	0.308537
0.113967	25.928	0.113967	0.442134
0.113971	25.8603	0.113971	0.411901
0.114257	25.9087	0.114257	0.431949
0.114268	25.8603	0.114268	0.410352
0.114359	25.8434	0.114359	0.402363
0.114361	25.9401	0.114361	0.445351
0.114653	25.87	0.114653	0.412651
0.114683	25.8676	0.114683	0.411424
0.114697	25.8676	0.114697	0.41135
0.114757	25.8579	0.114757	0.406753
0.114832	25.8483	0.114832	0.402099
0.114836	25.8507	0.114836	0.403147
0.114856	25.8314	0.114856	0.394477
0.114941	25.8048	0.114941	0.382274
0.114964	25.8652	0.114964	0.408904
0.115254	25.8507	0.115254	0.401015
0.115352	25.8338	0.115352	0.393056
0.115352	25.8265	0.115352	0.389849
0.115395	25.8652	0.115395	0.406691
0.115468	25.8386	0.115468	0.394609
0.115673	25.858	0.115673	0.40208
0.115677	25.9642	0.115677	0.448808
0.115746	25.829	0.115746	0.388961
0.115824	25.8265	0.115824	0.387513
0.115951	25.9039	0.115951	0.420827
0.116065	25.8845	0.116065	0.411759
0.116102	25.899	0.116102	0.417919
0.116145	25.9304	0.116145	0.431445
0.116191	25.9256	0.116191	0.429104
0.116393	25.9135	0.116393	0.422745
0.116561	25.858	0.116561	0.397615
0.116617	25.8966	0.116617	0.414211
0.116665	25.8676	0.116665	0.401313
0.116723	25.8797	0.116723	0.406302
0.116833	25.9594	0.116833	0.440464
0.11688	25.8966	0.11688	0.412866
0.116904	25.9063	0.116904	0.416952
0.117014	25.887	0.117014	0.407977
0.11708	25.9135	0.11708	0.419189
0.117095	25.9015	0.117095	0.413875
0.117271	25.8894	0.117271	0.407725
0.117308	25.8773	0.117308	0.402303
0.11731	25.9063	0.11731	0.414872
0.117335	25.8652	0.117335	0.396927
0.117346	25.9787	0.117346	0.446093
0.117348	25.8773	0.117348	0.402101
0.117468	25.9401	0.117468	0.428719
0.117483	25.928	0.117483	0.423408
0.117514	25.928	0.117514	0.423249
0.117587	25.8749	0.117587	0.399871
0.117725	25.8822	0.117725	0.402323
0.117762	25.9594	0.117762	0.435539
0.117772	25.8942	0.117772	0.407305
0.117804	25.8894	0.117804	0.405052
0.117827	25.9836	0.117827	0.445614
0.117905	25.8918	0.117905	0.405587
0.117946	25.9015	0.117946	0.409566
0.117972	25.8701	0.117972	0.395874
0.117998	25.9063	0.117998	0.41138
0.118048	25.8532	0.118048	0.388218
0.118088	25.9111	0.118088	0.413002
0.118237	25.8846	0.118237	0.400819
0.118324	25.9015	0.118324	0.407667
0.118332	25.9401	0.118332	0.424245
0.11834	25.8749	0.11834	0.396154
0.118367	25.8942	0.118367	0.404333
0.11838	25.8652	0.11838	0.391803
0.11844	25.8846	0.11844	0.399817
0.118481	25.957	0.118481	0.430736
0.118812	25.9787	0.118812	0.438323
0.118814	25.9667	0.118814	0.433154
0.118908	25.9015	0.118908	0.404766
0.118938	25.9304	0.118938	0.416999
0.119079	25.9015	0.119079	0.40392
0.11914	25.9401	0.11914	0.420121
0.119195	25.9232	0.119195	0.412619
0.119213	25.7662	0.119213	0.345473
0.11924	25.8918	0.11924	0.398988
0.119265	25.9546	0.119265	0.425668
0.119412	25.8967	0.119412	0.400216
0.11942	25.9787	0.11942	0.435158
0.119425	25.9063	0.119425	0.404271
0.119426	25.9522	0.119426	0.423822
0.119444	25.9184	0.119444	0.409323
0.119507	25.8918	0.119507	0.397684
0.119609	25.8677	0.119609	0.386915
0.11961	25.8725	0.11961	0.388974
0.119658	25.8773	0.119658	0.390794
0.119667	25.9474	0.119667	0.420535
0.119673	25.9619	0.119673	0.426665
0.119744	25.9184	0.119744	0.407838
0.119758	26.0512	0.119758	0.464184
0.119775	26.0198	0.119775	0.450764
0.119796	25.8822	0.119796	0.392191
0.11982	25.8967	0.11982	0.398225
0.119912	25.9088	0.119912	0.402915
0.119926	25.9449	0.119926	0.418198
0.119935	25.9015	0.119935	0.399726
0.119952	25.8435	0.119952	0.375034
0.11998	25.9788	0.11998	0.43227
0.120047	25.8725	0.120047	0.386886
0.120072	25.8967	0.120072	0.397003
0.12017	25.9449	0.12017	0.416976
0.120222	25.7976	0.120222	0.354337
0.120383	25.9184	0.120383	0.404696
0.12039	25.9184	0.12039	0.404663
0.120398	25.9112	0.120398	0.401553
0.120498	25.8943	0.120498	0.393934
0.120636	25.9136	0.120636	0.401419
0.120673	25.8846	0.120673	0.389021
0.120815	25.9208	0.120815	0.403608
0.120818	26.0029	0.120818	0.438169
0.120909	25.9039	0.120909	0.396038
0.120909	25.9498	0.120909	0.415341
0.120985	25.9136	0.120985	0.399728
0.121061	25.788	0.121061	0.346544
0.121145	25.904	0.121145	0.39491
0.1212	25.9474	0.1212	0.412891
0.121285	25.9015	0.121285	0.393233
0.121422	25.974	0.121422	0.422934
0.121483	25.9233	0.121483	0.401387
0.121689	25.904	0.121689	0.392323
0.121715	25.8774	0.121715	0.381082
0.121741	25.9233	0.121741	0.400145
0.121805	25.9136	0.121805	0.395802
0.121912	25.9305	0.121912	0.402347
0.122039	25.9498	0.122039	0.409799
0.12206	25.974	0.12206	0.419766
0.122073	25.9547	0.122073	0.411654
0.122186	25.9836	0.122186	0.423167
0.122191	25.9643	0.122191	0.415091
0.122287	25.9909	0.122287	0.425674
0.122318	25.9402	0.122318	0.404432
0.122337	25.9016	0.122337	0.388267
0.122369	26.0246	0.122369	0.439319
0.122405	25.945	0.122405	0.406006
0.122583	25.9716	0.122583	0.416188
0.122684	25.9498	0.122684	0.406677
0.122719	25.9861	0.122719	0.421543
0.122752	25.9281	0.122752	0.397347
0.122801	25.9209	0.122801	0.394105
0.122807	25.9185	0.122807	0.393083
0.122855	25.9305	0.122855	0.397846
0.122908	25.9305	0.122908	0.397597
0.122926	25.9064	0.122926	0.387525
0.122986	25.9595	0.122986	0.40924
0.12306	25.9619	0.12306	0.409867
0.123184	25.9547	0.123184	0.406284
0.123221	25.9257	0.123221	0.394143
0.123255	25.9498	0.123255	0.40394
0.123277	25.9402	0.123277	0.399856
0.123326	26.003	0.123326	0.425525
0.123342	25.9668	0.123342	0.410508
0.123508	25.9692	0.123508	0.410705
0.123584	25.9136	0.123584	0.387456
0.123615	25.9474	0.123615	0.401239
0.123665	25.9185	0.123665	0.389076
0.123686	25.9643	0.123686	0.407855
0.123717	25.8847	0.123717	0.374926
0.123726	25.9547	0.123726	0.403697
0.123766	25.945	0.123766	0.399522
0.123868	25.9692	0.123868	0.408974
0.124211	25.9692	0.124211	0.407337
0.124331	25.9643	0.124331	0.404782
0.124354	25.9813	0.124354	0.411601
0.124409	25.9837	0.124409	0.412323
0.124456	25.9813	0.124456	0.411112
0.124529	26.0006	0.124529	0.418652
0.124591	26.0392	0.124591	0.434122
0.124594	26.003	0.124594	0.419324
0.12467	25.9499	0.12467	0.39727
0.12483	25.9402	0.12483	0.392597
0.12487	25.945	0.12487	0.394364
0.124892	25.9426	0.124892	0.393294
0.124895	25.9764	0.124895	0.407047
0.125178	25.9619	0.125178	0.39982
0.125182	25.9764	0.125182	0.405692
0.125193	26.0102	0.125193	0.419375
0.125235	26.0344	0.125235	0.42899
0.125283	25.9958	0.125283	0.413072
0.1254	25.9547	0.1254	0.395855
0.125451	25.9571	0.125451	0.396598
0.125516	25.9475	0.125516	0.392379
0.12566	25.9764	0.12566	0.403451
0.125824	25.9813	0.125824	0.404648
0.12603	25.9692	0.12603	0.39881
0.126075	25.9523	0.126075	0.39178
0.126096	25.9571	0.126096	0.393627
0.126098	26.0078	0.126098	0.414089
0.126112	26.0102	0.126112	0.414981
0.126241	25.9692	0.126241	0.397833
0.126278	26.0898	0.126278	0.446283
0.126364	26.0295	0.126364	0.42156
0.126368	26.0006	0.126368	0.409888
0.126527	26.0102	0.126527	0.413017
0.126586	26.0416	0.126586	0.425355
0.126634	26.0006	0.126634	0.40864
0.12664	25.9958	0.12664	0.406675
0.126678	25.9668	0.126678	0.394858
0.12668	25.9813	0.12668	0.400672
0.126687	25.9982	0.126687	0.407424
0.126784	25.945	0.126784	0.385637
0.126803	26.003	0.126803	0.408817
0.126968	25.9982	0.126968	0.406117
0.127047	25.9982	0.127047	0.405748
0.127073	25.962	0.127073	0.39112
0.127178	26.0175	0.127178	0.412855
0.127298	25.9934	0.127298	0.402662
0.12733	26.0464	0.12733	0.42372
0.127334	25.9668	0.127334	0.391879
0.127386	26.0272	0.127386	0.415753
0.127419	25.9378	0.127419	0.379912
0.127425	25.9765	0.127425	0.395319
0.127462	25.9789	0.127462	0.396112
0.127519	26.0054	0.127519	0.406453
0.127532	25.9934	0.127532	0.401583
0.127589	25.9233	0.127589	0.373384
0.12759	26.044	0.12759	0.421521
0.127622	25.9837	0.127622	0.397315
0.127686	25.9475	0.127686	0.382585
0.127807	25.9934	0.127807	0.400325
0.127815	26.0802	0.127815	0.434857
0.127891	26.0127	0.127891	0.407623
0.12801	26.0199	0.12801	0.409946
0.128037	26.0489	0.128037	0.421326
0.128131	25.9692	0.128131	0.389255
0.128135	26.1116	0.128135	0.445775
0.128194	25.9958	0.128194	0.399517
0.128283	25.991	0.128283	0.397189
0.128283	26.0199	0.128283	0.408682
0.128337	26.0537	0.128337	0.421831
0.128346	26.0175	0.128346	0.407424
0.128448	26.0199	0.128448	0.407923
0.128506	26.0537	0.128506	0.421034
0.128786	25.9837	0.128786	0.392065
0.128805	26.003	0.128805	0.399606
0.128816	25.9934	0.128816	0.395748
0.128849	26.0682	0.128849	0.425135
0.128859	26.0103	0.128859	0.402218
0.128923	26.0658	0.128923	0.423836
0.128966	25.8437	0.128966	0.335972
0.128968	26.0537	0.128968	0.418868
0.129027	26.0248	0.129027	0.407168
0.129072	25.9934	0.129072	0.394599
0.129119	26.0006	0.129119	0.397238
0.129215	26.0971	0.129215	0.43481
0.129321	26.0634	0.129321	0.421032
0.129354	26.0344	0.129354	0.409479
0.129407	26.0682	0.129407	0.422512
0.129509	26.0272	0.129509	0.405927
0.129642	26.0224	0.129642	0.403416
0.129792	26.032	0.129792	0.406531
0.129839	25.9886	0.129839	0.389285
0.129946	25.9982	0.129946	0.392598
0.129976	26.0465	0.129976	0.411356
0.129979	26.0127	0.129979	0.398121
0.130036	26.0465	0.130036	0.411079
0.130087	25.9934	0.130087	0.390086
0.130125	26.032	0.130125	0.405018
0.130248	26.0513	0.130248	0.412004
0.130304	26.0802	0.130304	0.423043
0.130317	26.1092	0.130317	0.434295
0.130362	26.0706	0.130362	0.419021
0.130386	26.073	0.130386	0.419839
0.130744	26.02	0.130744	0.397531
0.130903	25.991	0.130903	0.385562
0.130937	26.0344	0.130937	0.402306
0.130946	26.0971	0.130946	0.426631
0.131023	26.0827	0.131023	0.420659
0.13105	26.0489	0.13105	0.407414
0.131372	26.0538	0.131372	0.407841
0.131405	26.061	0.131405	0.410492
0.131419	26.02	0.131419	0.394544
0.131572	26.061	0.131572	0.409739
0.131575	26.0755	0.131575	0.415328
0.131612	25.7856	0.131612	0.303074
0.13166	26.0827	0.13166	0.417735
0.131701	26.061	0.131701	0.40916
0.131785	25.6744	0.131785	0.259451
0.13179	26.0996	0.13179	0.423668
0.131845	26.0321	0.131845	0.397337
0.131911	26.0393	0.131911	0.399837
0.131912	25.9862	0.131912	0.379359
0.131926	25.8292	0.131926	0.318707
0.132028	26.0923	0.132028	0.419773
0.132192	26.0561	0.132192	0.405089
0.132441	26.0345	0.132441	0.395649
0.132528	26.0803	0.132528	0.412858
0.132572	26.0634	0.132572	0.406197
0.132587	26.0465	0.132587	0.399635
0.132609	26.0369	0.132609	0.395837
0.13261	26.0321	0.13261	0.393987
0.132627	26.0899	0.132627	0.416121
0.132697	26.0827	0.132697	0.413033
0.132748	26.0465	0.132748	0.398929
0.132799	25.8582	0.132799	0.326518
0.132843	26.0658	0.132843	0.405904
0.132874	26.1334	0.132874	0.43164
0.132903	26.0899	0.132903	0.414876
0.132987	26.0755	0.132987	0.408969
0.133028	26.0296	0.133028	0.391236
0.133122	26.0224	0.133122	0.388068
0.133137	26.061	0.133137	0.402761
0.133165	26.0972	0.133165	0.41646
0.133174	26.0538	0.133174	0.399837
0.133245	26.102	0.133245	0.417955
0.133376	26.0369	0.133376	0.392505
0.133399	26.0489	0.133399	0.397003
0.133403	26.0465	0.133403	0.396065
0.133426	26.0635	0.133426	0.402423
0.133481	26.0224	0.133481	0.386527
0.133483	26.0465	0.133483	0.395716
0.133552	26.0803	0.133552	0.408282
0.133736	26.0707	0.133736	0.403812
0.133829	26.155	0.133829	0.435484
0.133897	26.1382	0.133897	0.428758
0.13398	26.0465	0.13398	0.393568
0.134024	26.0755	0.134024	0.404382
0.134045	26.1141	0.134045	0.418937
0.134076	25.7736	0.134076	0.289538
0.134091	26.0635	0.134091	0.399514
0.134122	26.0779	0.134122	0.404865
0.134178	26.0948	0.134178	0.41103
0.134181	26.1454	0.134181	0.430216
0.134193	26.1044	0.134193	0.414617
0.1342	26.0562	0.1342	0.396278
0.134272	26.0176	0.134272	0.381332
0.134297	26.1309	0.134297	0.424193
0.134426	26.0296	0.134426	0.385258
0.134452	26.0803	0.134452	0.40432
0.134472	25.8244	0.134472	0.307363
0.134487	26.0152	0.134487	0.379526
0.134523	26.0851	0.134523	0.405846
0.134573	26.0972	0.134573	0.41018
0.134758	26.0803	0.134758	0.402986
0.134781	26.0876	0.134781	0.405625
0.134821	26.0852	0.134821	0.404543
0.134933	26.1045	0.134933	0.411336
0.134984	26.2177	0.134984	0.453814
0.135009	26.1527	0.135009	0.429174
0.135122	26.1165	0.135122	0.415049
0.13521	26.0635	0.13521	0.394687
0.135295	26.0876	0.135295	0.403387
0.135392	26.0972	0.135392	0.406586
0.135461	25.8195	0.135461	0.301953
0.135542	26.1141	0.135542	0.412279
0.135557	26.0755	0.135557	0.397727
0.135647	26.1695	0.135647	0.432617
0.135648	26.1021	0.135648	0.407292
0.135813	26.131	0.135813	0.417409
0.135988	26.0586	0.135988	0.389562
0.136175	26.0803	0.136175	0.396879
0.136291	26.237	0.136291	0.454907
0.136343	26.1093	0.136343	0.406977
0.13637	26.1093	0.13637	0.406863
0.136399	26.02	0.136399	0.373428
0.13641	26.1623	0.13641	0.426474
0.136567	26.0586	0.136567	0.38713
0.136598	26.1647	0.136598	0.426533
0.136603	26.0586	0.136603	0.386982
0.136612	26.131	0.136612	0.413895
0.136632	25.9017	0.136632	0.328407
0.136711	26.1117	0.136711	0.406287
0.13675	26.0876	0.13675	0.397138
0.136999	26.09	0.136999	0.396978
0.137101	25.9331	0.137101	0.338309
0.137105	26.0755	0.137105	0.391161
0.137196	26.0997	0.137196	0.399729
0.13731	26.0924	0.13731	0.396554
0.137331	26.09	0.137331	0.395575
0.137352	26.131	0.137352	0.410673
0.137363	26.0852	0.137363	0.393652
0.137428	26.1166	0.137428	0.405001
0.13748	26.1479	0.13748	0.416374
0.13749	26.1141	0.13749	0.403833
0.137496	26.143	0.137496	0.414509
0.137644	26.0803	0.137644	0.390682
0.137665	26.1093	0.137665	0.401306
0.137708	26.1696	0.137708	0.423392
0.137808	26.1672	0.137808	0.422061
0.137925	26.1117	0.137925	0.40109
0.137933	26.0803	0.137933	0.389478
0.138131	26.1166	0.138131	0.402007
0.138183	26.0562	0.138183	0.379554
0.138201	26.09	0.138201	0.391926
0.138242	26.1407	0.138242	0.410404
0.138265	26.1334	0.138265	0.407644
0.138401	26.1551	0.138401	0.415027
0.13849	26.1648	0.13849	0.418193
0.138555	26.1744	0.138555	0.421451
0.13856	26.1551	0.13856	0.414338
0.138625	26.1117	0.138625	0.398137
0.138627	26.131	0.138627	0.405206
0.138654	26.1648	0.138654	0.417481
0.139324	26.0828	0.139324	0.384645
0.139358	26.1648	0.139358	0.414443
0.139436	26.1479	0.139436	0.407954
0.139453	26.172	0.139453	0.416685
0.139559	26.1985	0.139559	0.425894
0.139592	26.1214	0.139592	0.397621
0.139699	26.1069	0.139699	0.391908
0.139699	26.1479	0.139699	0.406842
0.139764	26.1166	0.139764	0.395162
0.139864	26.0539	0.139864	0.371917
0.139922	26.1576	0.139922	0.409403
0.139953	26.1696	0.139953	0.413653
0.140021	26.1045	0.140021	0.38971
0.140089	26.0949	0.140089	0.385927
0.140171	26.1576	0.140171	0.408351
0.140185	26.1142	0.140185	0.392534
0.14042	26.1287	0.14042	0.396821
0.140533	26.1335	0.140533	0.398101
0.140681	26.1455	0.140681	0.401844
0.140846	26.1648	0.140846	0.408123
0.140847	26.1069	0.140847	0.387214
0.1409	26.2708	0.1409	0.446196
0.140903	26.119	0.140903	0.39134
0.140917	26.1359	0.140917	0.397383
0.140938	26.0683	0.140938	0.372904
0.141029	26.1576	0.141029	0.40475
0.141071	26.1551	0.141071	0.403694
0.14108	26.2082	0.14108	0.422786
0.141125	26.1817	0.141125	0.413036
0.141127	26.1551	0.141127	0.40346
0.141262	26.1503	0.141262	0.401175
0.141313	26.1407	0.141313	0.397489
0.141389	26.1865	0.141389	0.413658
0.141449	26.1094	0.141449	0.38565
0.141473	26.1793	0.141473	0.4107
0.141482	26.2106	0.141482	0.421943
0.141509	26.1576	0.141509	0.402752
0.141583	26.0804	0.141583	0.374697
0.141705	26.1793	0.141705	0.409728
0.14172	26.1648	0.14172	0.404473
0.141756	26.1214	0.141756	0.388741
0.141784	26.1769	0.141784	0.408544
0.14185	26.1551	0.14185	0.400468
0.141882	26.1431	0.141882	0.396011
0.142023	26.1528	0.142023	0.398903
0.142026	26.1335	0.142026	0.391981
0.142342	26.1913	0.142342	0.411379
0.142428	26.1793	0.142428	0.406716
0.142457	26.2491	0.142457	0.431557
0.142483	26.1793	0.142483	0.406486
0.14252	26.16	0.14252	0.399452
0.142535	26.1841	0.142535	0.408001
0.142563	26.1865	0.142563	0.408734
0.142593	26.1721	0.142593	0.403465
0.142609	26.343	0.142609	0.46441
0.14281	26.1889	0.14281	0.408582
0.142916	26.0901	0.142916	0.372931
0.142978	26.1262	0.142978	0.385565
0.14298	26.1865	0.14298	0.407009
0.143003	26.213	0.143003	0.416347
0.143031	26.1576	0.143031	0.396511
0.143198	26.2034	0.143198	0.412112
0.143224	26.2227	0.143224	0.418852
0.14324	26.1624	0.14324	0.397373
0.143299	26.1672	0.143299	0.398845
0.1434	26.1552	0.1434	0.394151
0.143408	26.1672	0.143408	0.398403
0.143589	26.2106	0.143589	0.413054
0.143606	26.1938	0.143606	0.407005
0.143722	25.8825	0.143722	0.296283
0.143874	26.189	0.143874	0.404199
0.143896	26.2034	0.143896	0.409223
0.143928	26.1769	0.143928	0.39972
0.143982	26.1624	0.143982	0.394377
0.144058	26.2034	0.144058	0.408557
0.144171	26.2347	0.144171	0.419147
0.144364	26.1528	0.144364	0.389451
0.144511	26.1697	0.144511	0.394807
0.144547	26.2107	0.144547	0.409097
0.144604	26.1986	0.144604	0.404624
0.14462	26.2034	0.14462	0.406255
0.144699	26.1263	0.144699	0.378793
0.144881	26.1745	0.144881	0.395025
0.14489	26.2372	0.14489	0.417001
0.144913	26.0901	0.144913	0.365256
0.145001	25.9815	0.145001	0.326811
0.145164	26.0394	0.145164	0.346545
0.14529	26.2516	0.14529	0.42041
0.145412	26.1456	0.145412	0.382789
0.145511	26.2203	0.145511	0.40854
0.145558	26.1528	0.145558	0.38475
0.145564	26.2155	0.145564	0.406641
0.145583	26.2588	0.145583	0.421714
0.145641	26.1408	0.145641	0.380215
0.145688	26.2492	0.145688	0.417908
0.145711	26.1769	0.145711	0.392578
0.145983	26.2757	0.145983	0.425935
0.146065	26.1673	0.146065	0.387813
0.146217	26.1962	0.146217	0.39728
0.146366	26.2564	0.146366	0.417636
0.146461	26.2251	0.146461	0.406372
0.146462	26.3455	0.146462	0.448206
0.146624	26.2324	0.146624	0.408226
0.14664	26.2348	0.14664	0.408994
0.146641	25.9622	0.146641	0.314384
0.146656	26.3551	0.146656	0.450704
0.146658	26.2612	0.146658	0.418108
0.146703	26.3094	0.146703	0.434643
0.146899	26.2275	0.146899	0.405435
0.146912	26.2444	0.146912	0.411237
0.146956	26.1914	0.146956	0.39269
0.147023	26.2082	0.147023	0.398267
0.147197	26.2709	0.147197	0.419249
0.147332	26.2757	0.147332	0.420349
0.147587	26.2733	0.147587	0.418474
0.147661	26.1601	0.147661	0.379139
0.147712	26.2227	0.147712	0.400541
0.148049	26.2492	0.148049	0.408311
0.148223	26.2781	0.148223	0.417544
0.14826	26.2059	0.14826	0.392592
0.148263	26.1818	0.148263	0.3843
0.148413	26.2348	0.148413	0.401912
0.148492	26.2179	0.148492	0.39581
0.148524	26.3022	0.148524	0.424581
0.148551	26.2517	0.148551	0.407149
0.148719	26.283	0.148719	0.417187
0.148735	26.2757	0.148735	0.414651
0.148775	26.3335	0.148775	0.434261
0.148879	26.2107	0.148879	0.391843
0.148935	26.2589	0.148935	0.408085
0.149027	26.307	0.149027	0.424165
0.149139	26.1914	0.149139	0.38425
0.149229	26.2517	0.149229	0.404461
0.149423	26.2276	0.149423	0.39548
0.149467	26.295	0.149467	0.418283
0.149704	26.2661	0.149704	0.407509
0.149784	26.295	0.149784	0.417008
0.15004	26.3047	0.15004	0.419254
0.150059	26.23	0.150059	0.393853
0.150131	26.3528	0.150131	0.435202
0.150144	26.2613	0.150144	0.404134
0.150156	26.2998	0.150156	0.417152
0.15021	26.2685	0.15021	0.406323
0.150211	26.2613	0.150211	0.403871
0.150227	26.348	0.150227	0.433174
0.150236	26.1842	0.150236	0.377663
0.150357	26.307	0.150357	0.418785
0.150533	26.2806	0.150533	0.409131
0.15058	26.2998	0.15058	0.415461
0.150605	26.2758	0.150605	0.407219
0.150631	26.2613	0.150631	0.402233
0.150641	26.307	0.150641	0.417648
0.150706	26.3384	0.150706	0.427968
0.150784	26.2348	0.150784	0.392701
0.151065	26.2589	0.151065	0.399739
0.15115	26.283	0.15115	0.407522
0.1512	26.3119	0.1512	0.417047
0.151435	26.271	0.151435	0.40237
0.151495	26.3047	0.151495	0.413462
0.151609	26.2469	0.151609	0.393611
0.151668	26.348	0.151668	0.427313
0.151671	26.3287	0.151671	0.420841
0.151686	26.2252	0.151686	0.386039
0.151833	26.0443	0.151833	0.324858
0.151978	26.3071	0.151978	0.412357
0.152011	26.3071	0.152011	0.412231
0.152233	26.3023	0.152233	0.409759
0.152239	26.2493	0.152239	0.392015
0.152332	26.3239	0.152332	0.416608
0.152416	26.1625	0.152416	0.362378
0.152673	26.2493	0.152673	0.390379
0.152735	26.3312	0.152735	0.417433
0.152856	26.0926	0.152856	0.33752
0.153055	26.348	0.153055	0.421774
0.153275	26.3312	0.153275	0.415314
0.153418	26.2517	0.153418	0.388398
0.153421	26.3191	0.153421	0.410748
0.153589	26.1963	0.153589	0.369387
0.153722	26.3384	0.153722	0.415967
0.15383	26.3264	0.15383	0.411567
0.153891	26.2276	0.153891	0.37866
0.153937	26.3191	0.153937	0.408754
0.153982	26.2156	0.153982	0.374355
0.154001	26.2469	0.154001	0.384637
0.154044	26.3023	0.154044	0.402781
0.154195	26.348	0.154195	0.417297
0.154482	26.3408	0.154482	0.413808
0.154548	26.2806	0.154548	0.393726
0.154705	26.2397	0.154705	0.379675
0.154759	26.3216	0.154759	0.4064
0.155053	26.2493	0.155053	0.381562
0.155158	26.2276	0.155158	0.374066
0.155261	26.3384	0.155261	0.41002
0.155265	26.2903	0.155265	0.394218
0.155403	26.3432	0.155403	0.411043
0.155601	26.3432	0.155601	0.410288
0.155626	26.3264	0.155626	0.404697
0.155998	26.3866	0.155998	0.422914
0.156043	26.3914	0.156043	0.424313
0.15614	26.3529	0.15614	0.411377
0.156222	26.1288	0.156222	0.338078
0.156241	26.3336	0.156241	0.404723
0.156261	26.377	0.156261	0.418767
0.156285	26.3119	0.156285	0.397495
0.156307	26.3842	0.156307	0.420932
0.156463	26.4587	0.156463	0.444584
0.15647	26.3288	0.15647	0.402296
0.156613	26.3553	0.156613	0.410362
0.156796	26.3721	0.156796	0.415144
0.156949	26.3216	0.156949	0.398162
0.156982	26.1553	0.156982	0.344135
0.156995	26.3601	0.156995	0.410477
0.15701	26.3457	0.15701	0.405747
0.157079	26.2782	0.157079	0.383638
0.157084	26.4226	0.157084	0.43041
0.157142	26.4203	0.157142	0.429413
0.157164	26.3721	0.157164	0.413743
0.157289	26.2999	0.157289	0.389897
0.157379	26.3096	0.157379	0.392685
0.158035	26.312	0.158035	0.391058
0.158099	26.4203	0.158099	0.425701
0.158418	26.3312	0.158418	0.395861
0.158447	24.9969	0.158447	-0.032875
0.158491	25.9309	0.158491	0.267026
0.158697	26.1264	0.158697	0.329152
0.158854	26.3481	0.158854	0.399665
0.158992	26.2975	0.158992	0.38298
0.159123	26.3601	0.159123	0.402532
0.159161	26.3144	0.159161	0.387772
0.159233	26.4179	0.159233	0.420581
0.159354	26.3866	0.159354	0.410138
0.159414	26.4443	0.159414	0.428347
0.159415	26.3746	0.159415	0.406061
0.15946	26.3938	0.15946	0.412037
0.159664	26.3024	0.159664	0.382128
0.159682	26.4203	0.159682	0.419658
0.159706	26.3673	0.159706	0.402684
0.159722	26.0348	0.159722	0.296647
0.159943	26.2229	0.159943	0.355846
0.160011	26.4323	0.160011	0.422232
0.160193	26.312	0.160193	0.383314
0.160301	26.3072	0.160301	0.3814
0.16045	26.3457	0.16045	0.393103
0.160498	26.4636	0.160498	0.430313
0.1605	25.9261	0.1605	0.25986
0.160872	26.4227	0.160872	0.415945
0.161138	26.4107	0.161138	0.41115
0.161183	26.2132	0.161183	0.348642
0.161645	26.3722	0.161645	0.397174
0.16181	26.4227	0.16181	0.412469
0.161811	26.4516	0.161811	0.421549
0.161812	26.3842	0.161812	0.400355
0.16189	26.6126	0.16189	0.471871
0.162101	26.4612	0.162101	0.423475
0.162232	26.3553	0.162232	0.389779
0.162455	26.4011	0.162455	0.403317
0.162545	26.4107	0.162545	0.405999
0.162683	26.4805	0.162683	0.427334
0.162732	26.4203	0.162732	0.408346
0.162756	26.3361	0.162756	0.381914
0.162772	26.3625	0.162772	0.390126
0.162923	26.1458	0.162923	0.321872
0.162944	26.4107	0.162944	0.404557
0.16298	26.0734	0.16298	0.299089
0.16315	26.4035	0.16315	0.401578
0.163278	26.3915	0.163278	0.397363
0.163278	26.3024	0.163278	0.3696
0.163424	26.3096	0.163424	0.371356
0.163491	26.4564	0.163491	0.41682
0.163635	26.3626	0.163635	0.3871
0.163726	26.2831	0.163726	0.362093
0.163972	26.4059	0.163972	0.399381
0.164269	26.4516	0.164269	0.412493
0.164534	26.4757	0.164534	0.418964
0.164544	26.2109	0.164544	0.337026
0.165515	26.4973	0.165515	0.422043
0.165641	26.5189	0.165641	0.428225
0.165835	26.0975	0.165835	0.298176
0.165895	26.4709	0.165895	0.412549
0.16613	24.9921	0.16613	-0.041372
0.166295	25.6116	0.166295	0.148108
0.166366	26.4733	0.166366	0.411588
0.166541	26.4036	0.166541	0.389655
0.166544	26.4155	0.166544	0.393307
0.166731	26.3723	0.166731	0.379447
0.166772	26.3915	0.166772	0.385182
0.16733	26.4107	0.16733	0.38913
0.167527	26.4348	0.167527	0.395778
0.16764	26.5214	0.16764	0.421659
0.167722	26.4324	0.167722	0.394363
0.167725	26.4973	0.167725	0.414058
0.16778	26.5334	0.16778	0.424799
0.167782	26.4589	0.167782	0.402187
0.167852	26.4901	0.167852	0.411423
0.167943	26.1603	0.167943	0.311131
0.168022	26.5118	0.168022	0.41737
0.16845	26.4228	0.16845	0.388959
0.168596	26.4901	0.168596	0.408796
0.168839	26.4853	0.168839	0.40649
0.168951	26.4228	0.168951	0.387261
0.169068	26.4348	0.169068	0.390493
0.169109	26.43	0.169109	0.388904
0.169379	26.4373	0.169379	0.390161
0.170041	26.5646	0.170041	0.426052
0.170265	26.4709	0.170265	0.397241
0.170525	26.4902	0.170525	0.402092
0.17058	26.4228	0.17058	0.381806
0.171004	26.4349	0.171004	0.383991
0.171316	26.4998	0.171316	0.40224
0.171354	26.4781	0.171354	0.395678
0.171538	26.4902	0.171538	0.398632
0.171566	26.5551	0.171566	0.417792
0.171729	26.418	0.171729	0.376593
0.1718	26.4974	0.1718	0.399873
0.171934	26.5551	0.171934	0.416501
0.172007	26.4854	0.172007	0.395617
0.172089	26.5166	0.172089	0.404586
0.172193	26.5142	0.172193	0.403518
0.17228	26.471	0.17228	0.390445
0.172302	26.4902	0.172302	0.396046
0.172328	26.4397	0.172328	0.381041
0.1725	26.5311	0.1725	0.40744
0.172971	26.1555	0.172971	0.295309
0.173079	26.5719	0.173079	0.417474
0.173306	26.4324	0.173306	0.375728
0.173417	26.644	0.173417	0.437455
0.173453	26.5311	0.173453	0.404193
0.173477	26.4373	0.173477	0.376599
0.173497	26.2736	0.173497	0.328509
0.173765	25.9769	0.173765	0.240814
0.173793	26.4084	0.173793	0.36712
0.174053	26.6055	0.174053	0.423936
0.174085	26.3723	0.174085	0.355645
0.174117	26.5551	0.174117	0.408974
0.174711	26.5238	0.174711	0.397849
0.17481	26.5551	0.17481	0.406623
0.175043	26.5383	0.175043	0.400941
0.175083	26.1989	0.175083	0.302154
0.175189	26.4589	0.175189	0.377405
0.176657	26.5863	0.176657	0.40944
0.176693	26.6296	0.176693	0.421778
0.176794	26.4638	0.176794	0.373696
0.179326	26.5071	0.179326	0.378099
0.179471	26.4975	0.179471	0.374918
0.179662	26.5431	0.179662	0.387269
0.17988	26.5888	0.17988	0.399498
0.17989	26.6272	0.17989	0.410332
0.180134	26.596	0.180134	0.400701
0.18083	26.584	0.18083	0.395077
0.180959	26.5311	0.180959	0.379796
0.181314	26.5696	0.181314	0.389481
0.181782	26.4782	0.181782	0.362423
0.181957	26.6584	0.181957	0.412311
0.181977	25.7497	0.181977	0.158063
0.182142	26.3291	0.182142	0.319658
0.182218	26.5648	0.182218	0.385289
0.182544	26.5744	0.182544	0.38696
0.182662	26.4229	0.182662	0.34438
0.182888	26.5456	0.182888	0.377857
0.183051	26.6129	0.183051	0.396066
0.183585	26.4975	0.183585	0.362394
0.184298	26.6657	0.184298	0.406725
0.184783	26.6585	0.184783	0.403189
0.185491	26.6681	0.185491	0.403584
0.185492	26.5432	0.185492	0.369314
0.185525	26.8888	0.185525	0.46402
0.185548	26.6321	0.185548	0.39353
0.186657	26.6729	0.186657	0.401229
0.186663	26.4302	0.186663	0.335023
0.186833	26.3339	0.186833	0.308323
0.187109	26.3195	0.187109	0.303663
0.187133	26.6633	0.187133	0.397128
0.18775	26.7185	0.18775	0.410184
0.187851	26.6465	0.187851	0.39035
0.187937	26.7041	0.187937	0.405685
0.188064	26.7281	0.188064	0.411785
0.189455	26.7473	0.189455	0.412573
0.1896	26.9487	0.1896	0.466176
0.189644	26.6993	0.189644	0.399093
0.19019	26.649	0.19019	0.383933
0.190769	26.7737	0.190769	0.415505
0.190865	26.2231	0.190865	0.268369
0.191727	26.076	0.191727	0.227278
0.192398	26.7882	0.192398	0.414239
0.19292	26.3869	0.19292	0.306757
0.193497	26.5817	0.193497	0.356531
0.193928	26.9535	0.193928	0.452918
0.19432	26.7114	0.19432	0.388202
0.194534	26.7522	0.194534	0.39825
0.194762	27.0206	0.194762	0.467711
0.194776	26.9008	0.194776	0.43637
0.195094	26.7762	0.195094	0.402843
0.196396	26.7018	0.196396	0.379669
0.196596	26.5265	0.196596	0.333698
0.19669	26.745	0.19669	0.390005
0.196734	26.2401	0.196734	0.259232
0.19718	26.4904	0.19718	0.322856
0.197247	26.805	0.197247	0.40386
0.197767	26.7162	0.197767	0.379468
0.198075	26.8458	0.198075	0.411877
0.198488	26.829	0.198488	0.406332
0.198671	26.8074	0.198671	0.400265
0.198687	26.8314	0.198687	0.406359
0.199509	26.7642	0.199509	0.386789
0.199821	26.8218	0.199821	0.400568
0.200155	26.3894	0.200155	0.289625
0.201577	26.7475	0.201577	0.376698
0.201943	26.5986	0.201943	0.338157
0.202317	26.7019	0.202317	0.363173
0.202508	26.7043	0.202508	0.363253
0.202798	26.7139	0.202798	0.364882
0.203464	26.7259	0.203464	0.366094
0.204154	26.98	0.204154	0.427586
0.204157	26.4833	0.204157	0.303734
0.204423	26.7619	0.204423	0.372467
0.20457	26.7643	0.20457	0.372666
0.204838	26.8434	0.204838	0.391602
0.205469	26.8938	0.205469	0.402303
0.208377	26.7763	0.208377	0.365431
0.208469	26.8866	0.208469	0.392117
0.20867	26.5939	0.20867	0.320151
0.209147	27.0183	0.209147	0.422303
0.209303	26.9729	0.209303	0.410799
0.209364	26.2955	0.209364	0.245951
0.209899	27.0232	0.209899	0.421301
0.21014	26.2425	0.21014	0.231526
0.211839	26.7931	0.211839	0.360482
0.213062	26.9154	0.213062	0.38656
0.214832	26.9058	0.214832	0.37959
0.214962	26.8147	0.214962	0.357677
0.214989	27.0495	0.214989	0.413196
0.215332	26.9298	0.215332	0.383948
0.215663	26.7955	0.215663	0.351388
0.215986	26.9873	0.215986	0.395771
0.216452	26.8603	0.216452	0.364666
0.216478	26.4159	0.216478	0.260116
0.216552	27.1883	0.216552	0.441493
0.217112	27.0089	0.217112	0.397823
0.217867	27.1883	0.217867	0.437718
0.218216	26.9322	0.218216	0.376994
0.218628	25.8491	0.218628	0.123765
0.218987	27.0783	0.218987	0.408963
0.219726	26.8172	0.219726	0.346489
0.220179	26.9011	0.220179	0.364791
0.221096	26.9251	0.221096	0.368037
0.222185	26.4545	0.222185	0.257531
0.222652	27.1979	0.222652	0.426547
0.226963	27.0401	0.226963	0.379545
0.228045	26.8197	0.228045	0.327669
0.228361	27.0281	0.228361	0.373427
0.22839	26.858	0.22839	0.335443
0.229446	27.1143	0.229446	0.389895
0.229482	27.0712	0.229482	0.38026
0.229901	27.1597	0.229901	0.398824
0.229988	27.1214	0.229988	0.39013
0.230294	27.143	0.230294	0.394127
0.23065	27.1597	0.23065	0.396931
0.230839	27.076	0.230839	0.377991
0.230945	26.9707	0.230945	0.354521
0.231054	26.1992	0.231054	0.184329
0.231759	26.7285	0.231759	0.299438
0.232033	27.0664	0.232033	0.373004
0.23256	27.2386	0.23256	0.409421
0.232795	27.0353	0.232795	0.364377
0.232922	27.2983	0.232922	0.421551
0.233319	27.0616	0.233319	0.368881
0.233562	25.3279	0.233562	-0.009521
0.233723	27.253	0.233723	0.409596
0.233838	27.3963	0.233838	0.440487
0.234061	27.2124	0.234061	0.399902
0.234115	27.3079	0.234115	0.420546
0.234117	27.2291	0.234117	0.403397
0.234473	27.2554	0.234473	0.408213
0.234807	27.1956	0.234807	0.394417
0.235361	27.143	0.235361	0.38168
0.235711	27.0018	0.235711	0.35035
0.238436	27.1646	0.238436	0.378976
0.239219	27.2578	0.239219	0.396968
0.239356	27.1096	0.239356	0.365119
0.239364	27.1909	0.239364	0.382391
0.240313	27.2817	0.240313	0.399385
0.240645	27.1431	0.240645	0.369255
0.241286	27.155	0.241286	0.370309
0.242576	25.2428	0.242576	-0.033871
0.242957	27.4464	0.242957	0.427543
0.243447	27.1	0.243447	0.353885
0.244318	26.5244	0.244318	0.232034
0.246354	27.2244	0.246354	0.37323
0.247227	27.0881	0.247227	0.343196
0.247608	25.1139	0.247608	-0.063436
0.247803	27.0737	0.247803	0.33902
0.247895	26.942	0.247895	0.311779
0.249909	27.4417	0.249909	0.409553
0.250613	27.0594	0.250613	0.33024
0.251169	27.2842	0.251169	0.374646
0.252839	27.3534	0.252839	0.384899
0.252962	27.6729	0.252962	0.448906
0.253478	25.1528	0.253478	-0.058424
0.253953	27.1288	0.253953	0.337382
0.254537	27.4155	0.254537	0.393512
0.25529	27.6087	0.25529	0.430324
0.255424	26.9397	0.255424	0.296685
0.255822	27.4561	0.255822	0.39869
0.255865	27.6635	0.255865	0.439838
0.256359	27.4919	0.256359	0.404568
0.256596	27.4466	0.256596	0.395032
0.257209	27.4275	0.257209	0.38987
0.257866	27.4251	0.257866	0.387938
0.257886	27.2221	0.257886	0.34783
0.258652	27.6373	0.258652	0.427957
0.260514	27.48	0.260514	0.392848
0.262247	27.2771	0.262247	0.349648
0.262581	27.0953	0.262581	0.313743
0.263493	27.2341	0.263493	0.338813
0.263544	27.4084	0.263544	0.37239
0.263581	27.2365	0.263581	0.339104
0.264589	27.4418	0.264589	0.376614
0.266056	27.4872	0.266056	0.382201
0.266201	27.2174	0.266201	0.330296
0.267805	27.5706	0.267805	0.394357
0.268207	27.3464	0.268207	0.350931
0.268473	25.2987	0.268473	-0.037804
0.268723	27.2126	0.268723	0.324566
0.268859	27.4586	0.268859	0.370878
0.269603	27.3751	0.269603	0.353574
0.270786	26.7455	0.270786	0.232885
0.27136	27.5897	0.27136	0.390354
0.272015	27.5206	0.272015	0.376041
0.27218	27.5135	0.27218	0.374366
0.274218	27.4968	0.274218	0.36711
0.274678	26.2861	0.274678	0.141851
0.277082	27.7517	0.277082	0.408235
0.278841	26.409	0.278841	0.159404
0.279162	27.6017	0.279162	0.376468
0.27941	27.0285	0.27941	0.271545
0.280069	27.368	0.280069	0.332175
0.281274	26.8055	0.281274	0.228185
0.281758	27.5469	0.281758	0.361403
0.285398	27.3083	0.285398	0.311888
0.287028	27.5517	0.287028	0.352236
0.28835	27.5613	0.28835	0.351456
0.288691	27.5851	0.288691	0.355025
0.289037	27.2223	0.289037	0.290488
0.289142	27.2438	0.289142	0.294102
0.289349	27.9848	0.289349	0.424113
0.289785	27.8588	0.289785	0.401069
0.290183	27.6399	0.290183	0.361864
0.291132	27.9064	0.291132	0.406677
0.291626	26.3223	0.291626	0.129197
0.291737	27.4635	0.291737	0.32818
0.29648	27.5685	0.29648	0.337992
0.297133	27.5375	0.297133	0.33154
0.298845	27.7257	0.298845	0.360636
0.299244	27.8185	0.299244	0.375697
0.300096	27.8042	0.300096	0.371687
0.301269	27.8066	0.301269	0.369924
0.302688	28.087	0.302688	0.414476
0.302726	27.3132	0.302726	0.284289
0.304113	28.0561	0.304113	0.406503
0.308005	27.859	0.308005	0.366449
0.308095	27.6448	0.308095	0.330903
0.308259	27.5876	0.308259	0.321187
0.308475	28.0348	0.308475	0.39463
0.308704	27.84	0.308704	0.362073
0.309286	27.6376	0.309286	0.327745
0.310333	28.125	0.310333	0.405954
0.310637	27.7282	0.310637	0.340348
0.311841	27.947	0.311841	0.374034
0.312892	27.5519	0.312892	0.30789
0.313151	27.9731	0.313151	0.375949
0.313321	28.208	0.313321	0.413809
0.315373	28.3313	0.315373	0.429809
0.31584	27.909	0.31584	0.360838
0.3169	27.8804	0.3169	0.354433
0.318483	25.3571	0.318483	-0.051515
0.319013	28.22	0.319013	0.405034
0.319058	27.3634	0.319058	0.268301
0.319657	27.9779	0.319657	0.365301
0.320992	27.8234	0.320992	0.338512
0.321471	28.679	0.321471	0.473208
0.32284	28.3787	0.32284	0.423079
0.328173	28.1584	0.328173	0.379027
0.328512	27.6139	0.328512	0.294087
0.328591	27.5853	0.328591	0.289542
0.329809	27.2296	0.329809	0.232899
0.331983	27.752	0.331983	0.310261
0.333131	28.4356	0.333131	0.412997
0.333698	28.2888	0.333698	0.38959
0.333823	27.1794	0.333823	0.220226
0.335319	27.6997	0.335319	0.297392
0.335473	27.7092	0.335473	0.298615
0.336024	26.3561	0.336024	0.092868
0.337288	28.156	0.337288	0.363442
0.33775	27.9258	0.33775	0.32799
0.338369	27.664	0.338369	0.287679
0.338809	27.7235	0.338809	0.296007
0.34052	28.1086	0.34052	0.351156
0.340633	28.1679	0.340633	0.359838
0.343808	27.9115	0.343808	0.31685
0.344052	28.0469	0.344052	0.336526
0.345717	28.0564	0.345717	0.335415
0.346079	26.8945	0.346079	0.163982
0.348214	27.9448	0.348214	0.315375
0.349331	28.7288	0.349331	0.428008
0.351143	26.2333	0.351143	0.063115
0.351347	28.431	0.351347	0.381345
0.353624	28.2747	0.353624	0.355205
0.356887	28.5091	0.356887	0.383703
0.357103	28.6297	0.357103	0.400544
0.358468	28.1657	0.358468	0.332433
0.358955	25.6895	0.358955	-0.01938
0.360066	27.9852	0.360066	0.304635
0.360281	28.3008	0.360281	0.348923
0.364201	28.431	0.364201	0.361383
0.364468	27.4447	0.364468	0.223243
0.36514	27.8759	0.36514	0.282603
0.36643	28.9224	0.36643	0.42631
0.36701	26.5223	0.36701	0.092488
0.367401	28.4618	0.367401	0.360897
0.369594	27.9211	0.369594	0.283192
0.369923	28.45	0.369923	0.355551
0.371278	28.2535	0.371278	0.326633
0.37401	28.3625	0.37401	0.337732
0.379344	28.5802	0.379344	0.359601
0.381265	28.7975	0.381265	0.385868
0.38202	28.1349	0.38202	0.296465
0.382111	28.5731	0.382111	0.354719
0.383588	28.9131	0.383588	0.397754
0.383629	28.1325	0.383629	0.294133
0.3853	28.8589	0.3853	0.388004
0.386272	28.8753	0.386272	0.388736
0.387118	27.8023	0.387118	0.246394
0.388226	26.9425	0.388226	0.132445
0.388969	28.0542	0.388969	0.277316
0.391524	28.3176	0.391524	0.308533
0.39251	28.2986	0.39251	0.304833
0.394475	28.9579	0.394475	0.387469
0.39492	28.5661	0.39492	0.33632
0.395612	27.7071	0.395612	0.224893
0.397615	28.4478	0.397615	0.317653
0.402633	28.5211	0.402633	0.320665
0.405511	29.0121	0.405511	0.378709
0.406926	28.5496	0.406926	0.318891
0.408631	29.1981	0.408631	0.397575
0.409323	25.675	0.409323	-0.041508
0.412845	28.8566	0.412845	0.349529
0.414549	28.9368	0.414549	0.357179
0.42132	28.9675	0.42132	0.352178
0.421457	28.4195	0.421457	0.285825
0.42546	28.8472	0.42546	0.33257
0.430042	29.1064	0.430042	0.35774
0.430757	28.9581	0.430757	0.339311
0.431705	28.4006	0.431705	0.272429
0.432689	29.0665	0.432689	0.349722
0.433747	28.8072	0.433747	0.317991
0.433797	25.4155	0.433797	-0.080026
0.435943	29.1842	0.435943	0.359476
0.438813	29.2665	0.438813	0.365463
0.439087	28.147	0.439087	0.235351
0.440222	28.6324	0.440222	0.290398
0.440926	28.9887	0.440926	0.33077
0.443201	29.1842	0.443201	0.350571
0.444715	28.7742	0.444715	0.30182
0.445985	27.8072	0.445985	0.190077
0.449729	28.8992	0.449729	0.310552
0.449998	28.8214	0.449998	0.30145
0.450832	28.2395	0.450832	0.234861
0.455137	28.4125	0.455137	0.250236
0.45576	28.6183	0.45576	0.27263
0.456755	29.384	0.456755	0.356963
0.457897	28.448	0.457897	0.251566
0.458079	28.8049	0.458079	0.291045
0.459816	28.9936	0.459816	0.310132
0.460244	28.2822	0.460244	0.231007
0.460564	25.3086	0.460564	-0.097911
0.46137	28.6963	0.46137	0.275673
0.462958	29.7031	0.462958	0.384781
0.462983	29.4005	0.462983	0.351487
0.463511	29.3324	0.463511	0.343399
0.472751	29.4569	0.472751	0.346485
0.474896	27.6191	0.474896	0.147112
0.480735	29.3089	0.480735	0.322
0.483576	29.3207	0.483576	0.320263
0.484459	28.8758	0.484459	0.272595
0.484977	26.8155	0.484977	0.055884
0.486452	29.8577	0.486452	0.373462
0.490011	28.6893	0.490011	0.248048
0.501807	29.5274	0.501807	0.322893
0.50575	29.0997	0.50575	0.275887
0.512383	29.1797	0.512383	0.277879
0.512935	29.9584	0.512935	0.354644
0.513279	29.2009	0.513279	0.279172
0.513411	30.1989	0.513411	0.377991
0.514091	29.2386	0.514091	0.282166
0.523601	29.3209	0.523601	0.281689
0.524422	29.8414	0.524422	0.331486
0.525741	30.143	0.525741	0.359384
0.528158	29.5979	0.528158	0.304362
0.529709	29.9257	0.529709	0.334433
0.533192	29.6682	0.533192	0.306461
0.533493	29.3726	0.533493	0.277981
0.534463	29.9491	0.534463	0.332045
0.539828	29.9818	0.539828	0.329998
0.55296	30.1337	0.55296	0.331761
0.55335	29.8743	0.55335	0.307535
0.553354	29.544	0.553354	0.277148
0.557231	28.909	0.557231	0.215931
0.561715	30.0053	0.561715	0.312076
0.566928	28.876	0.566928	0.206118
0.568296	29.3233	0.568296	0.245244
0.573541	30.4905	0.573541	0.344892
0.577717	29.4925	0.577717	0.253136
0.578136	30.1175	0.578136	0.307848
0.578656	29.2787	0.578656	0.233624
0.581842	29.187	0.581842	0.22331
0.585595	30.0731	0.585595	0.297721
0.592432	30.1759	0.592432	0.300982
0.593012	30.5836	0.593012	0.335504
0.594646	30.744	0.594646	0.347805
0.6086	30.1876	0.6086	0.289063
0.61246	29.3399	0.61246	0.215629
0.619924	30.7998	0.619924	0.33068
0.625309	30.8068	0.625309	0.326813
0.627529	25.4956	0.627529	-0.10579
0.627786	30.5512	0.627786	0.304067
0.630524	30.5721	0.630524	0.303637
0.63176	30.3556	0.63176	0.285235
0.632672	30.0429	0.632672	0.259404
0.64058	29.6826	0.64058	0.225292
0.646118	29.2083	0.646118	0.184417
0.646499	30.1177	0.646499	0.255798
0.658965	30.9786	0.658965	0.313967
0.660656	30.6768	0.660656	0.28944
0.670018	30.323	0.670018	0.25594
0.671937	32.2016	0.671937	0.39698
0.674706	30.9276	0.674706	0.298491
0.675405	30.2927	0.675405	0.250144
0.679543	30.3417	0.679543	0.251163
0.683249	30.663	0.683249	0.272735
0.685458	25.3013	0.685458	-0.126871
0.689245	31.1919	0.689245	0.307815
0.690783	30.995	0.690783	0.29221
0.691479	29.6967	0.691479	0.196169
0.6958	31.1201	0.6958	0.297926
0.697409	31.534	0.697409	0.327023
0.702489	31.8015	0.702489	0.342703
0.707247	27.2349	0.707247	0.01051
0.725758	28.9611	0.725758	0.126597
0.727907	31.7786	0.727907	0.322689
0.734435	30.9464	0.734435	0.260505
0.735862	30.8001	0.735862	0.249528
0.736565	31.7394	0.736565	0.31402
0.741227	31.0391	0.741227	0.262799
0.754926	31.5896	0.754926	0.291793
0.772631	28.259	0.772631	0.061466
0.775304	30.4002	0.775304	0.201187
0.799065	30.8119	0.799065	0.215947
0.802501	32.1124	0.802501	0.296714
0.819382	31.4743	0.819382	0.247162
0.820573	31.5713	0.820573	0.25255
0.829007	31.5182	0.829007	0.244845
0.83767	31.6036	0.83767	0.245594
0.846497	32.9005	0.846497	0.319089
0.883193	30.8654	0.883193	0.180883
0.88995	32.4729	0.88995	0.270043
0.913594	31.2502	0.913594	0.19016
0.939074	32.5829	0.939074	0.252226
0.975058	31.3382	0.975058	0.171135
0.989766	33.3385	0.989766	0.268715
1.04636	32.6448	1.04636	0.210457
1.05131	33.1085	1.05131	0.23105
1.05676	33.5682	1.05676	0.251049
1.06459	33.0539	1.06459	0.223249
1.14728	27.6553	1.14728	-0.045647
1.2616	33.2547	1.2616	0.167673
1.2684	32.3518	1.2684	0.129557
1.30166	33.6163	1.30166	0.170974
1.32686	32.0395	1.32686	0.103738
1.34054	32.2418	1.34054	0.108475
1.34184	26.7438	1.34184	-0.100358
1.41826	34.6478	1.41826	0.178766
1.47456	35.0325	1.47456	0.178175
1.71613	35.6824	1.71613	0.146393
